# Supplementary material for: Kinetics of tautomerisation of thiouracils and cognate species at low temperatures: theory versus experiment
Source: Royal Society of Chemistry journal article supplement (doi:10.1039/d4cp04038d), 2024-01-01
Supplement: d4cp04038d1.pdf [file d4cp04038d1.pdf]

# Supplementary Information

## Kinetics of tautomerisation of thiouracils and cognate species at low temperatures: theory *versus* experiment

Judith Wurmel<sup>†</sup> and John M. Simmie

Table 1: High-level rate constants,  $k / \text{s}^{-1}$ , at various temperatures

| T/K | SU3      | SU2      | MeSU3    | NSU3     | NNSH     | 5SH      |
|-----|----------|----------|----------|----------|----------|----------|
| 3.5 | 2.10E-06 |          | 1.44E-04 | 6.97E-08 |          |          |
| 15  | 2.10E-06 | 6.90E-11 | 1.45E-04 | 7.01E-08 | 6.45E-11 | 1.85E-17 |
| 50  | 2.50E-06 | 9.55E-11 | 2.16E-04 | 8.64E-08 | 7.01E-11 | 2.18E-17 |
| 100 | 7.37E-06 | 1.18E-09 | 6.89E-04 | 2.74E-07 | 2.37E-10 | 2.65E-16 |
| 150 | 4.40E-05 | 4.13E-08 | 3.00E-03 | 2.05E-06 | 4.63E-09 | 2.63E-14 |
| 200 | 4.06E-04 | 1.37E-06 | 1.91E-02 | 2.85E-05 | 2.03E-07 | 3.21E-12 |
| 250 | 5.77E-03 | 4.39E-05 | 1.96E-01 | 5.68E-04 | 1.05E-05 | 4.58E-10 |
| 300 | 1.22E-01 | 1.58E-03 | 3.08E+00 | 1.48E-02 | 5.62E-04 | 5.80E-08 |

Table 2: Formation enthalpies kJ/mol

| Species | $\Delta H_f(0 \text{ K})$ |
|---------|---------------------------|
| SU1     | -42.92                    |
| SU2     | -10.37                    |
| SU3     | +23.80                    |
| MeSU1   | -43.75                    |
| MeSU3   | +25.00                    |
| NSU1    | +85.10                    |
| NSU3    | 139.40                    |
| NNSH    | 302.29                    |
| NNHS    | 285.00                    |
| 5SH     | 164.52                    |
| 5HS     | 140.56                    |

<sup>†</sup> Judith.wurmel@atu.ie

```

!+++++
!LIST OF PROCESSED FILES
!+++++
5HS-m062x.log
5SH-5HS-H2O-TS-d3bj.log
5SH-m062x.log
MeSU1-apf.log
MeSU1-apfd.log
MeSU1-b2plyp.log
MeSU1-b2plypd3.log
MeSU1-wb97xd.log
MeSU3-apf.log
MeSU3-apfd.log
MeSU3-b2plyp.log
MeSU3-b2plypd3.log
MeSU3-MeSU1-H2O-TS-d3bj.log
MeSU3-MeSU1-m062x-product.log
MeSU3-MeSU1-m062x-reactant.log
MeSU3-wb97xd.log
NNHS-m062x.log
NNSH-m062x.log
NNSH-NNHS-H2O-TS-d3bj.log
NSU3-dimer-reactant-qb3.log
NSU3-dimer-reactant-v2.log
NSU3-NSU1-H2O-TS-d3bj.log
NSU3-NSU1-m062x-product.log
NSU3-NSU1-m062x-reactant.log
NSU3-qb3.log
SU1-m062x.log
SU2-m062x.log
SU3-SU1-H2O-TS.log
TS-5SH-5HS-m062x.log
TS-MeSU3-MeSU1-apf.log
TS-MeSU3-MeSU1-apfd.log
TS-MeSU3-MeSU1-b2plyp.log
TS-MeSU3-MeSU1-wb97xd.log
TS-NNSH-NNHS-m062x.log
TS-NSU3-dimer-qb3.log
TS-NSU3-NSU1-m062x.log
TS-SU2-SU1-m062x.log
TS-SU2-SU1.log
TS-SU3-SU1-m062x.log

```

```

!+++++
GAUSSIAN OUTPUT FILENAME: 5HS-m062x.log
!+++++

```

```

1)LEVEL OF THEORY: OPT=VTIGHT
Charge = 0 Multiplicity = 1 Stoichiometry C3H4N2S

```

```

-----
----- OPTIMIZED GEOMETRY -----
-----

```

| Center<br>Number | Atomic<br>Number | Atomic<br>Type | Coordinates (Angstroms) |           |           |
|------------------|------------------|----------------|-------------------------|-----------|-----------|
|                  |                  |                | X                       | Y         | Z         |
| 1                | 7                | 0              | 1.068879                | -0.493993 | -0.000000 |
| 2                | 6                | 0              | 0.000000                | 0.350639  | 0.000000  |
| 3                | 6                | 0              | 0.672736                | -1.819199 | -0.000000 |
| 4                | 6                | 0              | -0.672708               | -1.819207 | 0.000000  |
| 5                | 7                | 0              | -1.068868               | -0.494010 | 0.000000  |
| 6                | 1                | 0              | -2.010404               | -0.141361 | 0.000000  |
| 7                | 1                | 0              | -1.372252               | -2.634443 | 0.000000  |
| 8                | 1                | 0              | 1.372296                | -2.634421 | -0.000000 |
| 9                | 16               | 0              | -0.000018               | 2.012137  | 0.000000  |
| 10               | 1                | 0              | 2.010412                | -0.141337 | -0.000000 |

```

-----
Rotational constants (GHZ):          9.2221519          2.1885885          1.7688156
-----

```

----- FREQUENCIES AND ROTATIONAL CONSTANTS -----

| INDEX NO. | DOF TYPE | CM-1 (UNSCALED) | CM-1 (SCALED BY ) | SYMMETRY | IR-INTENSITY |
|-----------|----------|-----------------|-------------------|----------|--------------|
| 1         | vib      | 216.35          | 0.00              | A''      | 2.1310       |
| 2         | vib      | 321.95          | 0.00              | A'       | 1.6936       |
| 3         | vib      | 543.53          | 0.00              | A'       | 18.6598      |
| 4         | vib      | 556.37          | 0.00              | A''      | 0.0000       |
| 5         | vib      | 600.83          | 0.00              | A''      | 95.4249      |
| 6         | vib      | 633.85          | 0.00              | A''      | 0.0000       |
| 7         | vib      | 692.87          | 0.00              | A''      | 44.7509      |
| 8         | vib      | 730.94          | 0.00              | A''      | 91.8471      |
| 9         | vib      | 859.21          | 0.00              | A''      | 0.0000       |
| 10        | vib      | 925.95          | 0.00              | A'       | 4.3633       |
| 11        | vib      | 974.91          | 0.00              | A'       | 0.1216       |
| 12        | vib      | 1074.80         | 0.00              | A'       | 49.3972      |
| 13        | vib      | 1136.50         | 0.00              | A'       | 10.3893      |
| 14        | vib      | 1152.84         | 0.00              | A'       | 0.0079       |
| 15        | vib      | 1220.78         | 0.00              | A'       | 126.1465     |
| 16        | vib      | 1267.54         | 0.00              | A'       | 0.2663       |
| 17        | vib      | 1396.00         | 0.00              | A'       | 19.4001      |
| 18        | vib      | 1439.72         | 0.00              | A'       | 2.1198       |
| 19        | vib      | 1538.62         | 0.00              | A'       | 455.9253     |
| 20        | vib      | 1646.63         | 0.00              | A'       | 48.3747      |
| 21        | vib      | 3310.58         | 0.00              | A'       | 5.7594       |
| 22        | vib      | 3330.78         | 0.00              | A'       | 1.0902       |
| 23        | vib      | 3682.90         | 0.00              | A'       | 214.5619     |
| 24        | vib      | 3683.72         | 0.00              | A'       | 0.0466       |
| 25        | rot      | 0.3076179       | -                 |          |              |
| 26        | rot      | 0.0730035       | -                 |          |              |
| 27        | rot      | 0.0590013       | -                 |          |              |

----- ZPE & THERMAL CONTRIBUTIONS -----

Eelectronic [kJ/mol] = -1639402.189  
 Ezpe [kJ/mol] = +197.015  
 Eelectronic+Ezpe [kJ/mol] = -1639205.174

Eelectronic [hartrees] = -624.415231  
 Ezpe [hartrees] = +0.075039  
 Eelectronic+Ezpe [hartrees] = -624.340192

Thermal Correction to Energy [kJ/mol] = +209.959  
 Thermal Correction to Enthalpy [kJ/mol] = +212.437  
 Thermal Correction to Gibbs [kJ/mol] = +121.605

!+++++  
 END OF GAUSSIAN OUTPUT FILENAME: 5HS-m062x.log  
 !+++++

!+++++  
 GAUSSIAN OUTPUT FILENAME: 5SH-5HS-H2O-TS-d3bj.log  
 !+++++

1) LEVEL OF THEORY: B3LYP/DEF2TZVP  
 Charge = 0 Multiplicity = 1 Stoichiometry C3H6N2OS

----- OPTIMIZED GEOMETRY -----

| Center Number | Atomic Number | Atomic Type | Coordinates (Angstroms) |           |           |
|---------------|---------------|-------------|-------------------------|-----------|-----------|
|               |               |             | X                       | Y         | Z         |
| 1             | 6             | 0           | -1.677340               | 1.171311  | -0.008924 |
| 2             | 7             | 0           | -0.321913               | 0.922397  | -0.010452 |
| 3             | 6             | 0           | -0.151044               | -0.404270 | 0.003855  |
| 4             | 16            | 0           | 1.369365                | -1.228927 | -0.003561 |
| 5             | 7             | 0           | -1.373977               | -0.992920 | 0.016379  |
| 6             | 6             | 0           | -2.349944               | -0.009148 | 0.008097  |

|    |   |   |           |           |           |
|----|---|---|-----------|-----------|-----------|
| 7  | 1 | 0 | 0.958348  | 1.528990  | -0.039322 |
| 8  | 8 | 0 | 2.073290  | 1.505700  | -0.084829 |
| 9  | 1 | 0 | 2.430180  | 1.817571  | 0.756825  |
| 10 | 1 | 0 | 2.048193  | 0.270409  | -0.056718 |
| 11 | 1 | 0 | -3.399570 | -0.239058 | 0.014540  |
| 12 | 1 | 0 | -1.521418 | -1.986940 | 0.022205  |
| 13 | 1 | 0 | -2.070702 | 2.172568  | -0.021582 |

-----  
Rotational constants (GHZ):                   3.5190272                   1.7596905                   1.1768135

-----  
----- FREQUENCIES AND ROTATIONAL CONSTANTS -----  
-----

| INDEX NO. | DOF TYPE | CM-1 (UNSCALED) | CM-1 (SCALED BY ) | SYMMETRY | IR-INTENSITY |
|-----------|----------|-----------------|-------------------|----------|--------------|
| 1         | vib      | -1230.73        | 0.00              | A        | 874.3200     |
| 2         | vib      | 98.67           | 0.00              | A        | 9.9311       |
| 3         | vib      | 227.99          | 0.00              | A        | 1.9373       |
| 4         | vib      | 311.85          | 0.00              | A        | 52.9106      |
| 5         | vib      | 408.75          | 0.00              | A        | 45.4442      |
| 6         | vib      | 457.91          | 0.00              | A        | 19.7805      |
| 7         | vib      | 474.89          | 0.00              | A        | 100.3448     |
| 8         | vib      | 531.24          | 0.00              | A        | 72.3690      |
| 9         | vib      | 547.47          | 0.00              | A        | 56.1143      |
| 10        | vib      | 577.48          | 0.00              | A        | 62.0233      |
| 11        | vib      | 634.71          | 0.00              | A        | 10.4369      |
| 12        | vib      | 693.92          | 0.00              | A        | 54.4364      |
| 13        | vib      | 729.36          | 0.00              | A        | 17.9222      |
| 14        | vib      | 843.46          | 0.00              | A        | 7.7634       |
| 15        | vib      | 956.99          | 0.00              | A        | 12.8641      |
| 16        | vib      | 983.85          | 0.00              | A        | 38.9824      |
| 17        | vib      | 1089.50         | 0.00              | A        | 56.3693      |
| 18        | vib      | 1140.17         | 0.00              | A        | 154.2108     |
| 19        | vib      | 1167.79         | 0.00              | A        | 34.6858      |
| 20        | vib      | 1182.56         | 0.00              | A        | 834.9261     |
| 21        | vib      | 1240.85         | 0.00              | A        | 216.8823     |
| 22        | vib      | 1261.00         | 0.00              | A        | 517.7970     |
| 23        | vib      | 1342.32         | 0.00              | A        | 340.5363     |
| 24        | vib      | 1413.50         | 0.00              | A        | 516.8781     |
| 25        | vib      | 1483.15         | 0.00              | A        | 130.8353     |
| 26        | vib      | 1512.30         | 0.00              | A        | 981.9063     |
| 27        | vib      | 1534.59         | 0.00              | A        | 112.7959     |
| 28        | vib      | 1570.15         | 0.00              | A        | 33.5601      |
| 29        | vib      | 1877.85         | 0.00              | A        | 661.6805     |
| 30        | vib      | 3262.53         | 0.00              | A        | 2.1049       |
| 31        | vib      | 3288.52         | 0.00              | A        | 0.3561       |
| 32        | vib      | 3656.58         | 0.00              | A        | 73.0310      |
| 33        | vib      | 3794.49         | 0.00              | A        | 60.6379      |
| 34        | rot      | 0.1173821       | -                 |          |              |
| 35        | rot      | 0.0586970       | -                 |          |              |
| 36        | rot      | 0.0392543       | -                 |          |              |

-----  
----- ZPE & THERMAL CONTRIBUTIONS -----  
-----

|                                |            |                |
|--------------------------------|------------|----------------|
| Eelectronic                    | [kJ/mol]   | = -1840509.878 |
| Ezpe                           | [kJ/mol]   | = +241.026     |
| Eelectronic+Ezpe               | [kJ/mol]   | = -1840268.852 |
| Eelectronic                    | [hartrees] | = -701.013094  |
| Ezpe                           | [hartrees] | = +0.091802    |
| Eelectronic+Ezpe               | [hartrees] | = -700.921292  |
| Thermal Correction to Energy   | [kJ/mol]   | = +258.134     |
| Thermal Correction to Enthalpy | [kJ/mol]   | = +260.612     |
| Thermal Correction to Gibbs    | [kJ/mol]   | = +159.693     |

!+++++  
END OF GAUSSIAN OUTPUT FILENAME: 5SH-5HS-H2O-TS-d3bj.log  
!+++++

!+++++  
 GAUSSIAN OUTPUT FILENAME: 5SH-m062x.log  
 !+++++

1)LEVEL OF THEORY: OPT  
 Charge = 0 Multiplicity = 1 Stoichiometry C3H4N2S

-----  
 ----- OPTIMIZED GEOMETRY -----  
 -----

| Center Number | Atomic Number | Atomic Type | Coordinates (Angstroms) |           |           |
|---------------|---------------|-------------|-------------------------|-----------|-----------|
|               |               |             | X                       | Y         | Z         |
| 1             | 7             | 0           | -0.483343               | -1.150861 | -0.003329 |
| 2             | 6             | 0           | 0.219815                | -0.052471 | -0.000601 |
| 3             | 6             | 0           | -1.796245               | -0.740473 | -0.001303 |
| 4             | 6             | 0           | -1.874923               | 0.617296  | 0.001505  |
| 5             | 7             | 0           | -0.567574               | 1.053318  | 0.002300  |
| 6             | 1             | 0           | -0.254402               | 2.008543  | 0.012373  |
| 7             | 1             | 0           | -2.705754               | 1.299376  | 0.002452  |
| 8             | 1             | 0           | -2.604287               | -1.452097 | -0.002495 |
| 9             | 16            | 0           | 1.968975                | 0.070969  | -0.004263 |
| 10            | 1             | 0           | 2.125385                | -1.254631 | 0.065476  |

-----  
 Rotational constants (GHZ):                    9.2117979                    2.1784750                    1.7618888  
 -----

-----  
 ----- FREQUENCIES AND ROTATIONAL CONSTANTS -----  
 -----

| INDEX NO. | DOF TYPE | CM-1 (UNSCALED) | CM-1 (SCALED BY ) | SYMMETRY | IR-INTENSITY |
|-----------|----------|-----------------|-------------------|----------|--------------|
| 1         | vib      | 184.80          | 0.00              | A        | 30.1884      |
| 2         | vib      | 232.41          | 0.00              | A        | 4.7557       |
| 3         | vib      | 286.33          | 0.00              | A        | 8.5954       |
| 4         | vib      | 495.01          | 0.00              | A        | 0.1881       |
| 5         | vib      | 535.45          | 0.00              | A        | 67.7014      |
| 6         | vib      | 645.13          | 0.00              | A        | 7.3621       |
| 7         | vib      | 714.13          | 0.00              | A        | 10.4158      |
| 8         | vib      | 753.24          | 0.00              | A        | 49.7285      |
| 9         | vib      | 894.97          | 0.00              | A        | 6.9250       |
| 10        | vib      | 909.66          | 0.00              | A        | 15.6949      |
| 11        | vib      | 929.85          | 0.00              | A        | 4.5201       |
| 12        | vib      | 983.75          | 0.00              | A        | 11.1288      |
| 13        | vib      | 1107.31         | 0.00              | A        | 33.6142      |
| 14        | vib      | 1137.04         | 0.00              | A        | 0.2235       |
| 15        | vib      | 1193.20         | 0.00              | A        | 3.3864       |
| 16        | vib      | 1254.35         | 0.00              | A        | 4.0494       |
| 17        | vib      | 1389.69         | 0.00              | A        | 25.7968      |
| 18        | vib      | 1476.80         | 0.00              | A        | 51.7065      |
| 19        | vib      | 1511.34         | 0.00              | A        | 51.2242      |
| 20        | vib      | 1590.67         | 0.00              | A        | 44.1020      |
| 21        | vib      | 2746.61         | 0.00              | A        | 9.4259       |
| 22        | vib      | 3283.88         | 0.00              | A        | 3.6458       |
| 23        | vib      | 3312.83         | 0.00              | A        | 0.2282       |
| 24        | vib      | 3684.03         | 0.00              | A        | 82.6106      |
| 25        | rot      | 0.3072725       | -                 |          |              |
| 26        | rot      | 0.0726661       | -                 |          |              |
| 27        | rot      | 0.0587703       | -                 |          |              |

-----  
 ----- ZPE & THERMAL CONTRIBUTIONS -----  
 -----

Eelectronic                    [kJ/mol]    = -1639363.683  
 Ezpe                            [kJ/mol]    = +186.930  
 Eelectronic+Ezpe               [kJ/mol]    = -1639176.753  
  
 Eelectronic                    [hartrees] = -624.400565  
 Ezpe                            [hartrees] = +0.071198  
 Eelectronic+Ezpe               [hartrees] = -624.329367  
  
 Thermal Correction to Energy   [kJ/mol]    = +201.168

Thermal Correction to Enthalpy [kJ/mol] = +203.647  
 Thermal Correction to Gibbs [kJ/mol] = +110.253

!+++++  
 END OF GAUSSIAN OUTPUT FILENAME: 5SH-m062x.log  
 !+++++

!+++++  
 GAUSSIAN OUTPUT FILENAME: MeSU1-apf.log  
 !+++++

1) LEVEL OF THEORY: OPT=VTIGHT  
 Charge = 0 Multiplicity = 1 Stoichiometry C5H6N2OS

-----  
 ----- OPTIMIZED GEOMETRY -----  
 -----

| Center Number | Atomic Number | Atomic Type | Coordinates (Angstroms) |           |           |
|---------------|---------------|-------------|-------------------------|-----------|-----------|
|               |               |             | X                       | Y         | Z         |
| 1             | 7             | 0           | -1.176538               | 0.041741  | 0.000000  |
| 2             | 7             | 0           | 1.123545                | -0.060672 | 0.000000  |
| 3             | 6             | 0           | -0.000000               | 0.730223  | 0.000000  |
| 4             | 6             | 0           | -1.382648               | -1.342262 | 0.000000  |
| 5             | 6             | 0           | -0.143654               | -2.087611 | 0.000000  |
| 6             | 6             | 0           | 1.025385                | -1.426189 | 0.000000  |
| 7             | 1             | 0           | -0.184127               | -3.166097 | 0.000000  |
| 8             | 1             | 0           | 1.973742                | -1.948377 | 0.000000  |
| 9             | 16            | 0           | 0.048828                | 2.380786  | 0.000000  |
| 10            | 1             | 0           | -2.009986               | 0.613546  | 0.000000  |
| 11            | 8             | 0           | -2.504914               | -1.796049 | 0.000000  |
| 12            | 6             | 0           | 2.430088                | 0.575722  | 0.000000  |
| 13            | 1             | 0           | 2.541982                | 1.206626  | 0.881854  |
| 14            | 1             | 0           | 3.190394                | -0.203302 | 0.000000  |
| 15            | 1             | 0           | 2.541982                | 1.206626  | -0.881854 |

-----  
 Rotational constants (GHZ):                    2.4084459                    1.1830627                    0.7972791

-----  
 ----- FREQUENCIES AND ROTATIONAL CONSTANTS -----  
 -----

| INDEX NO. | DOF TYPE | CM-1 (UNSCALED) | CM-1 (SCALED BY ) | SYMMETRY | IR-INTENSITY |
|-----------|----------|-----------------|-------------------|----------|--------------|
| 1         | vib      | 107.51          | 0.00              | A''      | 0.1574       |
| 2         | vib      | 123.97          | 0.00              | A''      | 0.7473       |
| 3         | vib      | 154.30          | 0.00              | A''      | 1.4347       |
| 4         | vib      | 256.88          | 0.00              | A''      | 3.1725       |
| 5         | vib      | 274.23          | 0.00              | A'       | 8.7074       |
| 6         | vib      | 352.77          | 0.00              | A'       | 1.0052       |
| 7         | vib      | 409.00          | 0.00              | A''      | 7.3130       |
| 8         | vib      | 457.89          | 0.00              | A'       | 22.0280      |
| 9         | vib      | 503.41          | 0.00              | A'       | 10.7189      |
| 10        | vib      | 551.62          | 0.00              | A'       | 0.3696       |
| 11        | vib      | 661.68          | 0.00              | A''      | 4.6372       |
| 12        | vib      | 717.10          | 0.00              | A''      | 27.1014      |
| 13        | vib      | 729.18          | 0.00              | A'       | 2.5451       |
| 14        | vib      | 758.90          | 0.00              | A''      | 10.0672      |
| 15        | vib      | 792.91          | 0.00              | A'       | 0.8886       |
| 16        | vib      | 830.28          | 0.00              | A''      | 66.3108      |
| 17        | vib      | 936.56          | 0.00              | A'       | 8.3622       |
| 18        | vib      | 978.53          | 0.00              | A''      | 0.4354       |
| 19        | vib      | 1049.47         | 0.00              | A'       | 6.3399       |
| 20        | vib      | 1146.44         | 0.00              | A''      | 0.0000       |
| 21        | vib      | 1151.82         | 0.00              | A'       | 103.8540     |
| 22        | vib      | 1187.45         | 0.00              | A'       | 40.4257      |
| 23        | vib      | 1236.02         | 0.00              | A'       | 34.2270      |
| 24        | vib      | 1252.57         | 0.00              | A'       | 56.9958      |
| 25        | vib      | 1333.01         | 0.00              | A'       | 63.8119      |
| 26        | vib      | 1406.75         | 0.00              | A'       | 59.0447      |
| 27        | vib      | 1450.85         | 0.00              | A'       | 24.0847      |
| 28        | vib      | 1458.00         | 0.00              | A''      | 14.7388      |

|    |     |           |      |     |          |
|----|-----|-----------|------|-----|----------|
| 29 | vib | 1471.07   | 0.00 | A'  | 69.6989  |
| 30 | vib | 1489.08   | 0.00 | A'  | 71.4153  |
| 31 | vib | 1533.43   | 0.00 | A'  | 483.8751 |
| 32 | vib | 1686.58   | 0.00 | A'  | 127.0296 |
| 33 | vib | 1802.89   | 0.00 | A'  | 700.2803 |
| 34 | vib | 3069.66   | 0.00 | A'  | 20.0208  |
| 35 | vib | 3143.88   | 0.00 | A'' | 4.0211   |
| 36 | vib | 3166.40   | 0.00 | A'  | 6.9434   |
| 37 | vib | 3216.78   | 0.00 | A'  | 3.6540   |
| 38 | vib | 3260.07   | 0.00 | A'  | 2.2477   |
| 39 | vib | 3604.25   | 0.00 | A'  | 63.1930  |
| 40 | rot | 0.0803371 | -    |     |          |
| 41 | rot | 0.0394627 | -    |     |          |
| 42 | rot | 0.0265944 | -    |     |          |

----- ZPE & THERMAL CONTRIBUTIONS -----

|                                |            |   |              |
|--------------------------------|------------|---|--------------|
| Eelectronic                    | [kJ/mol]   | = | -2039575.49  |
| Ezpe                           | [kJ/mol]   | = | +297.351     |
| Eelectronic+Ezpe               | [kJ/mol]   | = | -2039278.139 |
| Eelectronic                    | [hartrees] | = | -776.833171  |
| Ezpe                           | [hartrees] | = | +0.113255    |
| Eelectronic+Ezpe               | [hartrees] | = | -776.719916  |
| Thermal Correction to Energy   | [kJ/mol]   | = | +318.263     |
| Thermal Correction to Enthalpy | [kJ/mol]   | = | +320.742     |
| Thermal Correction to Gibbs    | [kJ/mol]   | = | +210.276     |

!+++++  
 END OF GAUSSIAN OUTPUT FILENAME: MeSU1-apf.log  
 !+++++

!+++++  
 GAUSSIAN OUTPUT FILENAME: MeSU1-apfd.log  
 !+++++

1)LEVEL OF THEORY: OPT=VTIGHT  
 Charge = 0 Multiplicity = 1 Stoichiometry C5H6N2OS

----- OPTIMIZED GEOMETRY -----

| Center Number | Atomic Number | Atomic Type | Coordinates (Angstroms) |           |           |
|---------------|---------------|-------------|-------------------------|-----------|-----------|
|               |               |             | X                       | Y         | Z         |
| 1             | 7             | 0           | -1.176955               | 0.042297  | 0.000000  |
| 2             | 7             | 0           | 1.123371                | -0.060660 | 0.000000  |
| 3             | 6             | 0           | 0.000000                | 0.733638  | 0.000000  |
| 4             | 6             | 0           | -1.381837               | -1.344494 | 0.000000  |
| 5             | 6             | 0           | -0.141892               | -2.088928 | 0.000000  |
| 6             | 6             | 0           | 1.026501                | -1.425931 | 0.000000  |
| 7             | 1             | 0           | -0.182875               | -3.167873 | 0.000000  |
| 8             | 1             | 0           | 1.976810                | -1.944697 | 0.000000  |
| 9             | 16            | 0           | 0.045376                | 2.387479  | 0.000000  |
| 10            | 1             | 0           | -2.012174               | 0.612322  | 0.000000  |
| 11            | 8             | 0           | -2.502152               | -1.804583 | 0.000000  |
| 12            | 6             | 0           | 2.431573                | 0.571175  | 0.000000  |
| 13            | 1             | 0           | 2.544549                | 1.201407  | 0.881969  |
| 14            | 1             | 0           | 3.189361                | -0.209771 | 0.000000  |
| 15            | 1             | 0           | 2.544549                | 1.201407  | -0.881969 |

Rotational constants (GHZ):                    2.4015427                    1.1805580                    0.7953860

----- FREQUENCIES AND ROTATIONAL CONSTANTS -----

INDEX NO. DOF TYPE CM-1(UNSCALED) CM-1(SCALED BY ) SYMMETRY IR-INTENSITY

|    |     |           |      |     |          |
|----|-----|-----------|------|-----|----------|
| 1  | vib | 105.96    | 0.00 | A'' | 0.1486   |
| 2  | vib | 124.20    | 0.00 | A'' | 0.9877   |
| 3  | vib | 158.72    | 0.00 | A'' | 1.3128   |
| 4  | vib | 256.48    | 0.00 | A'' | 3.0694   |
| 5  | vib | 281.77    | 0.00 | A'  | 9.4217   |
| 6  | vib | 353.74    | 0.00 | A'  | 0.8758   |
| 7  | vib | 408.47    | 0.00 | A'' | 7.3766   |
| 8  | vib | 457.20    | 0.00 | A'  | 22.0679  |
| 9  | vib | 502.59    | 0.00 | A'  | 10.3551  |
| 10 | vib | 544.39    | 0.00 | A'  | 0.5805   |
| 11 | vib | 662.33    | 0.00 | A'' | 4.7429   |
| 12 | vib | 715.85    | 0.00 | A'' | 27.3248  |
| 13 | vib | 724.04    | 0.00 | A'  | 2.9175   |
| 14 | vib | 758.52    | 0.00 | A'' | 9.9789   |
| 15 | vib | 790.00    | 0.00 | A'  | 0.8178   |
| 16 | vib | 831.09    | 0.00 | A'' | 66.0136  |
| 17 | vib | 931.00    | 0.00 | A'  | 8.1543   |
| 18 | vib | 978.36    | 0.00 | A'' | 0.4093   |
| 19 | vib | 1051.92   | 0.00 | A'  | 5.5000   |
| 20 | vib | 1147.08   | 0.00 | A'' | 0.0003   |
| 21 | vib | 1152.65   | 0.00 | A'  | 120.2985 |
| 22 | vib | 1187.71   | 0.00 | A'  | 25.6220  |
| 23 | vib | 1237.58   | 0.00 | A'  | 48.5263  |
| 24 | vib | 1251.66   | 0.00 | A'  | 57.2897  |
| 25 | vib | 1338.80   | 0.00 | A'  | 77.7794  |
| 26 | vib | 1404.81   | 0.00 | A'  | 57.3016  |
| 27 | vib | 1447.56   | 0.00 | A'  | 21.8222  |
| 28 | vib | 1460.16   | 0.00 | A'' | 14.6990  |
| 29 | vib | 1470.86   | 0.00 | A'  | 64.2562  |
| 30 | vib | 1488.45   | 0.00 | A'  | 74.7086  |
| 31 | vib | 1533.17   | 0.00 | A'  | 459.2049 |
| 32 | vib | 1682.41   | 0.00 | A'  | 116.4187 |
| 33 | vib | 1798.51   | 0.00 | A'  | 714.1304 |
| 34 | vib | 3071.46   | 0.00 | A'  | 19.8473  |
| 35 | vib | 3145.57   | 0.00 | A'' | 4.0701   |
| 36 | vib | 3169.37   | 0.00 | A'  | 6.6593   |
| 37 | vib | 3216.09   | 0.00 | A'  | 3.8454   |
| 38 | vib | 3257.06   | 0.00 | A'  | 2.1928   |
| 39 | vib | 3602.43   | 0.00 | A'  | 63.0196  |
| 40 | rot | 0.0801068 | -    |     |          |
| 41 | rot | 0.0393792 | -    |     |          |
| 42 | rot | 0.0265312 | -    |     |          |

----- ZPE & THERMAL CONTRIBUTIONS -----

Eelectronic [kJ/mol] = -2039598.371  
 Ezpe [kJ/mol] = +297.272  
 Eelectronic+Ezpe [kJ/mol] = -2039301.099

Eelectronic [hartrees] = -776.841886  
 Ezpe [hartrees] = +0.113225  
 Eelectronic+Ezpe [hartrees] = -776.728661

Thermal Correction to Energy [kJ/mol] = +318.169  
 Thermal Correction to Enthalpy [kJ/mol] = +320.647  
 Thermal Correction to Gibbs [kJ/mol] = +210.229

!+++++  
 END OF GAUSSIAN OUTPUT FILENAME: MeSU1-apfd.log

!+++++  
 GAUSSIAN OUTPUT FILENAME: MeSU1-b2plyp.log

1) LEVEL OF THEORY: OPT=VTIGHT  
 Charge = 0 Multiplicity = 1 Stoichiometry C5H6N2OS



-----  
 ----- OPTIMIZED GEOMETRY -----  
 -----

| Center<br>Number | Atomic<br>Number | Atomic<br>Type | Coordinates (Angstroms) |           |           |
|------------------|------------------|----------------|-------------------------|-----------|-----------|
|                  |                  |                | X                       | Y         | Z         |
| 1                | 7                | 0              | -1.180519               | 0.040259  | 0.000000  |
| 2                | 7                | 0              | 1.127095                | -0.059003 | 0.000000  |
| 3                | 6                | 0              | -0.000000               | 0.735321  | 0.000000  |
| 4                | 6                | 0              | -1.384189               | -1.349277 | 0.000000  |
| 5                | 6                | 0              | -0.142483               | -2.093351 | 0.000000  |
| 6                | 6                | 0              | 1.029802                | -1.430271 | 0.000000  |
| 7                | 1                | 0              | -0.180672               | -3.170284 | 0.000000  |
| 8                | 1                | 0              | 1.976246                | -1.951215 | 0.000000  |
| 9                | 16               | 0              | 0.043825                | 2.390886  | 0.000000  |
| 10               | 1                | 0              | -2.016720               | 0.609525  | 0.000000  |
| 11               | 8                | 0              | -2.510617               | -1.808210 | 0.000000  |
| 12               | 6                | 0              | 2.442431                | 0.578568  | 0.000000  |
| 13               | 1                | 0              | 2.554246                | 1.205935  | 0.881408  |
| 14               | 1                | 0              | 3.196992                | -0.203131 | 0.000000  |
| 15               | 1                | 0              | 2.554246                | 1.205935  | -0.881408 |

Rotational constants (GHZ):                    2.3891898                    1.1744831                    0.7912686

-----  
 ----- FREQUENCIES AND ROTATIONAL CONSTANTS -----  
 -----

| INDEX NO. | DOF | TYPE | CM-1(UNSCALED) | CM-1(SCALED BY ) | SYMMETRY | IR-INTENSITY |
|-----------|-----|------|----------------|------------------|----------|--------------|
| 1         | vib |      | 106.42         | 0.00             | A"       | 0.1498       |
| 2         | vib |      | 122.14         | 0.00             | A"       | 0.7126       |
| 3         | vib |      | 155.73         | 0.00             | A"       | 1.1903       |
| 4         | vib |      | 251.60         | 0.00             | A"       | 3.2355       |
| 5         | vib |      | 274.24         | 0.00             | A'       | 8.2755       |
| 6         | vib |      | 351.45         | 0.00             | A'       | 0.9016       |
| 7         | vib |      | 407.46         | 0.00             | A"       | 6.8782       |
| 8         | vib |      | 455.93         | 0.00             | A'       | 22.5195      |
| 9         | vib |      | 499.44         | 0.00             | A'       | 10.2603      |
| 10        | vib |      | 548.25         | 0.00             | A'       | 0.4031       |
| 11        | vib |      | 653.84         | 0.00             | A"       | 4.5739       |
| 12        | vib |      | 711.89         | 0.00             | A"       | 26.6202      |
| 13        | vib |      | 722.93         | 0.00             | A'       | 2.0035       |
| 14        | vib |      | 750.48         | 0.00             | A"       | 14.6599      |
| 15        | vib |      | 783.03         | 0.00             | A'       | 1.0516       |
| 16        | vib |      | 824.11         | 0.00             | A"       | 62.1984      |
| 17        | vib |      | 927.81         | 0.00             | A'       | 10.3295      |
| 18        | vib |      | 970.86         | 0.00             | A"       | 0.5375       |
| 19        | vib |      | 1049.57        | 0.00             | A'       | 5.1123       |
| 20        | vib |      | 1153.12        | 0.00             | A'       | 134.6702     |
| 21        | vib |      | 1158.39        | 0.00             | A"       | 0.0708       |
| 22        | vib |      | 1183.96        | 0.00             | A'       | 21.2071      |
| 23        | vib |      | 1217.39        | 0.00             | A'       | 50.4007      |
| 24        | vib |      | 1246.81        | 0.00             | A'       | 60.0675      |
| 25        | vib |      | 1334.77        | 0.00             | A'       | 73.5010      |
| 26        | vib |      | 1396.67        | 0.00             | A'       | 91.1892      |
| 27        | vib |      | 1448.58        | 0.00             | A'       | 10.9744      |
| 28        | vib |      | 1479.54        | 0.00             | A'       | 147.1673     |
| 29        | vib |      | 1482.24        | 0.00             | A"       | 13.0840      |
| 30        | vib |      | 1497.86        | 0.00             | A'       | 159.9825     |
| 31        | vib |      | 1536.71        | 0.00             | A'       | 286.9233     |
| 32        | vib |      | 1665.79        | 0.00             | A'       | 82.2810      |
| 33        | vib |      | 1765.27        | 0.00             | A'       | 667.1936     |
| 34        | vib |      | 3079.75        | 0.00             | A'       | 20.2413      |
| 35        | vib |      | 3155.38        | 0.00             | A"       | 4.4244       |
| 36        | vib |      | 3174.59        | 0.00             | A'       | 6.7122       |
| 37        | vib |      | 3225.84        | 0.00             | A'       | 4.0973       |
| 38        | vib |      | 3262.79        | 0.00             | A'       | 1.7084       |
| 39        | vib |      | 3577.82        | 0.00             | A'       | 64.0984      |
| 40        | rot |      | 0.0796948      | -                |          |              |
| 41        | rot |      | 0.0391765      | -                |          |              |
| 42        | rot |      | 0.0263939      | -                |          |              |

```

----- ZPE & THERMAL CONTRIBUTIONS -----
Eelectronic      [kJ/mol] = -2039520.261
Ezpe             [kJ/mol] = +296.737
Eelectronic+Ezpe [kJ/mol] = -2039223.524

Eelectronic      [hartrees] = -776.812135
Ezpe             [hartrees] = +0.113021
Eelectronic+Ezpe [hartrees] = -776.699114

Thermal Correction to Energy [kJ/mol] = +317.749
Thermal Correction to Enthalpy [kJ/mol] = +320.227
Thermal Correction to Gibbs [kJ/mol] = +209.541

```

```

!+++++
END OF GAUSSIAN OUTPUT FILENAME: MeSU1-b2plyp.log
!+++++

```

```

!+++++
GAUSSIAN OUTPUT FILENAME: MeSU1-b2plypd3.log
!+++++

```

```

1)LEVEL OF THEORY: OPT=VTIGHT
Charge = 0 Multiplicity = 1 Stoichiometry C5H6N2OS

```

```

----- OPTIMIZED GEOMETRY -----

```

| Center Number | Atomic Number | Atomic Type | Coordinates (Angstroms) |           |           |
|---------------|---------------|-------------|-------------------------|-----------|-----------|
|               |               |             | X                       | Y         | Z         |
| 1             | 7             | 0           | -1.180494               | 0.040804  | 0.000000  |
| 2             | 7             | 0           | 1.126290                | -0.059510 | 0.000000  |
| 3             | 6             | 0           | 0.000000                | 0.734685  | 0.000000  |
| 4             | 6             | 0           | -1.384143               | -1.348115 | 0.000000  |
| 5             | 6             | 0           | -0.142977               | -2.092529 | 0.000000  |
| 6             | 6             | 0           | 1.029377                | -1.430186 | 0.000000  |
| 7             | 1             | 0           | -0.181901               | -3.169271 | 0.000000  |
| 8             | 1             | 0           | 1.975787                | -1.950813 | 0.000000  |
| 9             | 16            | 0           | 0.045842                | 2.389370  | 0.000000  |
| 10            | 1             | 0           | -2.016238               | 0.610456  | 0.000000  |
| 11            | 8             | 0           | -2.510567               | -1.806901 | 0.000000  |
| 12            | 6             | 0           | 2.440386                | 0.578758  | 0.000000  |
| 13            | 1             | 0           | 2.550848                | 1.206282  | 0.881311  |
| 14            | 1             | 0           | 3.195290                | -0.202394 | 0.000000  |
| 15            | 1             | 0           | 2.550848                | 1.206282  | -0.881311 |

```

Rotational constants (GHZ):          2.3929277          1.1752338          0.7920184

```

```

----- FREQUENCIES AND ROTATIONAL CONSTANTS -----

```

| INDEX NO. | DOF TYPE | CM-1 (UNSCALED) | CM-1 (SCALED BY ) | SYMMETRY | IR-INTENSITY |
|-----------|----------|-----------------|-------------------|----------|--------------|
| 1         | vib      | 106.30          | 0.00              | A''      | 0.1561       |
| 2         | vib      | 122.18          | 0.00              | A''      | 0.7724       |
| 3         | vib      | 157.58          | 0.00              | A''      | 1.1385       |
| 4         | vib      | 250.92          | 0.00              | A''      | 3.2200       |
| 5         | vib      | 275.28          | 0.00              | A'       | 8.3179       |
| 6         | vib      | 352.52          | 0.00              | A'       | 0.8781       |
| 7         | vib      | 406.90          | 0.00              | A''      | 6.8703       |
| 8         | vib      | 456.60          | 0.00              | A'       | 22.4240      |
| 9         | vib      | 499.99          | 0.00              | A'       | 10.2489      |
| 10        | vib      | 548.94          | 0.00              | A'       | 0.3984       |
| 11        | vib      | 653.52          | 0.00              | A''      | 4.5848       |
| 12        | vib      | 711.65          | 0.00              | A''      | 26.8162      |
| 13        | vib      | 724.39          | 0.00              | A'       | 2.0272       |
| 14        | vib      | 750.20          | 0.00              | A''      | 14.4545      |
| 15        | vib      | 784.59          | 0.00              | A'       | 1.0173       |
| 16        | vib      | 823.88          | 0.00              | A''      | 62.2171      |

|    |     |           |      |     |          |
|----|-----|-----------|------|-----|----------|
| 17 | vib | 929.40    | 0.00 | A'  | 10.2114  |
| 18 | vib | 970.63    | 0.00 | A'' | 0.5328   |
| 19 | vib | 1050.87   | 0.00 | A'  | 5.1402   |
| 20 | vib | 1154.71   | 0.00 | A'  | 132.4965 |
| 21 | vib | 1158.99   | 0.00 | A'' | 0.0706   |
| 22 | vib | 1185.32   | 0.00 | A'  | 22.0004  |
| 23 | vib | 1219.87   | 0.00 | A'  | 49.4045  |
| 24 | vib | 1248.43   | 0.00 | A'  | 60.4732  |
| 25 | vib | 1336.01   | 0.00 | A'  | 72.5734  |
| 26 | vib | 1398.62   | 0.00 | A'  | 88.5781  |
| 27 | vib | 1449.58   | 0.00 | A'  | 11.4932  |
| 28 | vib | 1480.38   | 0.00 | A'  | 140.0925 |
| 29 | vib | 1482.33   | 0.00 | A'' | 13.1252  |
| 30 | vib | 1498.64   | 0.00 | A'  | 159.2899 |
| 31 | vib | 1537.63   | 0.00 | A'  | 298.2898 |
| 32 | vib | 1667.33   | 0.00 | A'  | 82.5189  |
| 33 | vib | 1766.14   | 0.00 | A'  | 668.0595 |
| 34 | vib | 3080.57   | 0.00 | A'  | 20.2988  |
| 35 | vib | 3156.26   | 0.00 | A'' | 4.4170   |
| 36 | vib | 3175.74   | 0.00 | A'  | 6.7489   |
| 37 | vib | 3226.72   | 0.00 | A'  | 4.0942   |
| 38 | vib | 3263.80   | 0.00 | A'  | 1.7116   |
| 39 | vib | 3579.64   | 0.00 | A'  | 64.1631  |
| 40 | rot | 0.0798195 | -    |     |          |
| 41 | rot | 0.0392016 | -    |     |          |
| 42 | rot | 0.0264189 | -    |     |          |

----- ZPE & THERMAL CONTRIBUTIONS -----

Eelectronic [kJ/mol] = -2039556.222  
 Ezpe [kJ/mol] = +296.931  
 Eelectronic+Ezpe [kJ/mol] = -2039259.291

Eelectronic [hartrees] = -776.825832  
 Ezpe [hartrees] = +0.113095  
 Eelectronic+Ezpe [hartrees] = -776.712737

Thermal Correction to Energy [kJ/mol] = +317.924  
 Thermal Correction to Enthalpy [kJ/mol] = +320.403  
 Thermal Correction to Gibbs [kJ/mol] = +209.764

!+++++  
 END OF GAUSSIAN OUTPUT FILENAME: MeSU1-b2plypd3.log  
 !+++++

!+++++  
 GAUSSIAN OUTPUT FILENAME: MeSU1-wb97xd.log  
 !+++++

1)LEVEL OF THEORY: OPT=VTIGHT  
 Charge = 0 Multiplicity = 1 Stoichiometry C5H6N2OS

----- OPTIMIZED GEOMETRY -----

| Center Number | Atomic Number | Atomic Type | Coordinates (Angstroms) |           |          |
|---------------|---------------|-------------|-------------------------|-----------|----------|
|               |               |             | X                       | Y         | Z        |
| 1             | 7             | 0           | -1.177271               | 0.041485  | 0.000000 |
| 2             | 7             | 0           | 1.123491                | -0.057849 | 0.000000 |
| 3             | 6             | 0           | 0.000000                | 0.729846  | 0.000000 |
| 4             | 6             | 0           | -1.379877               | -1.342668 | 0.000000 |
| 5             | 6             | 0           | -0.137315               | -2.088505 | 0.000000 |
| 6             | 6             | 0           | 1.026565                | -1.427192 | 0.000000 |
| 7             | 1             | 0           | -0.177090               | -3.165754 | 0.000000 |
| 8             | 1             | 0           | 1.973713                | -1.948554 | 0.000000 |
| 9             | 16            | 0           | 0.038796                | 2.382131  | 0.000000 |
| 10            | 1             | 0           | -2.010695               | 0.610810  | 0.000000 |

|    |   |   |           |           |           |
|----|---|---|-----------|-----------|-----------|
| 11 | 8 | 0 | -2.497809 | -1.799064 | 0.000000  |
| 12 | 6 | 0 | 2.434446  | 0.576736  | 0.000000  |
| 13 | 1 | 0 | 2.548226  | 1.204785  | 0.882167  |
| 14 | 1 | 0 | 3.192904  | -0.202422 | 0.000000  |
| 15 | 1 | 0 | 2.548226  | 1.204785  | -0.882167 |

Rotational constants (GHZ):                    2.3991524                    1.1849434                    0.7971123

----- FREQUENCIES AND ROTATIONAL CONSTANTS -----

| INDEX NO. | DOF TYPE | CM-1(UNSCALED) | CM-1(SCALED BY ) | SYMMETRY | IR-INTENSITY |
|-----------|----------|----------------|------------------|----------|--------------|
| 1         | vib      | 106.16         | 0.00             | A''      | 0.1880       |
| 2         | vib      | 123.16         | 0.00             | A''      | 0.6318       |
| 3         | vib      | 154.84         | 0.00             | A''      | 1.7059       |
| 4         | vib      | 256.76         | 0.00             | A''      | 3.3790       |
| 5         | vib      | 279.58         | 0.00             | A'       | 8.8383       |
| 6         | vib      | 357.87         | 0.00             | A'       | 1.1064       |
| 7         | vib      | 412.30         | 0.00             | A''      | 7.4928       |
| 8         | vib      | 461.79         | 0.00             | A'       | 25.2527      |
| 9         | vib      | 508.90         | 0.00             | A'       | 11.3292      |
| 10        | vib      | 557.40         | 0.00             | A'       | 0.5018       |
| 11        | vib      | 669.87         | 0.00             | A''      | 5.2029       |
| 12        | vib      | 720.81         | 0.00             | A''      | 28.8817      |
| 13        | vib      | 732.36         | 0.00             | A'       | 3.4428       |
| 14        | vib      | 766.25         | 0.00             | A''      | 10.0861      |
| 15        | vib      | 796.84         | 0.00             | A'       | 0.9969       |
| 16        | vib      | 839.46         | 0.00             | A''      | 69.5557      |
| 17        | vib      | 939.83         | 0.00             | A'       | 9.8837       |
| 18        | vib      | 997.47         | 0.00             | A''      | 0.2751       |
| 19        | vib      | 1058.29        | 0.00             | A'       | 7.7222       |
| 20        | vib      | 1157.96        | 0.00             | A''      | 0.0257       |
| 21        | vib      | 1161.51        | 0.00             | A'       | 136.3273     |
| 22        | vib      | 1197.79        | 0.00             | A'       | 43.2701      |
| 23        | vib      | 1241.44        | 0.00             | A'       | 37.9530      |
| 24        | vib      | 1262.43        | 0.00             | A'       | 47.6793      |
| 25        | vib      | 1343.70        | 0.00             | A'       | 89.9407      |
| 26        | vib      | 1421.76        | 0.00             | A'       | 73.5448      |
| 27        | vib      | 1463.97        | 0.00             | A'       | 30.5337      |
| 28        | vib      | 1474.17        | 0.00             | A''      | 14.6123      |
| 29        | vib      | 1486.30        | 0.00             | A'       | 74.7391      |
| 30        | vib      | 1502.26        | 0.00             | A'       | 64.7487      |
| 31        | vib      | 1545.43        | 0.00             | A'       | 549.2092     |
| 32        | vib      | 1706.78        | 0.00             | A'       | 132.3863     |
| 33        | vib      | 1823.54        | 0.00             | A'       | 749.9340     |
| 34        | vib      | 3075.86        | 0.00             | A'       | 19.7974      |
| 35        | vib      | 3152.68        | 0.00             | A''      | 4.5047       |
| 36        | vib      | 3173.32        | 0.00             | A'       | 7.0485       |
| 37        | vib      | 3227.46        | 0.00             | A'       | 3.6885       |
| 38        | vib      | 3267.28        | 0.00             | A'       | 1.8570       |
| 39        | vib      | 3628.04        | 0.00             | A'       | 63.1837      |
| 40        | rot      | 0.0800271      | -                |          |              |
| 41        | rot      | 0.0395255      | -                |          |              |
| 42        | rot      | 0.0265888      | -                |          |              |

----- ZPE & THERMAL CONTRIBUTIONS -----

|                                |            |                |
|--------------------------------|------------|----------------|
| Eelectronic                    | [kJ/mol]   | = -2040306.39  |
| Ezpe                           | [kJ/mol]   | = +299.388     |
| Eelectronic+Ezpe               | [kJ/mol]   | = -2040007.002 |
| Eelectronic                    | [hartrees] | = -777.111556  |
| Ezpe                           | [hartrees] | = +0.114031    |
| Eelectronic+Ezpe               | [hartrees] | = -776.997525  |
| Thermal Correction to Energy   | [kJ/mol]   | = +320.180     |
| Thermal Correction to Enthalpy | [kJ/mol]   | = +322.658     |
| Thermal Correction to Gibbs    | [kJ/mol]   | = +212.356     |

!+++++  
 END OF GAUSSIAN OUTPUT FILENAME: MeSU1-wb97xd.log  
 !+++++

!+++++  
 GAUSSIAN OUTPUT FILENAME: MeSU3-apf.log  
 !+++++

1)LEVEL OF THEORY: OPT=VTIGHT  
 Charge = 0 Multiplicity = 1 Stoichiometry C5H6N2OS

-----  
 ----- OPTIMIZED GEOMETRY -----  
 -----

| Center<br>Number | Atomic<br>Number | Atomic<br>Type | Coordinates (Angstroms) |           |           |
|------------------|------------------|----------------|-------------------------|-----------|-----------|
|                  |                  |                | X                       | Y         | Z         |
| 1                | 7                | 0              | -1.223339               | 0.217216  | 0.000000  |
| 2                | 7                | 0              | 1.089190                | -0.231026 | 0.000000  |
| 3                | 6                | 0              | -0.000000               | 0.598503  | 0.000000  |
| 4                | 6                | 0              | -1.549995               | -1.146396 | 0.000000  |
| 5                | 6                | 0              | -0.413293               | -2.061732 | 0.000000  |
| 6                | 6                | 0              | 0.838266                | -1.581833 | 0.000000  |
| 7                | 1                | 0              | -0.600050               | -3.126568 | 0.000000  |
| 8                | 1                | 0              | 1.716786                | -2.215141 | 0.000000  |
| 9                | 16               | 0              | 0.376770                | 2.326940  | 0.000000  |
| 10               | 1                | 0              | -0.925594               | 2.649559  | 0.000000  |
| 11               | 8                | 0              | -2.704245               | -1.517145 | 0.000000  |
| 12               | 6                | 0              | 2.448377                | 0.275589  | 0.000000  |
| 13               | 1                | 0              | 2.639520                | 0.879657  | 0.889568  |
| 14               | 1                | 0              | 3.134375                | -0.569155 | 0.000000  |
| 15               | 1                | 0              | 2.639520                | 0.879657  | -0.889568 |

-----  
 Rotational constants (GHZ):                    2.4218298                    1.1764851                    0.7958057  
 -----

-----  
 ----- FREQUENCIES AND ROTATIONAL CONSTANTS -----  
 -----

| INDEX NO. | DOF TYPE | CM-1 (UNSCALED) | CM-1 (SCALED BY ) | SYMMETRY | IR-INTENSITY |
|-----------|----------|-----------------|-------------------|----------|--------------|
| 1         | vib      | 76.54           | 0.00              | A"       | 0.6993       |
| 2         | vib      | 90.82           | 0.00              | A"       | 0.2227       |
| 3         | vib      | 169.32          | 0.00              | A"       | 0.3525       |
| 4         | vib      | 221.83          | 0.00              | A"       | 4.2892       |
| 5         | vib      | 247.45          | 0.00              | A'       | 4.1592       |
| 6         | vib      | 338.50          | 0.00              | A"       | 19.7798      |
| 7         | vib      | 339.63          | 0.00              | A'       | 1.2931       |
| 8         | vib      | 425.43          | 0.00              | A"       | 0.1949       |
| 9         | vib      | 438.04          | 0.00              | A'       | 12.9961      |
| 10        | vib      | 482.06          | 0.00              | A'       | 2.1244       |
| 11        | vib      | 551.78          | 0.00              | A'       | 0.0235       |
| 12        | vib      | 656.75          | 0.00              | A"       | 2.8581       |
| 13        | vib      | 711.43          | 0.00              | A'       | 5.9221       |
| 14        | vib      | 757.74          | 0.00              | A"       | 0.5274       |
| 15        | vib      | 775.67          | 0.00              | A'       | 0.9859       |
| 16        | vib      | 848.37          | 0.00              | A"       | 48.4433      |
| 17        | vib      | 881.68          | 0.00              | A'       | 10.0548      |
| 18        | vib      | 952.75          | 0.00              | A'       | 33.7461      |
| 19        | vib      | 972.94          | 0.00              | A"       | 0.0042       |
| 20        | vib      | 1037.05         | 0.00              | A'       | 1.1564       |
| 21        | vib      | 1128.59         | 0.00              | A'       | 83.6891      |
| 22        | vib      | 1141.19         | 0.00              | A"       | 0.0001       |
| 23        | vib      | 1177.85         | 0.00              | A'       | 11.0630      |
| 24        | vib      | 1220.66         | 0.00              | A'       | 50.9001      |
| 25        | vib      | 1298.87         | 0.00              | A'       | 36.4503      |
| 26        | vib      | 1391.16         | 0.00              | A'       | 98.2518      |
| 27        | vib      | 1456.78         | 0.00              | A'       | 149.7645     |
| 28        | vib      | 1467.68         | 0.00              | A'       | 1.9191       |
| 29        | vib      | 1476.97         | 0.00              | A"       | 13.8166      |
| 30        | vib      | 1512.94         | 0.00              | A'       | 94.3634      |
| 31        | vib      | 1574.46         | 0.00              | A'       | 271.9155     |
| 32        | vib      | 1705.13         | 0.00              | A'       | 246.3344     |

|    |     |           |      |     |          |
|----|-----|-----------|------|-----|----------|
| 33 | vib | 1774.01   | 0.00 | A'  | 530.2058 |
| 34 | vib | 2720.97   | 0.00 | A'  | 11.8818  |
| 35 | vib | 3053.18   | 0.00 | A'  | 20.5842  |
| 36 | vib | 3120.25   | 0.00 | A'' | 6.1577   |
| 37 | vib | 3162.39   | 0.00 | A'  | 4.9940   |
| 38 | vib | 3208.78   | 0.00 | A'  | 3.1876   |
| 39 | vib | 3238.64   | 0.00 | A'  | 0.8918   |
| 40 | rot | 0.0807835 | -    |     |          |
| 41 | rot | 0.0392433 | -    |     |          |
| 42 | rot | 0.0265452 | -    |     |          |

----- ZPE & THERMAL CONTRIBUTIONS -----

Eelectronic [kJ/mol] = -2039491.724  
 Ezpe [kJ/mol] = +285.946  
 Eelectronic+Ezpe [kJ/mol] = -2039205.778

Eelectronic [hartrees] = -776.801266  
 Ezpe [hartrees] = +0.108911  
 Eelectronic+Ezpe [hartrees] = -776.692355

Thermal Correction to Energy [kJ/mol] = +308.284  
 Thermal Correction to Enthalpy [kJ/mol] = +310.762  
 Thermal Correction to Gibbs [kJ/mol] = +196.873

!+++++  
 END OF GAUSSIAN OUTPUT FILENAME: MeSU3-apf.log  
 !+++++

!+++++  
 GAUSSIAN OUTPUT FILENAME: MeSU3-apfd.log  
 !+++++

1)LEVEL OF THEORY: OPT=VTIGHT  
 Charge = 0 Multiplicity = 1 Stoichiometry C5H6N2OS

----- OPTIMIZED GEOMETRY -----

| Center Number | Atomic Number | Atomic Type | Coordinates (Angstroms) |           |           |
|---------------|---------------|-------------|-------------------------|-----------|-----------|
|               |               |             | X                       | Y         | Z         |
| 1             | 7             | 0           | -1.222399               | 0.214236  | 0.000000  |
| 2             | 7             | 0           | 1.091165                | -0.229635 | 0.000000  |
| 3             | 6             | 0           | 0.000000                | 0.599710  | 0.000000  |
| 4             | 6             | 0           | -1.546681               | -1.151439 | 0.000000  |
| 5             | 6             | 0           | -0.407399               | -2.063299 | 0.000000  |
| 6             | 6             | 0           | 0.843074                | -1.580316 | 0.000000  |
| 7             | 1             | 0           | -0.592569               | -3.128923 | 0.000000  |
| 8             | 1             | 0           | 1.724439                | -2.209778 | 0.000000  |
| 9             | 16            | 0           | 0.365898                | 2.336709  | 0.000000  |
| 10            | 1             | 0           | -0.938562               | 2.650925  | 0.000000  |
| 11            | 8             | 0           | -2.698962               | -1.529892 | 0.000000  |
| 12            | 6             | 0           | 2.451288                | 0.273237  | 0.000000  |
| 13            | 1             | 0           | 2.643097                | 0.876543  | 0.889663  |
| 14            | 1             | 0           | 3.134771                | -0.573078 | 0.000000  |
| 15            | 1             | 0           | 2.643097                | 0.876543  | -0.889663 |

Rotational constants (GHZ): 2.4091089 1.1748879 0.7936995

----- FREQUENCIES AND ROTATIONAL CONSTANTS -----

| INDEX NO. | DOF TYPE | CM-1 (UNSCALED) | CM-1 (SCALED BY ) | SYMMETRY | IR-INTENSITY |
|-----------|----------|-----------------|-------------------|----------|--------------|
| 1         | vib      | 74.68           | 0.00              | A''      | 0.7721       |
| 2         | vib      | 101.65          | 0.00              | A''      | 0.1740       |
| 3         | vib      | 168.11          | 0.00              | A''      | 0.2873       |
| 4         | vib      | 221.66          | 0.00              | A''      | 4.5749       |

|    |     |           |      |     |          |
|----|-----|-----------|------|-----|----------|
| 5  | vib | 253.69    | 0.00 | A'  | 4.1835   |
| 6  | vib | 331.73    | 0.00 | A'' | 19.4333  |
| 7  | vib | 336.97    | 0.00 | A'  | 1.4148   |
| 8  | vib | 424.91    | 0.00 | A'' | 0.2052   |
| 9  | vib | 434.15    | 0.00 | A'  | 13.2937  |
| 10 | vib | 485.65    | 0.00 | A'  | 2.1240   |
| 11 | vib | 554.00    | 0.00 | A'  | 0.1689   |
| 12 | vib | 657.09    | 0.00 | A'' | 2.8666   |
| 13 | vib | 711.33    | 0.00 | A'  | 6.1963   |
| 14 | vib | 757.50    | 0.00 | A'' | 0.4790   |
| 15 | vib | 776.38    | 0.00 | A'  | 1.0272   |
| 16 | vib | 849.03    | 0.00 | A'' | 48.4108  |
| 17 | vib | 888.54    | 0.00 | A'  | 9.8983   |
| 18 | vib | 962.56    | 0.00 | A'  | 35.7733  |
| 19 | vib | 973.13    | 0.00 | A'' | 0.0006   |
| 20 | vib | 1031.35   | 0.00 | A'  | 0.6069   |
| 21 | vib | 1125.57   | 0.00 | A'  | 82.3036  |
| 22 | vib | 1141.57   | 0.00 | A'' | 0.0000   |
| 23 | vib | 1175.90   | 0.00 | A'  | 18.5364  |
| 24 | vib | 1221.37   | 0.00 | A'  | 42.0882  |
| 25 | vib | 1296.19   | 0.00 | A'  | 30.7349  |
| 26 | vib | 1386.45   | 0.00 | A'  | 120.6173 |
| 27 | vib | 1455.41   | 0.00 | A'  | 100.4836 |
| 28 | vib | 1458.76   | 0.00 | A'  | 39.5389  |
| 29 | vib | 1479.06   | 0.00 | A'' | 13.6953  |
| 30 | vib | 1511.00   | 0.00 | A'  | 89.2137  |
| 31 | vib | 1574.42   | 0.00 | A'  | 279.0000 |
| 32 | vib | 1704.86   | 0.00 | A'  | 263.8231 |
| 33 | vib | 1773.38   | 0.00 | A'  | 510.2013 |
| 34 | vib | 2721.29   | 0.00 | A'  | 12.0886  |
| 35 | vib | 3055.01   | 0.00 | A'  | 20.9370  |
| 36 | vib | 3122.38   | 0.00 | A'' | 6.2558   |
| 37 | vib | 3165.11   | 0.00 | A'  | 4.8147   |
| 38 | vib | 3207.84   | 0.00 | A'  | 3.0700   |
| 39 | vib | 3235.52   | 0.00 | A'  | 1.0596   |
| 40 | rot | 0.0803592 | -    |     |          |
| 41 | rot | 0.0391900 | -    |     |          |
| 42 | rot | 0.0264750 | -    |     |          |

----- ZPE & THERMAL CONTRIBUTIONS -----

|                                |            |                |
|--------------------------------|------------|----------------|
| Eelectronic                    | [kJ/mol]   | = -2039513.479 |
| Ezpe                           | [kJ/mol]   | = +285.938     |
| Eelectronic+Ezpe               | [kJ/mol]   | = -2039227.541 |
|                                |            |                |
| Eelectronic                    | [hartrees] | = -776.809552  |
| Ezpe                           | [hartrees] | = +0.108908    |
| Eelectronic+Ezpe               | [hartrees] | = -776.700644  |
|                                |            |                |
| Thermal Correction to Energy   | [kJ/mol]   | = +308.236     |
| Thermal Correction to Enthalpy | [kJ/mol]   | = +310.717     |
| Thermal Correction to Gibbs    | [kJ/mol]   | = +197.015     |

!+++++  
 END OF GAUSSIAN OUTPUT FILENAME: MeSU3-apfd.log  
 !+++++

!+++++  
 GAUSSIAN OUTPUT FILENAME: MeSU3-b2plyp.log  
 !+++++

1) LEVEL OF THEORY: OPT=VTIGHT  
 Charge = 0 Multiplicity = 1 Stoichiometry C5H6N2OS

----- OPTIMIZED GEOMETRY -----

| Center | Atomic | Atomic | Coordinates (Angstroms) |
|--------|--------|--------|-------------------------|
|--------|--------|--------|-------------------------|

| Number | Number | Type | X         | Y         | Z         |
|--------|--------|------|-----------|-----------|-----------|
| 1      | 7      | 0    | -1.229031 | 0.218350  | 0.000000  |
| 2      | 7      | 0    | 1.093002  | -0.231043 | 0.000000  |
| 3      | 6      | 0    | -0.000000 | 0.601058  | 0.000000  |
| 4      | 6      | 0    | -1.553027 | -1.153244 | 0.000000  |
| 5      | 6      | 0    | -0.414189 | -2.067550 | 0.000000  |
| 6      | 6      | 0    | 0.841803  | -1.586874 | 0.000000  |
| 7      | 1      | 0    | -0.599359 | -3.130924 | 0.000000  |
| 8      | 1      | 0    | 1.718081  | -2.219375 | 0.000000  |
| 9      | 16     | 0    | 0.374933  | 2.337497  | 0.000000  |
| 10     | 1      | 0    | -0.924621 | 2.660641  | 0.000000  |
| 11     | 8      | 0    | -2.712499 | -1.526710 | 0.000000  |
| 12     | 6      | 0    | 2.461516  | 0.275111  | 0.000000  |
| 13     | 1      | 0    | 2.650925  | 0.876892  | 0.888363  |
| 14     | 1      | 0    | 3.140692  | -0.572540 | 0.000000  |
| 15     | 1      | 0    | 2.650925  | 0.876892  | -0.888363 |

Rotational constants (GHZ):                    2.4015963                    1.1678067                    0.7896395

----- FREQUENCIES AND ROTATIONAL CONSTANTS -----

| INDEX NO. | DOF | TYPE | CM-1 (UNSCALED) | CM-1 (SCALED BY ) | SYMMETRY | IR-INTENSITY |
|-----------|-----|------|-----------------|-------------------|----------|--------------|
| 1         | vib |      | 75.42           | 0.00              | A''      | 0.5352       |
| 2         | vib |      | 89.85           | 0.00              | A''      | 0.4386       |
| 3         | vib |      | 168.63          | 0.00              | A''      | 0.3338       |
| 4         | vib |      | 218.27          | 0.00              | A''      | 4.1682       |
| 5         | vib |      | 250.16          | 0.00              | A'       | 4.1636       |
| 6         | vib |      | 333.43          | 0.00              | A''      | 20.0040      |
| 7         | vib |      | 338.88          | 0.00              | A'       | 1.1330       |
| 8         | vib |      | 424.39          | 0.00              | A''      | 0.2262       |
| 9         | vib |      | 434.04          | 0.00              | A'       | 12.8524      |
| 10        | vib |      | 480.08          | 0.00              | A'       | 1.9947       |
| 11        | vib |      | 548.48          | 0.00              | A'       | 0.0366       |
| 12        | vib |      | 648.54          | 0.00              | A''      | 2.4133       |
| 13        | vib |      | 706.13          | 0.00              | A'       | 5.6067       |
| 14        | vib |      | 750.41          | 0.00              | A''      | 0.2232       |
| 15        | vib |      | 767.90          | 0.00              | A'       | 0.7537       |
| 16        | vib |      | 842.48          | 0.00              | A''      | 47.7781      |
| 17        | vib |      | 876.46          | 0.00              | A'       | 8.6565       |
| 18        | vib |      | 949.07          | 0.00              | A'       | 36.6744      |
| 19        | vib |      | 965.71          | 0.00              | A''      | 0.0089       |
| 20        | vib |      | 1034.31         | 0.00              | A'       | 1.5487       |
| 21        | vib |      | 1129.60         | 0.00              | A'       | 81.6160      |
| 22        | vib |      | 1153.12         | 0.00              | A''      | 0.0558       |
| 23        | vib |      | 1175.26         | 0.00              | A'       | 31.7330      |
| 24        | vib |      | 1219.69         | 0.00              | A'       | 39.9305      |
| 25        | vib |      | 1283.02         | 0.00              | A'       | 44.3642      |
| 26        | vib |      | 1393.16         | 0.00              | A'       | 121.6475     |
| 27        | vib |      | 1452.14         | 0.00              | A'       | 128.7965     |
| 28        | vib |      | 1482.07         | 0.00              | A'       | 24.3626      |
| 29        | vib |      | 1499.40         | 0.00              | A''      | 12.4015      |
| 30        | vib |      | 1527.98         | 0.00              | A'       | 81.3474      |
| 31        | vib |      | 1546.03         | 0.00              | A'       | 257.6275     |
| 32        | vib |      | 1679.03         | 0.00              | A'       | 154.9870     |
| 33        | vib |      | 1731.19         | 0.00              | A'       | 518.1962     |
| 34        | vib |      | 2726.70         | 0.00              | A'       | 11.6962      |
| 35        | vib |      | 3065.09         | 0.00              | A'       | 21.1470      |
| 36        | vib |      | 3133.48         | 0.00              | A''      | 6.4038       |
| 37        | vib |      | 3170.37         | 0.00              | A'       | 5.3013       |
| 38        | vib |      | 3217.98         | 0.00              | A'       | 2.9035       |
| 39        | vib |      | 3242.61         | 0.00              | A'       | 1.2658       |
| 40        | rot |      | 0.0801086       | -                 |          |              |
| 41        | rot |      | 0.0389538       | -                 |          |              |
| 42        | rot |      | 0.0263395       | -                 |          |              |

----- ZPE & THERMAL CONTRIBUTIONS -----

Eelectronic                    [kJ/mol]    = -2039439.138



Ezpe [kJ/mol] = +285.492  
 Eelectronic+Ezpe [kJ/mol] = -2039153.646

Eelectronic [hartrees] = -776.781237  
 Ezpe [hartrees] = +0.108738  
 Eelectronic+Ezpe [hartrees] = -776.672499

Thermal Correction to Energy [kJ/mol] = +307.927  
 Thermal Correction to Enthalpy [kJ/mol] = +310.408  
 Thermal Correction to Gibbs [kJ/mol] = +196.277

!+++++  
 END OF GAUSSIAN OUTPUT FILENAME: MeSU3-b2plyp.log  
 !+++++

!+++++  
 GAUSSIAN OUTPUT FILENAME: MeSU3-b2plypd3.log  
 !+++++

1)LEVEL OF THEORY: OPT=VTIGHT  
 Charge = 0 Multiplicity = 1 Stoichiometry C5H6N2OS

-----  
 ----- OPTIMIZED GEOMETRY -----  
 -----

| Center Number | Atomic Number | Atomic Type | Coordinates (Angstroms) |           |           |
|---------------|---------------|-------------|-------------------------|-----------|-----------|
|               |               |             | X                       | Y         | Z         |
| 1             | 7             | 0           | -1.229287               | 0.219534  | 0.000000  |
| 2             | 7             | 0           | 1.091882                | -0.231546 | 0.000000  |
| 3             | 6             | 0           | 0.000000                | 0.600925  | 0.000000  |
| 4             | 6             | 0           | -1.553314               | -1.151628 | 0.000000  |
| 5             | 6             | 0           | -0.415116               | -2.066506 | 0.000000  |
| 6             | 6             | 0           | 0.840979                | -1.586902 | 0.000000  |
| 7             | 1             | 0           | -0.601307               | -3.129530 | 0.000000  |
| 8             | 1             | 0           | 1.717186                | -2.219186 | 0.000000  |
| 9             | 16            | 0           | 0.377798                | 2.335168  | 0.000000  |
| 10            | 1             | 0           | -0.921309               | 2.659719  | 0.000000  |
| 11            | 8             | 0           | -2.712756               | -1.524980 | 0.000000  |
| 12            | 6             | 0           | 2.459257                | 0.275331  | 0.000000  |
| 13            | 1             | 0           | 2.647433                | 0.877344  | 0.888319  |
| 14            | 1             | 0           | 3.138837                | -0.571781 | 0.000000  |
| 15            | 1             | 0           | 2.647433                | 0.877344  | -0.888319 |

Rotational constants (GHZ): 2.4061911 1.1684796 0.7904432

-----  
 ----- FREQUENCIES AND ROTATIONAL CONSTANTS -----  
 -----

| INDEX NO. | DOF TYPE | CM-1 (UNSCALED) | CM-1 (SCALED BY ) | SYMMETRY | IR-INTENSITY |
|-----------|----------|-----------------|-------------------|----------|--------------|
| 1         | vib      | 75.50           | 0.00              | A''      | 0.5864       |
| 2         | vib      | 92.49           | 0.00              | A''      | 0.4227       |
| 3         | vib      | 168.21          | 0.00              | A''      | 0.3335       |
| 4         | vib      | 217.70          | 0.00              | A''      | 4.0664       |
| 5         | vib      | 251.47          | 0.00              | A'       | 4.1868       |
| 6         | vib      | 334.67          | 0.00              | A''      | 20.0668      |
| 7         | vib      | 340.03          | 0.00              | A'       | 1.1313       |
| 8         | vib      | 423.90          | 0.00              | A''      | 0.2209       |
| 9         | vib      | 435.17          | 0.00              | A'       | 12.7507      |
| 10        | vib      | 480.92          | 0.00              | A'       | 1.9935       |
| 11        | vib      | 548.93          | 0.00              | A'       | 0.0362       |
| 12        | vib      | 648.24          | 0.00              | A''      | 2.4247       |
| 13        | vib      | 707.67          | 0.00              | A'       | 5.7021       |
| 14        | vib      | 750.22          | 0.00              | A''      | 0.2390       |
| 15        | vib      | 769.38          | 0.00              | A'       | 0.7413       |
| 16        | vib      | 842.23          | 0.00              | A''      | 47.7558      |
| 17        | vib      | 878.10          | 0.00              | A'       | 8.8997       |
| 18        | vib      | 950.31          | 0.00              | A'       | 36.1846      |
| 19        | vib      | 965.45          | 0.00              | A''      | 0.0081       |
| 20        | vib      | 1035.71         | 0.00              | A'       | 1.5063       |

|    |     |           |      |     |          |
|----|-----|-----------|------|-----|----------|
| 21 | vib | 1131.75   | 0.00 | A'  | 82.1268  |
| 22 | vib | 1153.67   | 0.00 | A'' | 0.0554   |
| 23 | vib | 1176.49   | 0.00 | A'  | 29.6581  |
| 24 | vib | 1220.84   | 0.00 | A'  | 40.9385  |
| 25 | vib | 1285.00   | 0.00 | A'  | 43.9173  |
| 26 | vib | 1394.44   | 0.00 | A'  | 118.6809 |
| 27 | vib | 1453.44   | 0.00 | A'  | 132.2774 |
| 28 | vib | 1482.46   | 0.00 | A'  | 23.4395  |
| 29 | vib | 1499.63   | 0.00 | A'' | 12.4453  |
| 30 | vib | 1528.66   | 0.00 | A'  | 78.5694  |
| 31 | vib | 1547.37   | 0.00 | A'  | 260.9020 |
| 32 | vib | 1680.51   | 0.00 | A'  | 156.1802 |
| 33 | vib | 1732.15   | 0.00 | A'  | 517.0345 |
| 34 | vib | 2727.23   | 0.00 | A'  | 11.6619  |
| 35 | vib | 3065.87   | 0.00 | A'  | 21.1050  |
| 36 | vib | 3134.30   | 0.00 | A'' | 6.3852   |
| 37 | vib | 3171.62   | 0.00 | A'  | 5.3010   |
| 38 | vib | 3218.87   | 0.00 | A'  | 2.9121   |
| 39 | vib | 3243.66   | 0.00 | A'  | 1.2528   |
| 40 | rot | 0.0802619 | -    |     |          |
| 41 | rot | 0.0389763 | -    |     |          |
| 42 | rot | 0.0263663 | -    |     |          |

----- ZPE & THERMAL CONTRIBUTIONS -----

Eelectronic [kJ/mol] = -2039475.047  
 Ezpe [kJ/mol] = +285.694  
 Eelectronic+Ezpe [kJ/mol] = -2039189.353

Eelectronic [hartrees] = -776.794914  
 Ezpe [hartrees] = +0.108815  
 Eelectronic+Ezpe [hartrees] = -776.686099

Thermal Correction to Energy [kJ/mol] = +308.097  
 Thermal Correction to Enthalpy [kJ/mol] = +310.576  
 Thermal Correction to Gibbs [kJ/mol] = +196.553

!+++++  
 END OF GAUSSIAN OUTPUT FILENAME: MeSU3-b2plypd3.log  
 !+++++

!+++++  
 GAUSSIAN OUTPUT FILENAME: MeSU3-MeSU1-H2O-TS-d3bj.log  
 !+++++

1) LEVEL OF THEORY: B3LYP/DEF2TZVP  
 Charge = 0 Multiplicity = 1 Stoichiometry C5H8N2O2S

----- OPTIMIZED GEOMETRY -----

| Center Number | Atomic Number | Atomic Type | Coordinates (Angstroms) |           |           |
|---------------|---------------|-------------|-------------------------|-----------|-----------|
|               |               |             | X                       | Y         | Z         |
| 1             | 6             | 0           | 2.327061                | 0.332924  | -0.008063 |
| 2             | 6             | 0           | 1.646848                | -0.955381 | -0.001663 |
| 3             | 7             | 0           | 0.250818                | -0.883158 | -0.015061 |
| 4             | 6             | 0           | -0.421007               | 0.249302  | -0.003778 |
| 5             | 16            | 0           | -2.160176               | 0.252393  | 0.000240  |
| 6             | 7             | 0           | 0.229339                | 1.457253  | 0.004336  |
| 7             | 6             | 0           | 1.607190                | 1.465103  | -0.003065 |
| 8             | 1             | 0           | 3.405815                | 0.354054  | -0.011984 |
| 9             | 1             | 0           | -0.675439               | -2.060047 | -0.057184 |
| 10            | 8             | 0           | -1.651659               | -2.516933 | -0.092065 |
| 11            | 1             | 0           | -1.790764               | -3.002371 | 0.731556  |
| 12            | 1             | 0           | -2.143795               | -1.365017 | -0.024725 |
| 13            | 8             | 0           | 2.216394                | -2.032081 | 0.016953  |
| 14            | 1             | 0           | 2.059917                | 2.446331  | -0.003444 |

|    |   |   |           |          |           |
|----|---|---|-----------|----------|-----------|
| 15 | 6 | 0 | -0.509638 | 2.716780 | 0.014401  |
| 16 | 1 | 0 | -1.137814 | 2.783057 | 0.901501  |
| 17 | 1 | 0 | 0.207394  | 3.533547 | 0.016729  |
| 18 | 1 | 0 | -1.144200 | 2.793230 | -0.867301 |

-----  
Rotational constants (GHZ):                    1.3057321                    1.1535701                    0.6158332  
-----

-----  
----- FREQUENCIES AND ROTATIONAL CONSTANTS -----  
-----

| INDEX NO. | DOF TYPE | CM-1(UNSCALED) | CM-1(SCALED BY ) | SYMMETRY | IR-INTENSITY |
|-----------|----------|----------------|------------------|----------|--------------|
| 1         | vib      | -1052.04       | 0.00             | A        | 1032.9611    |
| 2         | vib      | 77.49          | 0.00             | A        | 10.3680      |
| 3         | vib      | 91.83          | 0.00             | A        | 0.3662       |
| 4         | vib      | 124.77         | 0.00             | A        | 0.2388       |
| 5         | vib      | 164.09         | 0.00             | A        | 1.5044       |
| 6         | vib      | 223.65         | 0.00             | A        | 24.9806      |
| 7         | vib      | 245.34         | 0.00             | A        | 1.6918       |
| 8         | vib      | 332.39         | 0.00             | A        | 26.5348      |
| 9         | vib      | 384.01         | 0.00             | A        | 41.1809      |
| 10        | vib      | 423.05         | 0.00             | A        | 3.4531       |
| 11        | vib      | 457.24         | 0.00             | A        | 20.3946      |
| 12        | vib      | 464.76         | 0.00             | A        | 2.1442       |
| 13        | vib      | 480.46         | 0.00             | A        | 106.9469     |
| 14        | vib      | 535.78         | 0.00             | A        | 30.1407      |
| 15        | vib      | 563.21         | 0.00             | A        | 83.4018      |
| 16        | vib      | 579.55         | 0.00             | A        | 32.2777      |
| 17        | vib      | 666.10         | 0.00             | A        | 2.3008       |
| 18        | vib      | 734.60         | 0.00             | A        | 13.3721      |
| 19        | vib      | 756.07         | 0.00             | A        | 1.9390       |
| 20        | vib      | 802.52         | 0.00             | A        | 3.8239       |
| 21        | vib      | 840.71         | 0.00             | A        | 47.1554      |
| 22        | vib      | 936.41         | 0.00             | A        | 82.6632      |
| 23        | vib      | 972.26         | 0.00             | A        | 0.0812       |
| 24        | vib      | 1049.56        | 0.00             | A        | 3.6202       |
| 25        | vib      | 1090.99        | 0.00             | A        | 382.1779     |
| 26        | vib      | 1145.13        | 0.00             | A        | 86.6283      |
| 27        | vib      | 1149.19        | 0.00             | A        | 0.0895       |
| 28        | vib      | 1181.78        | 0.00             | A        | 11.6117      |
| 29        | vib      | 1215.50        | 0.00             | A        | 549.4835     |
| 30        | vib      | 1231.84        | 0.00             | A        | 34.7457      |
| 31        | vib      | 1281.44        | 0.00             | A        | 21.0456      |
| 32        | vib      | 1387.96        | 0.00             | A        | 240.6102     |
| 33        | vib      | 1433.49        | 0.00             | A        | 374.6794     |
| 34        | vib      | 1466.80        | 0.00             | A        | 332.7715     |
| 35        | vib      | 1479.22        | 0.00             | A        | 13.4427      |
| 36        | vib      | 1480.52        | 0.00             | A        | 27.5392      |
| 37        | vib      | 1520.82        | 0.00             | A        | 73.5605      |
| 38        | vib      | 1543.65        | 0.00             | A        | 175.8749     |
| 39        | vib      | 1610.58        | 0.00             | A        | 351.3221     |
| 40        | vib      | 1681.02        | 0.00             | A        | 114.5058     |
| 41        | vib      | 1746.90        | 0.00             | A        | 770.0922     |
| 42        | vib      | 2153.47        | 0.00             | A        | 1816.8796    |
| 43        | vib      | 3058.51        | 0.00             | A        | 20.5346      |
| 44        | vib      | 3122.00        | 0.00             | A        | 6.4087       |
| 45        | vib      | 3147.87        | 0.00             | A        | 8.9067       |
| 46        | vib      | 3203.88        | 0.00             | A        | 4.1456       |
| 47        | vib      | 3232.21        | 0.00             | A        | 0.7331       |
| 48        | vib      | 3794.49        | 0.00             | A        | 75.9861      |
| 49        | rot      | 0.0435545      | -                |          |              |
| 50        | rot      | 0.0384790      | -                |          |              |
| 51        | rot      | 0.0205420      | -                |          |              |

-----  
----- ZPE & THERMAL CONTRIBUTIONS -----  
-----

Eelectronic                    [kJ/mol]    = -2241482.676  
Ezpe                                [kJ/mol]    = +342.523  
Eelectronic+Ezpe                [kJ/mol]    = -2241140.153  
  
Eelectronic                    [hartrees] = -853.735546

Ezpe [hartrees] = +0.130460  
Eelectronic+Ezpe [hartrees] = -853.605086

Thermal Correction to Energy [kJ/mol] = +368.087  
Thermal Correction to Enthalpy [kJ/mol] = +370.566  
Thermal Correction to Gibbs [kJ/mol] = +249.457

!+++++  
END OF GAUSSIAN OUTPUT FILENAME: MeSU3-MeSU1-H2O-TS-d3bj.log  
!+++++

!+++++  
GAUSSIAN OUTPUT FILENAME: MeSU3-MeSU1-m062x-product.log  
!+++++

1)LEVEL OF THEORY: M062X/DEF2TZVP  
Charge = 0 Multiplicity = 1 Stoichiometry C5H6N2OS

-----  
----- OPTIMIZED GEOMETRY -----  
-----

| Center Number | Atomic Number | Atomic Type | Coordinates (Angstroms) |           |           |
|---------------|---------------|-------------|-------------------------|-----------|-----------|
|               |               |             | X                       | Y         | Z         |
| 1             | 7             | 0           | -1.178469               | 0.042220  | 0.000000  |
| 2             | 7             | 0           | 1.121879                | -0.059618 | 0.000000  |
| 3             | 6             | 0           | 0.000000                | 0.731413  | 0.000000  |
| 4             | 6             | 0           | -1.382238               | -1.342654 | 0.000000  |
| 5             | 6             | 0           | -0.139548               | -2.092603 | 0.000000  |
| 6             | 6             | 0           | 1.024852                | -1.430133 | 0.000000  |
| 7             | 1             | 0           | -0.183374               | -3.169365 | 0.000000  |
| 8             | 1             | 0           | 1.973368                | -1.949013 | 0.000000  |
| 9             | 16            | 0           | 0.045512                | 2.382732  | 0.000000  |
| 10            | 1             | 0           | -2.014630               | 0.611840  | 0.000000  |
| 11            | 8             | 0           | -2.499900               | -1.797747 | 0.000000  |
| 12            | 6             | 0           | 2.433581                | 0.579040  | 0.000000  |
| 13            | 1             | 0           | 2.540310                | 1.207869  | 0.881891  |
| 14            | 1             | 0           | 3.191260                | -0.199534 | 0.000000  |
| 15            | 1             | 0           | 2.540310                | 1.207869  | -0.881891 |

-----  
Rotational constants (GHZ): 2.4038318 1.1823694 0.7964586

-----  
----- FREQUENCIES AND ROTATIONAL CONSTANTS -----  
-----

| INDEX NO. | DOF | TYPE | CM-1 (UNSCALED) | CM-1 (SCALED BY ) | SYMMETRY | IR-INTENSITY |
|-----------|-----|------|-----------------|-------------------|----------|--------------|
| 1         | vib |      | 106.76          | 0.00              | A''      | 0.2433       |
| 2         | vib |      | 129.21          | 0.00              | A''      | 0.9264       |
| 3         | vib |      | 174.74          | 0.00              | A''      | 1.2427       |
| 4         | vib |      | 257.18          | 0.00              | A''      | 3.2747       |
| 5         | vib |      | 281.62          | 0.00              | A'       | 8.2800       |
| 6         | vib |      | 360.99          | 0.00              | A'       | 0.9980       |
| 7         | vib |      | 408.39          | 0.00              | A''      | 7.2693       |
| 8         | vib |      | 460.08          | 0.00              | A'       | 25.5470      |
| 9         | vib |      | 505.12          | 0.00              | A'       | 11.6713      |
| 10        | vib |      | 556.54          | 0.00              | A'       | 0.4134       |
| 11        | vib |      | 666.32          | 0.00              | A''      | 4.7197       |
| 12        | vib |      | 721.04          | 0.00              | A''      | 27.0334      |
| 13        | vib |      | 732.19          | 0.00              | A'       | 3.7533       |
| 14        | vib |      | 765.77          | 0.00              | A''      | 12.4855      |
| 15        | vib |      | 794.79          | 0.00              | A'       | 0.8961       |
| 16        | vib |      | 838.25          | 0.00              | A''      | 69.6427      |
| 17        | vib |      | 942.09          | 0.00              | A'       | 10.1432      |
| 18        | vib |      | 997.29          | 0.00              | A''      | 0.2838       |
| 19        | vib |      | 1056.64         | 0.00              | A'       | 5.9466       |
| 20        | vib |      | 1154.08         | 0.00              | A''      | 0.0731       |
| 21        | vib |      | 1157.27         | 0.00              | A'       | 142.4880     |
| 22        | vib |      | 1193.88         | 0.00              | A'       | 56.2918      |
| 23        | vib |      | 1238.48         | 0.00              | A'       | 41.6551      |
| 24        | vib |      | 1253.65         | 0.00              | A'       | 49.4896      |

|    |     |           |      |     |          |
|----|-----|-----------|------|-----|----------|
| 25 | vib | 1341.61   | 0.00 | A'  | 86.1179  |
| 26 | vib | 1415.22   | 0.00 | A'  | 76.9723  |
| 27 | vib | 1459.00   | 0.00 | A'  | 31.1651  |
| 28 | vib | 1474.25   | 0.00 | A'' | 13.6636  |
| 29 | vib | 1485.37   | 0.00 | A'  | 75.9794  |
| 30 | vib | 1498.75   | 0.00 | A'  | 122.5547 |
| 31 | vib | 1542.05   | 0.00 | A'  | 539.4995 |
| 32 | vib | 1707.20   | 0.00 | A'  | 144.9884 |
| 33 | vib | 1831.13   | 0.00 | A'  | 766.5887 |
| 34 | vib | 3089.17   | 0.00 | A'  | 15.3747  |
| 35 | vib | 3161.27   | 0.00 | A'' | 2.6869   |
| 36 | vib | 3187.73   | 0.00 | A'  | 5.1991   |
| 37 | vib | 3235.71   | 0.00 | A'  | 3.0148   |
| 38 | vib | 3278.57   | 0.00 | A'  | 3.8822   |
| 39 | vib | 3601.03   | 0.00 | A'  | 73.4497  |
| 40 | rot | 0.0801832 | -    |     |          |
| 41 | rot | 0.0394396 | -    |     |          |
| 42 | rot | 0.0265670 | -    |     |          |

----- ZPE & THERMAL CONTRIBUTIONS -----

|                                |            |                |
|--------------------------------|------------|----------------|
| Eelectronic                    | [kJ/mol]   | = -2040205.075 |
| Ezpe                           | [kJ/mol]   | = +299.428     |
| Eelectronic+Ezpe               | [kJ/mol]   | = -2039905.647 |
| Eelectronic                    | [hartrees] | = -777.072967  |
| Ezpe                           | [hartrees] | = +0.114046    |
| Eelectronic+Ezpe               | [hartrees] | = -776.958921  |
| Thermal Correction to Energy   | [kJ/mol]   | = +320.117     |
| Thermal Correction to Enthalpy | [kJ/mol]   | = +322.595     |
| Thermal Correction to Gibbs    | [kJ/mol]   | = +212.689     |

!+++++  
 END OF GAUSSIAN OUTPUT FILENAME: MeSU3-MeSU1-m062x-product.log

!+++++  
 GAUSSIAN OUTPUT FILENAME: MeSU3-MeSU1-m062x-reactant.log

1)LEVEL OF THEORY: M062X/DEF2TZVP  
 Charge = 0 Multiplicity = 1 Stoichiometry C5H6N2OS

----- OPTIMIZED GEOMETRY -----

| Center Number | Atomic Number | Atomic Type | Coordinates (Angstroms) |           |           |
|---------------|---------------|-------------|-------------------------|-----------|-----------|
|               |               |             | X                       | Y         | Z         |
| 1             | 7             | 0           | -1.224433               | 0.225832  | 0.000000  |
| 2             | 7             | 0           | 1.085078                | -0.236547 | 0.000000  |
| 3             | 6             | 0           | -0.000000               | 0.598294  | 0.000000  |
| 4             | 6             | 0           | -1.555607               | -1.140670 | 0.000000  |
| 5             | 6             | 0           | -0.420342               | -2.065707 | 0.000000  |
| 6             | 6             | 0           | 0.829930                | -1.590108 | 0.000000  |
| 7             | 1             | 0           | -0.615943               | -3.127094 | 0.000000  |
| 8             | 1             | 0           | 1.706023                | -2.224253 | 0.000000  |
| 9             | 16            | 0           | 0.388670                | 2.326587  | 0.000000  |
| 10            | 1             | 0           | -0.906154               | 2.659057  | 0.000000  |
| 11            | 8             | 0           | -2.706917               | -1.506846 | 0.000000  |
| 12            | 6             | 0           | 2.450023                | 0.269564  | 0.000000  |
| 13            | 1             | 0           | 2.636599                | 0.872635  | 0.888888  |
| 14            | 1             | 0           | 3.130953                | -0.576844 | 0.000000  |
| 15            | 1             | 0           | 2.636599                | 0.872635  | -0.888888 |

Rotational constants (GHZ):                    2.4229148                    1.1749578                    0.7952174

-----  
 ----- FREQUENCIES AND ROTATIONAL CONSTANTS -----  
 -----

| INDEX NO. | DOF TYPE | CM-1 (UNSCALED) | CM-1 (SCALED BY ) | SYMMETRY | IR-INTENSITY |
|-----------|----------|-----------------|-------------------|----------|--------------|
| 1         | vib      | 78.42           | 0.00              | A''      | 0.7307       |
| 2         | vib      | 118.85          | 0.00              | A''      | 0.7448       |
| 3         | vib      | 172.60          | 0.00              | A''      | 0.2970       |
| 4         | vib      | 228.89          | 0.00              | A''      | 2.5888       |
| 5         | vib      | 261.45          | 0.00              | A'       | 4.5464       |
| 6         | vib      | 350.06          | 0.00              | A'       | 1.2324       |
| 7         | vib      | 403.27          | 0.00              | A''      | 22.1485      |
| 8         | vib      | 428.32          | 0.00              | A''      | 0.1205       |
| 9         | vib      | 441.25          | 0.00              | A'       | 12.6871      |
| 10        | vib      | 485.38          | 0.00              | A'       | 2.1608       |
| 11        | vib      | 557.70          | 0.00              | A'       | 0.1486       |
| 12        | vib      | 659.94          | 0.00              | A''      | 2.6960       |
| 13        | vib      | 714.88          | 0.00              | A'       | 7.0876       |
| 14        | vib      | 764.78          | 0.00              | A''      | 0.2250       |
| 15        | vib      | 778.24          | 0.00              | A'       | 1.0927       |
| 16        | vib      | 855.66          | 0.00              | A''      | 51.8163      |
| 17        | vib      | 894.14          | 0.00              | A'       | 8.8544       |
| 18        | vib      | 960.81          | 0.00              | A'       | 37.6023      |
| 19        | vib      | 994.13          | 0.00              | A''      | 0.0628       |
| 20        | vib      | 1043.17         | 0.00              | A'       | 1.0994       |
| 21        | vib      | 1135.89         | 0.00              | A'       | 80.1588      |
| 22        | vib      | 1149.93         | 0.00              | A''      | 0.0560       |
| 23        | vib      | 1184.69         | 0.00              | A'       | 16.3060      |
| 24        | vib      | 1225.27         | 0.00              | A'       | 61.0645      |
| 25        | vib      | 1308.25         | 0.00              | A'       | 35.2205      |
| 26        | vib      | 1402.38         | 0.00              | A'       | 103.7718     |
| 27        | vib      | 1466.86         | 0.00              | A'       | 185.6890     |
| 28        | vib      | 1479.50         | 0.00              | A'       | 7.6228       |
| 29        | vib      | 1491.19         | 0.00              | A''      | 13.1783      |
| 30        | vib      | 1525.12         | 0.00              | A'       | 92.6502      |
| 31        | vib      | 1590.30         | 0.00              | A'       | 323.7062     |
| 32        | vib      | 1723.23         | 0.00              | A'       | 305.5921     |
| 33        | vib      | 1808.08         | 0.00              | A'       | 575.7831     |
| 34        | vib      | 2745.23         | 0.00              | A'       | 14.9103      |
| 35        | vib      | 3074.28         | 0.00              | A'       | 17.0958      |
| 36        | vib      | 3141.36         | 0.00              | A''      | 4.2421       |
| 37        | vib      | 3180.94         | 0.00              | A'       | 3.6254       |
| 38        | vib      | 3226.35         | 0.00              | A'       | 2.3161       |
| 39        | vib      | 3259.35         | 0.00              | A'       | 0.3077       |
| 40        | rot      | 0.0808197       | -                 |          |              |
| 41        | rot      | 0.0391924       | -                 |          |              |
| 42        | rot      | 0.0265256       | -                 |          |              |

-----  
 ----- ZPE & THERMAL CONTRIBUTIONS -----  
 -----

|                                |            |                |
|--------------------------------|------------|----------------|
| Eelectronic                    | [kJ/mol]   | = -2040121.849 |
| Ezpe                           | [kJ/mol]   | = +288.960     |
| Eelectronic+Ezpe               | [kJ/mol]   | = -2039832.889 |
| Eelectronic                    | [hartrees] | = -777.041268  |
| Ezpe                           | [hartrees] | = +0.110059    |
| Eelectronic+Ezpe               | [hartrees] | = -776.931209  |
| Thermal Correction to Energy   | [kJ/mol]   | = +310.762     |
| Thermal Correction to Enthalpy | [kJ/mol]   | = +313.241     |
| Thermal Correction to Gibbs    | [kJ/mol]   | = +200.811     |

!+++++  
 END OF GAUSSIAN OUTPUT FILENAME: MeSU3-MeSU1-m062x-reactant.log  
 !+++++

!+++++  
 GAUSSIAN OUTPUT FILENAME: MeSU3-wb97xd.log  
 !+++++

1)LEVEL OF THEORY: OPT=VTIGHT  
 Charge = 0 Multiplicity = 1 Stoichiometry C5H6N2OS

-----  
 ----- OPTIMIZED GEOMETRY -----  
 -----

| Center Number | Atomic Number | Atomic Type | Coordinates (Angstroms) |           |           |
|---------------|---------------|-------------|-------------------------|-----------|-----------|
|               |               |             | X                       | Y         | Z         |
| 1             | 7             | 0           | -1.222003               | 0.216973  | 0.000000  |
| 2             | 7             | 0           | 1.088885                | -0.230487 | 0.000000  |
| 3             | 6             | 0           | -0.000000               | 0.598363  | 0.000000  |
| 4             | 6             | 0           | -1.547389               | -1.148149 | 0.000000  |
| 5             | 6             | 0           | -0.407716               | -2.064953 | 0.000000  |
| 6             | 6             | 0           | 0.839469                | -1.583804 | 0.000000  |
| 7             | 1             | 0           | -0.594127               | -3.128355 | 0.000000  |
| 8             | 1             | 0           | 1.716528                | -2.216675 | 0.000000  |
| 9             | 16            | 0           | 0.367767                | 2.331043  | 0.000000  |
| 10            | 1             | 0           | -0.930438               | 2.655465  | 0.000000  |
| 11            | 8             | 0           | -2.698038               | -1.519414 | 0.000000  |
| 12            | 6             | 0           | 2.451930                | 0.275075  | 0.000000  |
| 13            | 1             | 0           | 2.643261                | 0.876796  | 0.889461  |
| 14            | 1             | 0           | 3.135611                | -0.570003 | 0.000000  |
| 15            | 1             | 0           | 2.643261                | 0.876796  | -0.889461 |

Rotational constants (GHZ):                    2.4115864                    1.1779382                    0.7953583

-----  
 ----- FREQUENCIES AND ROTATIONAL CONSTANTS -----  
 -----

| INDEX NO. | DOF TYPE | CM-1 (UNSCALED) | CM-1 (SCALED BY ) | SYMMETRY | IR-INTENSITY |
|-----------|----------|-----------------|-------------------|----------|--------------|
| 1         | vib      | 75.67           | 0.00              | A''      | 0.7453       |
| 2         | vib      | 86.85           | 0.00              | A''      | 0.2368       |
| 3         | vib      | 171.36          | 0.00              | A''      | 0.3504       |
| 4         | vib      | 222.95          | 0.00              | A''      | 4.0829       |
| 5         | vib      | 253.58          | 0.00              | A'       | 4.5425       |
| 6         | vib      | 343.95          | 0.00              | A''      | 21.3831      |
| 7         | vib      | 344.69          | 0.00              | A'       | 1.2730       |
| 8         | vib      | 429.98          | 0.00              | A''      | 0.1970       |
| 9         | vib      | 441.72          | 0.00              | A'       | 12.7691      |
| 10        | vib      | 488.15          | 0.00              | A'       | 2.1251       |
| 11        | vib      | 558.74          | 0.00              | A'       | 0.0434       |
| 12        | vib      | 663.03          | 0.00              | A''      | 3.0651       |
| 13        | vib      | 715.11          | 0.00              | A'       | 6.1129       |
| 14        | vib      | 766.36          | 0.00              | A''      | 0.3196       |
| 15        | vib      | 780.67          | 0.00              | A'       | 0.8222       |
| 16        | vib      | 855.75          | 0.00              | A''      | 51.9434      |
| 17        | vib      | 891.00          | 0.00              | A'       | 8.0886       |
| 18        | vib      | 963.74          | 0.00              | A'       | 38.7176      |
| 19        | vib      | 990.52          | 0.00              | A''      | 0.0045       |
| 20        | vib      | 1045.85         | 0.00              | A'       | 0.6791       |
| 21        | vib      | 1140.47         | 0.00              | A'       | 79.7535      |
| 22        | vib      | 1153.23         | 0.00              | A''      | 0.0279       |
| 23        | vib      | 1187.85         | 0.00              | A'       | 16.9804      |
| 24        | vib      | 1232.76         | 0.00              | A'       | 48.5616      |
| 25        | vib      | 1308.13         | 0.00              | A'       | 34.7248      |
| 26        | vib      | 1406.09         | 0.00              | A'       | 105.6050     |
| 27        | vib      | 1470.36         | 0.00              | A'       | 156.7859     |
| 28        | vib      | 1483.30         | 0.00              | A'       | 5.6583       |
| 29        | vib      | 1490.73         | 0.00              | A''      | 13.9213      |
| 30        | vib      | 1524.54         | 0.00              | A'       | 98.4547      |
| 31        | vib      | 1588.14         | 0.00              | A'       | 301.7228     |
| 32        | vib      | 1721.52         | 0.00              | A'       | 269.7321     |
| 33        | vib      | 1797.54         | 0.00              | A'       | 575.0221     |
| 34        | vib      | 2746.90         | 0.00              | A'       | 10.9843      |
| 35        | vib      | 3060.89         | 0.00              | A'       | 21.1594      |
| 36        | vib      | 3130.98         | 0.00              | A''      | 6.5635       |
| 37        | vib      | 3169.84         | 0.00              | A'       | 5.6603       |
| 38        | vib      | 3219.63         | 0.00              | A'       | 2.9407       |
| 39        | vib      | 3248.77         | 0.00              | A'       | 0.7738       |
| 40        | rot      | 0.0804419       | -                 |          |              |

```

41      rot      0.0392918      -
42      rot      0.0265303      -

```

----- ZPE & THERMAL CONTRIBUTIONS -----

```

Eelectronic      [kJ/mol]      = -2040222.488
Ezpe             [kJ/mol]      = +288.128
Eelectronic+Ezpe [kJ/mol]      = -2039934.360

Eelectronic      [hartrees]     = -777.079599
Ezpe             [hartrees]     = +0.109742
Eelectronic+Ezpe [hartrees]     = -776.969857

Thermal Correction to Energy [kJ/mol] = +310.318
Thermal Correction to Enthalpy [kJ/mol] = +312.797
Thermal Correction to Gibbs   [kJ/mol] = +199.073

```

```

!+++++
END OF GAUSSIAN OUTPUT FILENAME: MeSU3-wb97xd.log
!+++++

```

```

!+++++
GAUSSIAN OUTPUT FILENAME: NNHS-m062x.log
!+++++

```

```

1)LEVEL OF THEORY: OPT=VTIGHT
Charge = 0 Multiplicity = 1 Stoichiometry C4H4N2S

```

----- OPTIMIZED GEOMETRY -----

| Center Number | Atomic Number | Atomic Type | Coordinates (Angstroms) |           |          |
|---------------|---------------|-------------|-------------------------|-----------|----------|
|               |               |             | X                       | Y         | Z        |
| 1             | 6             | 0           | 1.264011                | -0.087362 | 0.000000 |
| 2             | 7             | 0           | -1.072135               | -0.249731 | 0.000000 |
| 3             | 6             | 0           | 0.000000                | 0.600922  | 0.000000 |
| 4             | 6             | 0           | 1.301941                | -1.436830 | 0.000000 |
| 5             | 6             | 0           | 0.075907                | -2.166210 | 0.000000 |
| 6             | 7             | 0           | -1.076847               | -1.578182 | 0.000000 |
| 7             | 1             | 0           | 0.053209                | -3.247040 | 0.000000 |
| 8             | 16            | 0           | -0.204390               | 2.240665  | 0.000000 |
| 9             | 1             | 0           | -1.988876               | 0.178702  | 0.000000 |
| 10            | 1             | 0           | 2.241847                | -1.972625 | 0.000000 |
| 11            | 1             | 0           | 2.155779                | 0.522600  | 0.000000 |

```

Rotational constants (GHZ):          5.9018673          1.6972436          1.3181682

```

----- FREQUENCIES AND ROTATIONAL CONSTANTS -----

| INDEX NO. | DOF TYPE | CM-1 (UNSCALED) | CM-1 (SCALED BY ) | SYMMETRY | IR-INTENSITY |
|-----------|----------|-----------------|-------------------|----------|--------------|
| 1         | vib      | 147.83          | 0.00              | A''      | 1.0380       |
| 2         | vib      | 311.40          | 0.00              | A'       | 4.0735       |
| 3         | vib      | 369.24          | 0.00              | A''      | 1.6533       |
| 4         | vib      | 468.12          | 0.00              | A'       | 10.8309      |
| 5         | vib      | 506.45          | 0.00              | A''      | 6.9272       |
| 6         | vib      | 632.38          | 0.00              | A'       | 5.9123       |
| 7         | vib      | 736.26          | 0.00              | A''      | 6.3073       |
| 8         | vib      | 770.67          | 0.00              | A'       | 5.8864       |
| 9         | vib      | 789.80          | 0.00              | A''      | 82.6958      |
| 10        | vib      | 844.19          | 0.00              | A''      | 3.4376       |
| 11        | vib      | 950.53          | 0.00              | A''      | 0.2674       |
| 12        | vib      | 1029.92         | 0.00              | A'       | 49.3626      |
| 13        | vib      | 1044.20         | 0.00              | A''      | 0.0008       |
| 14        | vib      | 1044.73         | 0.00              | A'       | 9.1304       |
| 15        | vib      | 1117.32         | 0.00              | A'       | 84.5969      |
| 16        | vib      | 1193.74         | 0.00              | A'       | 11.8632      |



|    |     |           |      |    |          |
|----|-----|-----------|------|----|----------|
| 17 | vib | 1228.60   | 0.00 | A' | 150.7407 |
| 18 | vib | 1309.42   | 0.00 | A' | 77.7520  |
| 19 | vib | 1402.73   | 0.00 | A' | 4.5970   |
| 20 | vib | 1419.65   | 0.00 | A' | 1.6399   |
| 21 | vib | 1516.21   | 0.00 | A' | 79.9953  |
| 22 | vib | 1620.97   | 0.00 | A' | 161.2372 |
| 23 | vib | 1690.81   | 0.00 | A' | 38.1856  |
| 24 | vib | 3223.58   | 0.00 | A' | 1.7443   |
| 25 | vib | 3239.53   | 0.00 | A' | 0.6267   |
| 26 | vib | 3251.85   | 0.00 | A' | 0.9260   |
| 27 | vib | 3585.89   | 0.00 | A' | 77.2030  |
| 28 | rot | 0.1968651 | -    |    |          |
| 29 | rot | 0.0566140 | -    |    |          |
| 30 | rot | 0.0439694 | -    |    |          |

----- ZPE & THERMAL CONTRIBUTIONS -----

|                                |            |                |
|--------------------------------|------------|----------------|
| Eelectronic                    | [kJ/mol]   | = -1739334.285 |
| Ezpe                           | [kJ/mol]   | = +212.014     |
| Eelectronic+Ezpe               | [kJ/mol]   | = -1739122.271 |
| Eelectronic                    | [hartrees] | = -662.477351  |
| Ezpe                           | [hartrees] | = +0.080752    |
| Eelectronic+Ezpe               | [hartrees] | = -662.396599  |
| Thermal Correction to Energy   | [kJ/mol]   | = +226.195     |
| Thermal Correction to Enthalpy | [kJ/mol]   | = +228.673     |
| Thermal Correction to Gibbs    | [kJ/mol]   | = +133.832     |

!+++++  
 END OF GAUSSIAN OUTPUT FILENAME: NNHS-m062x.log  
 !+++++

!+++++  
 GAUSSIAN OUTPUT FILENAME: NNSH-m062x.log  
 !+++++

1)LEVEL OF THEORY: OPT=VTIGHT  
 Charge = 0 Multiplicity = 1 Stoichiometry C4H4N2S

----- OPTIMIZED GEOMETRY -----

| Center Number | Atomic Number | Atomic Type | Coordinates (Angstroms) |           |           |
|---------------|---------------|-------------|-------------------------|-----------|-----------|
|               |               |             | X                       | Y         | Z         |
| 1             | 6             | 0           | 1.235528                | -0.197855 | 0.000000  |
| 2             | 7             | 0           | -1.160456               | -0.181731 | -0.000000 |
| 3             | 6             | 0           | 0.000000                | 0.460026  | -0.000000 |
| 4             | 6             | 0           | 1.203631                | -1.566637 | 0.000000  |
| 5             | 6             | 0           | -0.049217               | -2.180185 | 0.000000  |
| 6             | 7             | 0           | -1.182623               | -1.501559 | -0.000000 |
| 7             | 1             | 0           | -0.153864               | -3.257514 | 0.000000  |
| 8             | 16            | 0           | -0.042327               | 2.216929  | -0.000000 |
| 9             | 1             | 0           | -1.379411               | 2.273676  | -0.000000 |
| 10            | 1             | 0           | 2.110211                | -2.156669 | 0.000000  |
| 11            | 1             | 0           | 2.162198                | 0.360586  | 0.000000  |

Rotational constants (GHZ):                    5.9353891                    1.6874750                    1.3139183

----- FREQUENCIES AND ROTATIONAL CONSTANTS -----

| INDEX NO. | DOF TYPE | CM-1 (UNSCALED) | CM-1 (SCALED BY ) | SYMMETRY | IR-INTENSITY |
|-----------|----------|-----------------|-------------------|----------|--------------|
| 1         | vib      | 176.81          | 0.00              | A''      | 1.4020       |
| 2         | vib      | 280.23          | 0.00              | A'       | 8.5472       |
| 3         | vib      | 298.90          | 0.00              | A''      | 22.2969      |
| 4         | vib      | 384.66          | 0.00              | A''      | 0.1840       |

|    |     |           |      |     |         |
|----|-----|-----------|------|-----|---------|
| 5  | vib | 439.44    | 0.00 | A'  | 0.4695  |
| 6  | vib | 499.18    | 0.00 | A'' | 0.5151  |
| 7  | vib | 641.89    | 0.00 | A'  | 0.1171  |
| 8  | vib | 761.79    | 0.00 | A'  | 11.1047 |
| 9  | vib | 777.25    | 0.00 | A'' | 9.1083  |
| 10 | vib | 829.13    | 0.00 | A'' | 26.0279 |
| 11 | vib | 911.79    | 0.00 | A'  | 9.8251  |
| 12 | vib | 967.49    | 0.00 | A'' | 0.0097  |
| 13 | vib | 1028.66   | 0.00 | A'' | 0.0457  |
| 14 | vib | 1042.60   | 0.00 | A'  | 4.5978  |
| 15 | vib | 1072.69   | 0.00 | A'  | 2.3147  |
| 16 | vib | 1123.75   | 0.00 | A'  | 24.5229 |
| 17 | vib | 1180.81   | 0.00 | A'  | 48.9611 |
| 18 | vib | 1184.67   | 0.00 | A'  | 1.8022  |
| 19 | vib | 1239.11   | 0.00 | A'  | 25.6091 |
| 20 | vib | 1439.52   | 0.00 | A'  | 28.5083 |
| 21 | vib | 1464.25   | 0.00 | A'  | 58.1258 |
| 22 | vib | 1621.40   | 0.00 | A'  | 0.5135  |
| 23 | vib | 1650.39   | 0.00 | A'  | 39.6660 |
| 24 | vib | 2739.18   | 0.00 | A'  | 8.3515  |
| 25 | vib | 3215.32   | 0.00 | A'  | 0.3208  |
| 26 | vib | 3223.85   | 0.00 | A'  | 3.1603  |
| 27 | vib | 3237.45   | 0.00 | A'  | 3.2594  |
| 28 | rot | 0.1979833 | -    |     |         |
| 29 | rot | 0.0562881 | -    |     |         |
| 30 | rot | 0.0438276 | -    |     |         |

----- ZPE & THERMAL CONTRIBUTIONS -----

Eelectronic [kJ/mol] = -1739301.081  
 Ezpe [kJ/mol] = +199.969  
 Eelectronic+Ezpe [kJ/mol] = -1739101.112

Eelectronic [hartrees] = -662.464704  
 Ezpe [hartrees] = +0.076164  
 Eelectronic+Ezpe [hartrees] = -662.388540

Thermal Correction to Energy [kJ/mol] = +215.144  
 Thermal Correction to Enthalpy [kJ/mol] = +217.622  
 Thermal Correction to Gibbs [kJ/mol] = +121.314

!+++++  
 END OF GAUSSIAN OUTPUT FILENAME: NNSH-m062x.log  
 !+++++

!+++++  
 GAUSSIAN OUTPUT FILENAME: NNSH-NNHS-H2O-TS-d3bj.log  
 !+++++

1)LEVEL OF THEORY: B3LYP/DEF2TZVP  
 Charge = 0 Multiplicity = 1 Stoichiometry C4H6N2OS

----- OPTIMIZED GEOMETRY -----

| Center Number | Atomic Number | Atomic Type | Coordinates (Angstroms) |           |           |
|---------------|---------------|-------------|-------------------------|-----------|-----------|
|               |               |             | X                       | Y         | Z         |
| 1             | 6             | 0           | -2.337900               | 0.743744  | 0.001084  |
| 2             | 7             | 0           | -1.236018               | 1.464219  | -0.014384 |
| 3             | 7             | 0           | -0.067021               | 0.841168  | -0.017910 |
| 4             | 6             | 0           | 0.060434                | -0.503120 | -0.000940 |
| 5             | 16            | 0           | 1.641580                | -1.211825 | -0.005267 |
| 6             | 6             | 0           | -1.111336               | -1.294012 | 0.015407  |
| 7             | 6             | 0           | -2.321371               | -0.660511 | 0.015421  |
| 8             | 1             | 0           | -3.263599               | 1.303938  | 0.002188  |
| 9             | 1             | 0           | 1.191171                | 1.482357  | -0.033519 |
| 10            | 8             | 0           | 2.311346                | 1.521667  | -0.076732 |

|    |   |   |           |           |           |
|----|---|---|-----------|-----------|-----------|
| 11 | 1 | 0 | 2.659148  | 1.874987  | 0.752353  |
| 12 | 1 | 0 | 2.311039  | 0.288591  | -0.035850 |
| 13 | 1 | 0 | -3.249152 | -1.217380 | 0.026462  |
| 14 | 1 | 0 | -1.022338 | -2.370936 | 0.026723  |

-----  
Rotational constants (GHZ):                   2.9069462                   1.3453621                   0.9219276  
-----

-----  
----- FREQUENCIES AND ROTATIONAL CONSTANTS -----  
-----

| INDEX NO. | DOF TYPE | CM-1(UNSCALED) | CM-1(SCALED BY ) | SYMMETRY | IR-INTENSITY |
|-----------|----------|----------------|------------------|----------|--------------|
| 1         | vib      | -1297.78       | 0.00             | A        | 544.2205     |
| 2         | vib      | 94.07          | 0.00             | A        | 8.1191       |
| 3         | vib      | 167.85         | 0.00             | A        | 1.0414       |
| 4         | vib      | 281.27         | 0.00             | A        | 44.8230      |
| 5         | vib      | 387.63         | 0.00             | A        | 1.8727       |
| 6         | vib      | 393.25         | 0.00             | A        | 55.3269      |
| 7         | vib      | 438.79         | 0.00             | A        | 8.1720       |
| 8         | vib      | 468.75         | 0.00             | A        | 50.9676      |
| 9         | vib      | 492.58         | 0.00             | A        | 102.2588     |
| 10        | vib      | 509.76         | 0.00             | A        | 9.4765       |
| 11        | vib      | 596.43         | 0.00             | A        | 65.1954      |
| 12        | vib      | 675.64         | 0.00             | A        | 10.0207      |
| 13        | vib      | 765.01         | 0.00             | A        | 11.4023      |
| 14        | vib      | 766.10         | 0.00             | A        | 18.9896      |
| 15        | vib      | 821.02         | 0.00             | A        | 29.2511      |
| 16        | vib      | 941.60         | 0.00             | A        | 0.0305       |
| 17        | vib      | 1016.93        | 0.00             | A        | 0.1251       |
| 18        | vib      | 1051.18        | 0.00             | A        | 217.9944     |
| 19        | vib      | 1055.16        | 0.00             | A        | 28.8746      |
| 20        | vib      | 1112.81        | 0.00             | A        | 126.6240     |
| 21        | vib      | 1163.25        | 0.00             | A        | 78.4705      |
| 22        | vib      | 1181.76        | 0.00             | A        | 32.4548      |
| 23        | vib      | 1212.27        | 0.00             | A        | 680.6125     |
| 24        | vib      | 1246.10        | 0.00             | A        | 458.2369     |
| 25        | vib      | 1258.93        | 0.00             | A        | 1252.0023    |
| 26        | vib      | 1389.38        | 0.00             | A        | 240.8980     |
| 27        | vib      | 1449.73        | 0.00             | A        | 286.6804     |
| 28        | vib      | 1460.63        | 0.00             | A        | 755.1771     |
| 29        | vib      | 1541.53        | 0.00             | A        | 125.2013     |
| 30        | vib      | 1566.36        | 0.00             | A        | 17.7242      |
| 31        | vib      | 1628.69        | 0.00             | A        | 66.9933      |
| 32        | vib      | 1914.09        | 0.00             | A        | 730.7416     |
| 33        | vib      | 3182.96        | 0.00             | A        | 1.6956       |
| 34        | vib      | 3196.63        | 0.00             | A        | 7.9473       |
| 35        | vib      | 3210.57        | 0.00             | A        | 2.1760       |
| 36        | vib      | 3792.16        | 0.00             | A        | 61.6777      |
| 37        | rot      | 0.0969653      | -                |          |              |
| 38        | rot      | 0.0448764      | -                |          |              |
| 39        | rot      | 0.0307522      | -                |          |              |

-----  
----- ZPE & THERMAL CONTRIBUTIONS -----  
-----

|                                |            |                |
|--------------------------------|------------|----------------|
| Eelectronic                    | [kJ/mol]   | = -1940502.327 |
| Ezpe                           | [kJ/mol]   | = +253.794     |
| Eelectronic+Ezpe               | [kJ/mol]   | = -1940248.533 |
| Eelectronic                    | [hartrees] | = -739.098201  |
| Ezpe                           | [hartrees] | = +0.096665    |
| Eelectronic+Ezpe               | [hartrees] | = -739.001536  |
| Thermal Correction to Energy   | [kJ/mol]   | = +272.309     |
| Thermal Correction to Enthalpy | [kJ/mol]   | = +274.790     |
| Thermal Correction to Gibbs    | [kJ/mol]   | = +170.046     |

!+++++  
END OF GAUSSIAN OUTPUT FILENAME: NNSH-NNHS-H2O-TS-d3bj.log  
!+++++

!+++++  
 GAUSSIAN OUTPUT FILENAME: NSU3-dimer-reactant-qb3.log  
 !+++++

1)LEVEL OF THEORY: CBS-QB3  
 Charge = 0 Multiplicity = 1 Stoichiometry C6H6N6O2S2

-----  
 ----- OPTIMIZED GEOMETRY -----  
 -----

| Center Number | Atomic Number | Atomic Type | Coordinates (Angstroms) |           |           |
|---------------|---------------|-------------|-------------------------|-----------|-----------|
|               |               |             | X                       | Y         | Z         |
| 1             | 7             | 0           | 0.466742                | 1.772637  | 0.000045  |
| 2             | 7             | 0           | 2.680555                | 2.499203  | -0.000054 |
| 3             | 6             | 0           | 1.742230                | 1.507871  | 0.000013  |
| 4             | 6             | 0           | 0.045497                | 3.104122  | 0.000009  |
| 5             | 6             | 0           | 1.127439                | 4.111979  | -0.000063 |
| 6             | 7             | 0           | 2.382499                | 3.819735  | -0.000090 |
| 7             | 1             | 0           | 0.864271                | 5.163389  | -0.000092 |
| 8             | 16            | 0           | 2.382499                | -0.128940 | 0.000055  |
| 9             | 1             | 0           | 1.149901                | -0.736682 | 0.000110  |
| 10            | 8             | 0           | -1.132596               | 3.408121  | 0.000014  |
| 11            | 1             | 0           | 3.667713                | 2.289341  | -0.000075 |
| 12            | 7             | 0           | -0.466742               | -1.772637 | 0.000045  |
| 13            | 7             | 0           | -2.680555               | -2.499203 | -0.000054 |
| 14            | 6             | 0           | -1.742230               | -1.507871 | 0.000013  |
| 15            | 6             | 0           | -0.045497               | -3.104122 | 0.000009  |
| 16            | 6             | 0           | -1.127439               | -4.111979 | -0.000063 |
| 17            | 7             | 0           | -2.382499               | -3.819735 | -0.000090 |
| 18            | 1             | 0           | -0.864271               | -5.163389 | -0.000092 |
| 19            | 16            | 0           | -2.382499               | 0.128940  | 0.000055  |
| 20            | 1             | 0           | -1.149901               | 0.736682  | 0.000110  |
| 21            | 8             | 0           | 1.132596                | -3.408121 | 0.000014  |
| 22            | 1             | 0           | -3.667713               | -2.289341 | -0.000075 |

-----  
 Rotational constants (GHZ):                    0.7619320                    0.2473812                    0.1867484

-----  
 ----- FREQUENCIES AND ROTATIONAL CONSTANTS -----  
 -----

| INDEX NO. | DOF TYPE | CM-1 (UNSCALED) | CM-1 (SCALED BY 0.99) | SYMMETRY | IR-INTENSITY |
|-----------|----------|-----------------|-----------------------|----------|--------------|
| 1         | vib      | 25.25           | 24.99                 | A        | 0.7224       |
| 2         | vib      | 36.54           | 36.17                 | A        | 7.5956       |
| 3         | vib      | 60.43           | 59.83                 | B        | 0.0000       |
| 4         | vib      | 76.46           | 75.70                 | B        | 23.3149      |
| 5         | vib      | 76.59           | 75.82                 | A        | 0.0000       |
| 6         | vib      | 96.95           | 95.98                 | A        | 0.0000       |
| 7         | vib      | 112.62          | 111.49                | B        | 0.0000       |
| 8         | vib      | 117.45          | 116.27                | A        | 0.3764       |
| 9         | vib      | 161.24          | 159.63                | A        | 0.2877       |
| 10        | vib      | 169.75          | 168.05                | B        | 0.0000       |
| 11        | vib      | 265.96          | 263.30                | A        | 0.0000       |
| 12        | vib      | 280.89          | 278.08                | B        | 5.9411       |
| 13        | vib      | 413.99          | 409.85                | A        | 0.0000       |
| 14        | vib      | 418.06          | 413.88                | B        | 8.1942       |
| 15        | vib      | 430.42          | 426.12                | B        | 0.0000       |
| 16        | vib      | 430.60          | 426.29                | A        | 0.0055       |
| 17        | vib      | 495.73          | 490.77                | A        | 0.0000       |
| 18        | vib      | 498.32          | 493.34                | B        | 9.4197       |
| 19        | vib      | 535.33          | 529.97                | B        | 0.0000       |
| 20        | vib      | 569.07          | 563.38                | A        | 206.5087     |
| 21        | vib      | 579.03          | 573.24                | A        | 0.0000       |
| 22        | vib      | 583.93          | 578.09                | B        | 36.2658      |
| 23        | vib      | 623.24          | 617.00                | A        | 1.9574       |
| 24        | vib      | 623.73          | 617.50                | B        | 0.0000       |
| 25        | vib      | 663.88          | 657.24                | A        | 28.2393      |
| 26        | vib      | 664.20          | 657.56                | B        | 0.0000       |
| 27        | vib      | 699.33          | 692.34                | B        | 7.6291       |
| 28        | vib      | 700.97          | 693.96                | A        | 0.0000       |
| 29        | vib      | 774.18          | 766.44                | B        | 0.0000       |

|    |     |           |         |   |           |
|----|-----|-----------|---------|---|-----------|
| 30 | vib | 776.31    | 768.54  | A | 0.9056    |
| 31 | vib | 908.64    | 899.56  | A | 0.0000    |
| 32 | vib | 917.54    | 908.36  | B | 7.9970    |
| 33 | vib | 925.02    | 915.77  | B | 0.0000    |
| 34 | vib | 925.03    | 915.78  | A | 30.2121   |
| 35 | vib | 1008.31   | 998.22  | A | 0.0000    |
| 36 | vib | 1008.34   | 998.25  | B | 107.1077  |
| 37 | vib | 1038.04   | 1027.66 | B | 95.1879   |
| 38 | vib | 1038.28   | 1027.90 | A | 0.0000    |
| 39 | vib | 1102.98   | 1091.95 | B | 19.2218   |
| 40 | vib | 1118.92   | 1107.73 | A | 0.0000    |
| 41 | vib | 1175.97   | 1164.21 | B | 72.2511   |
| 42 | vib | 1176.60   | 1164.84 | A | 0.0000    |
| 43 | vib | 1292.24   | 1279.32 | B | 306.4616  |
| 44 | vib | 1293.45   | 1280.51 | A | 0.0000    |
| 45 | vib | 1354.39   | 1340.85 | A | 0.0000    |
| 46 | vib | 1354.43   | 1340.89 | B | 197.5534  |
| 47 | vib | 1467.55   | 1452.87 | B | 397.3180  |
| 48 | vib | 1468.01   | 1453.33 | A | 0.0000    |
| 49 | vib | 1541.69   | 1526.28 | A | 0.0000    |
| 50 | vib | 1585.91   | 1570.05 | B | 632.7527  |
| 51 | vib | 1649.00   | 1632.51 | A | 0.0000    |
| 52 | vib | 1649.13   | 1632.64 | B | 22.6574   |
| 53 | vib | 1750.38   | 1732.88 | A | 0.0000    |
| 54 | vib | 1750.64   | 1733.14 | B | 560.7695  |
| 55 | vib | 2252.87   | 2230.34 | A | 0.0000    |
| 56 | vib | 2306.19   | 2283.13 | B | 2537.5404 |
| 57 | vib | 3191.86   | 3159.94 | B | 4.0361    |
| 58 | vib | 3191.88   | 3159.96 | A | 0.0000    |
| 59 | vib | 3621.84   | 3585.63 | B | 209.3348  |
| 60 | vib | 3622.06   | 3585.84 | A | 0.0000    |
| 61 | rot | 0.0254153 | -       |   |           |
| 62 | rot | 0.0082517 | -       |   |           |
| 63 | rot | 0.0062293 | -       |   |           |

----- ZPE & THERMAL CONTRIBUTIONS -----

|                                |            |   |              |
|--------------------------------|------------|---|--------------|
| Eelectronic                    | [kJ/mol]   | = | -3958666.426 |
| Ezpe                           | [kJ/mol]   | = | +362.752     |
| Eelectronic+Ezpe               | [kJ/mol]   | = | -3958303.674 |
|                                |            |   |              |
| Eelectronic                    | [hartrees] | = | -1507.776205 |
| Ezpe                           | [hartrees] | = | +0.138165    |
| Eelectronic+Ezpe               | [hartrees] | = | -1507.638040 |
|                                |            |   |              |
| Thermal Correction to Energy   | [kJ/mol]   | = | +402.166     |
| Thermal Correction to Enthalpy | [kJ/mol]   | = | +404.645     |
| Thermal Correction to Gibbs    | [kJ/mol]   | = | +245.731     |

----- ENERGETICS -----

|                   |              |                      |              |
|-------------------|--------------|----------------------|--------------|
| Temperature=      | 298.150000   |                      |              |
| E(ZPE)=           | 0.136784     | E(Thermal)=          | 0.151901     |
| E(SCF)=           | -1502.372794 | DE(MP2)=             | -2.912395    |
| DE(CBS)=          | -0.287627    | DE(MP34)=            | -0.063511    |
| DE(CCSO)=         | -0.103441    | DE(Int)=             | 0.094654     |
| DE(Empirical)=    | -0.127469    |                      |              |
| CBS-QB3 (0 K)=    | -1505.635799 | CBS-QB3 Energy=      | -1505.620682 |
| CBS-QB3 Enthalpy= | -1505.619738 | CBS-QB3 Free Energy= | -1505.680494 |

!+++++  
 END OF GAUSSIAN OUTPUT FILENAME: NSU3-dimer-reactant-qb3.log

!+++++  
 GAUSSIAN OUTPUT FILENAME: NSU3-dimer-reactant-v2.log

1)LEVEL OF THEORY: B3LYP/DEF2TZVP  
 Charge = 0 Multiplicity = 1 Stoichiometry C6H6N6O2S2

-----  
 ----- OPTIMIZED GEOMETRY -----  
 -----

| Center<br>Number | Atomic<br>Number | Atomic<br>Type | Coordinates (Angstroms) |           |          |
|------------------|------------------|----------------|-------------------------|-----------|----------|
|                  |                  |                | X                       | Y         | Z        |
| 1                | 7                | 0              | 0.362057                | -1.770087 | 0.000000 |
| 2                | 7                | 0              | -1.313978               | -3.377237 | 0.000000 |
| 3                | 6                | 0              | -0.902430               | -2.081136 | 0.000000 |
| 4                | 6                | 0              | 1.313978                | -2.781673 | 0.000000 |
| 5                | 6                | 0              | 0.781104                | -4.156024 | 0.000000 |
| 6                | 7                | 0              | -0.474064               | -4.431928 | 0.000000 |
| 7                | 1                | 0              | 1.472455                | -4.988655 | 0.000000 |
| 8                | 16               | 0              | -2.177625               | -0.891646 | 0.000000 |
| 9                | 1                | 0              | -1.326473               | 0.193049  | 0.000000 |
| 10               | 8                | 0              | 2.507274                | -2.543304 | 0.000000 |
| 11               | 1                | 0              | -2.293353               | -3.613360 | 0.000000 |
| 12               | 7                | 0              | -0.362057               | 1.770087  | 0.000000 |
| 13               | 7                | 0              | 1.313978                | 3.377237  | 0.000000 |
| 14               | 6                | 0              | 0.902430                | 2.081136  | 0.000000 |
| 15               | 6                | 0              | -1.313978               | 2.781673  | 0.000000 |
| 16               | 6                | 0              | -0.781104               | 4.156024  | 0.000000 |
| 17               | 7                | 0              | 0.474064                | 4.431928  | 0.000000 |
| 18               | 1                | 0              | -1.472455               | 4.988655  | 0.000000 |
| 19               | 16               | 0              | 2.177625                | 0.891646  | 0.000000 |
| 20               | 1                | 0              | 1.326473                | -0.193049 | 0.000000 |
| 21               | 8                | 0              | -2.507274               | 2.543304  | 0.000000 |
| 22               | 1                | 0              | 2.293353                | 3.613360  | 0.000000 |

-----  
 Rotational constants (GHZ):                    0.7704707                    0.2531149                    0.1905240

-----  
 ----- FREQUENCIES AND ROTATIONAL CONSTANTS -----  
 -----

| INDEX NO. | DOF TYPE | CM-1 (UNSCALED) | CM-1 (SCALED BY ) | SYMMETRY | IR-INTENSITY |
|-----------|----------|-----------------|-------------------|----------|--------------|
| 1         | vib      | 23.31           | 0.00              | AU       | 0.4876       |
| 2         | vib      | 32.42           | 0.00              | AU       | 8.0019       |
| 3         | vib      | 57.79           | 0.00              | BG       | 0.0000       |
| 4         | vib      | 79.38           | 0.00              | AG       | 0.0000       |
| 5         | vib      | 81.93           | 0.00              | BU       | 26.5209      |
| 6         | vib      | 101.27          | 0.00              | AG       | 0.0000       |
| 7         | vib      | 114.43          | 0.00              | BG       | 0.0000       |
| 8         | vib      | 117.99          | 0.00              | AU       | 0.5569       |
| 9         | vib      | 160.74          | 0.00              | AU       | 0.2945       |
| 10        | vib      | 169.99          | 0.00              | BG       | 0.0000       |
| 11        | vib      | 269.21          | 0.00              | AG       | 0.0000       |
| 12        | vib      | 289.12          | 0.00              | BU       | 8.4382       |
| 13        | vib      | 422.39          | 0.00              | AG       | 0.0000       |
| 14        | vib      | 427.01          | 0.00              | BU       | 7.2054       |
| 15        | vib      | 429.17          | 0.00              | AU       | 0.2161       |
| 16        | vib      | 430.03          | 0.00              | BG       | 0.0000       |
| 17        | vib      | 500.68          | 0.00              | AG       | 0.0000       |
| 18        | vib      | 503.77          | 0.00              | BU       | 9.6297       |
| 19        | vib      | 548.86          | 0.00              | BG       | 0.0000       |
| 20        | vib      | 575.87          | 0.00              | AU       | 186.3447     |
| 21        | vib      | 582.77          | 0.00              | AG       | 0.0000       |
| 22        | vib      | 587.63          | 0.00              | BU       | 37.1373      |
| 23        | vib      | 639.30          | 0.00              | BG       | 0.0000       |
| 24        | vib      | 641.89          | 0.00              | AU       | 1.3019       |
| 25        | vib      | 672.20          | 0.00              | AU       | 14.8583      |
| 26        | vib      | 672.54          | 0.00              | BG       | 0.0000       |
| 27        | vib      | 702.88          | 0.00              | BU       | 7.4803       |
| 28        | vib      | 705.12          | 0.00              | AG       | 0.0000       |
| 29        | vib      | 781.76          | 0.00              | BG       | 0.0000       |
| 30        | vib      | 783.43          | 0.00              | AU       | 0.0552       |
| 31        | vib      | 921.04          | 0.00              | AG       | 0.0000       |
| 32        | vib      | 930.48          | 0.00              | BU       | 9.5765       |
| 33        | vib      | 932.56          | 0.00              | AU       | 28.6715      |

|    |     |           |      |    |           |
|----|-----|-----------|------|----|-----------|
| 34 | vib | 932.61    | 0.00 | BG | 0.0000    |
| 35 | vib | 1024.12   | 0.00 | AG | 0.0000    |
| 36 | vib | 1026.28   | 0.00 | BU | 79.6837   |
| 37 | vib | 1045.99   | 0.00 | BU | 122.7786  |
| 38 | vib | 1046.12   | 0.00 | AG | 0.0000    |
| 39 | vib | 1110.23   | 0.00 | BU | 30.3189   |
| 40 | vib | 1128.38   | 0.00 | AG | 0.0000    |
| 41 | vib | 1189.99   | 0.00 | BU | 73.0037   |
| 42 | vib | 1191.20   | 0.00 | AG | 0.0000    |
| 43 | vib | 1300.82   | 0.00 | BU | 291.2843  |
| 44 | vib | 1302.24   | 0.00 | AG | 0.0000    |
| 45 | vib | 1362.08   | 0.00 | AG | 0.0000    |
| 46 | vib | 1362.36   | 0.00 | BU | 187.7720  |
| 47 | vib | 1463.88   | 0.00 | AG | 0.0000    |
| 48 | vib | 1464.61   | 0.00 | BU | 423.1387  |
| 49 | vib | 1535.21   | 0.00 | AG | 0.0000    |
| 50 | vib | 1583.34   | 0.00 | BU | 640.2495  |
| 51 | vib | 1649.68   | 0.00 | AG | 0.0000    |
| 52 | vib | 1649.76   | 0.00 | BU | 19.7135   |
| 53 | vib | 1735.61   | 0.00 | BU | 556.3851  |
| 54 | vib | 1735.78   | 0.00 | AG | 0.0000    |
| 55 | vib | 2175.34   | 0.00 | AG | 0.0000    |
| 56 | vib | 2243.93   | 0.00 | BU | 3093.8182 |
| 57 | vib | 3197.82   | 0.00 | BU | 2.6832    |
| 58 | vib | 3197.84   | 0.00 | AG | 0.0000    |
| 59 | vib | 3611.86   | 0.00 | BU | 207.9579  |
| 60 | vib | 3612.09   | 0.00 | AG | 0.0000    |
| 61 | rot | 0.0257001 | -    |    |           |
| 62 | rot | 0.0084430 | -    |    |           |
| 63 | rot | 0.0063552 | -    |    |           |

----- ZPE & THERMAL CONTRIBUTIONS -----

Eelectronic [kJ/mol] = -3959072.208  
 Ezpe [kJ/mol] = +363.474  
 Eelectronic+Ezpe [kJ/mol] = -3958708.734

Eelectronic [hartrees] = -1507.930759  
 Ezpe [hartrees] = +0.138440  
 Eelectronic+Ezpe [hartrees] = -1507.792319

Thermal Correction to Energy [kJ/mol] = +402.586  
 Thermal Correction to Enthalpy [kJ/mol] = +405.065  
 Thermal Correction to Gibbs [kJ/mol] = +246.458

!+++++  
 END OF GAUSSIAN OUTPUT FILENAME: NSU3-dimer-reactant-v2.log  
 !+++++

!+++++  
 GAUSSIAN OUTPUT FILENAME: NSU3-NSU1-H2O-TS-d3bj.log  
 !+++++

1) LEVEL OF THEORY: B3LYP/DEF2TZVP  
 Charge = 0 Multiplicity = 1 Stoichiometry C3H5N3O2S

----- OPTIMIZED GEOMETRY -----

| Center Number | Atomic Number | Atomic Type | Coordinates (Angstroms) |           |           |
|---------------|---------------|-------------|-------------------------|-----------|-----------|
|               |               |             | X                       | Y         | Z         |
| 1             | 6             | 0           | -2.292754               | -0.345620 | -0.005600 |
| 2             | 6             | 0           | -1.462188               | 0.874415  | -0.003064 |
| 3             | 7             | 0           | -0.093101               | 0.647626  | -0.012823 |
| 4             | 6             | 0           | 0.385914                | -0.584033 | 0.000729  |
| 5             | 16            | 0           | 2.080341                | -0.927764 | 0.002124  |
| 6             | 7             | 0           | -0.467773               | -1.639840 | 0.013205  |

|    |   |   |           |           |           |
|----|---|---|-----------|-----------|-----------|
| 7  | 7 | 0 | -1.812870 | -1.536809 | 0.004177  |
| 8  | 1 | 0 | -3.369852 | -0.242445 | -0.012782 |
| 9  | 1 | 0 | 1.058078  | 1.653084  | -0.055023 |
| 10 | 8 | 0 | 2.097132  | 1.887387  | -0.092520 |
| 11 | 1 | 0 | 2.343850  | 2.338015  | 0.726382  |
| 12 | 1 | 0 | 2.369046  | 0.685535  | -0.031514 |
| 13 | 8 | 0 | -1.940855 | 1.990678  | 0.009461  |
| 14 | 1 | 0 | -0.106421 | -2.579897 | 0.019126  |

-----  
Rotational constants (GHZ):                    1.9834694                    1.1654198                    0.7355062  
-----

-----  
----- FREQUENCIES AND ROTATIONAL CONSTANTS -----  
-----

| INDEX NO. | DOF TYPE | CM-1(UNSCALED) | CM-1(SCALED BY ) | SYMMETRY | IR-INTENSITY |
|-----------|----------|----------------|------------------|----------|--------------|
| 1         | vib      | -969.84        | 0.00             | A        | 1217.0229    |
| 2         | vib      | 76.39          | 0.00             | A        | 8.1570       |
| 3         | vib      | 134.78         | 0.00             | A        | 0.3643       |
| 4         | vib      | 158.11         | 0.00             | A        | 1.5101       |
| 5         | vib      | 226.65         | 0.00             | A        | 36.0192      |
| 6         | vib      | 375.86         | 0.00             | A        | 87.2371      |
| 7         | vib      | 432.73         | 0.00             | A        | 7.3904       |
| 8         | vib      | 434.64         | 0.00             | A        | 7.9701       |
| 9         | vib      | 457.49         | 0.00             | A        | 1.1608       |
| 10        | vib      | 475.34         | 0.00             | A        | 114.1813     |
| 11        | vib      | 549.11         | 0.00             | A        | 64.5589      |
| 12        | vib      | 557.91         | 0.00             | A        | 53.4563      |
| 13        | vib      | 590.68         | 0.00             | A        | 21.8020      |
| 14        | vib      | 621.03         | 0.00             | A        | 82.6462      |
| 15        | vib      | 675.18         | 0.00             | A        | 10.6300      |
| 16        | vib      | 711.83         | 0.00             | A        | 11.3857      |
| 17        | vib      | 779.82         | 0.00             | A        | 1.1054       |
| 18        | vib      | 929.60         | 0.00             | A        | 15.5803      |
| 19        | vib      | 946.95         | 0.00             | A        | 94.3287      |
| 20        | vib      | 1053.05        | 0.00             | A        | 18.1015      |
| 21        | vib      | 1076.56        | 0.00             | A        | 247.0170     |
| 22        | vib      | 1093.55        | 0.00             | A        | 97.2059      |
| 23        | vib      | 1195.76        | 0.00             | A        | 63.0287      |
| 24        | vib      | 1224.18        | 0.00             | A        | 390.6136     |
| 25        | vib      | 1310.37        | 0.00             | A        | 170.1880     |
| 26        | vib      | 1363.30        | 0.00             | A        | 135.3599     |
| 27        | vib      | 1430.02        | 0.00             | A        | 389.8095     |
| 28        | vib      | 1524.23        | 0.00             | A        | 160.2949     |
| 29        | vib      | 1567.76        | 0.00             | A        | 348.9461     |
| 30        | vib      | 1628.69        | 0.00             | A        | 349.0989     |
| 31        | vib      | 1649.90        | 0.00             | A        | 0.4906       |
| 32        | vib      | 1758.57        | 0.00             | A        | 505.7405     |
| 33        | vib      | 2269.49        | 0.00             | A        | 1777.1775    |
| 34        | vib      | 3200.28        | 0.00             | A        | 0.7798       |
| 35        | vib      | 3618.87        | 0.00             | A        | 100.2714     |
| 36        | vib      | 3788.05        | 0.00             | A        | 86.5329      |
| 37        | rot      | 0.0661614      | -                |          |              |
| 38        | rot      | 0.0388742      | -                |          |              |
| 39        | rot      | 0.0245338      | -                |          |              |

-----  
----- ZPE & THERMAL CONTRIBUTIONS -----  
-----

|                                |            |                |
|--------------------------------|------------|----------------|
| Eelectronic                    | [kJ/mol]   | = -2180282.988 |
| Ezpe                           | [kJ/mol]   | = +238.577     |
| Eelectronic+Ezpe               | [kJ/mol]   | = -2180044.411 |
| Eelectronic                    | [hartrees] | = -830.425819  |
| Ezpe                           | [hartrees] | = +0.090869    |
| Eelectronic+Ezpe               | [hartrees] | = -830.334950  |
| Thermal Correction to Energy   | [kJ/mol]   | = +259.783     |
| Thermal Correction to Enthalpy | [kJ/mol]   | = +262.261     |
| Thermal Correction to Gibbs    | [kJ/mol]   | = +150.601     |



!+++++  
 END OF GAUSSIAN OUTPUT FILENAME: NSU3-NSU1-H2O-TS-d3bj.log  
 !+++++

!+++++  
 GAUSSIAN OUTPUT FILENAME: NSU3-NSU1-m062x-product.log  
 !+++++

1)LEVEL OF THEORY: M062X/DEF2TZVP  
 Charge = 0 Multiplicity = 1 Stoichiometry C3H3N3OS

-----  
 ----- OPTIMIZED GEOMETRY -----  
 -----

| Center<br>Number | Atomic<br>Number | Atomic<br>Type | Coordinates (Angstroms) |           |           |
|------------------|------------------|----------------|-------------------------|-----------|-----------|
|                  |                  |                | X                       | Y         | Z         |
| 1                | 7                | 0              | -0.896150               | -0.173280 | 0.000000  |
| 2                | 7                | 0              | 1.298217                | 0.438817  | -0.000000 |
| 3                | 6                | 0              | 0.000000                | 0.860295  | 0.000000  |
| 4                | 6                | 0              | -0.580639               | -1.525823 | 0.000000  |
| 5                | 6                | 0              | 0.872963                | -1.766757 | -0.000000 |
| 6                | 7                | 0              | 1.738023                | -0.826367 | -0.000000 |
| 7                | 1                | 0              | 1.225580                | -2.788410 | -0.000000 |
| 8                | 16               | 0              | -0.419805               | 2.447262  | 0.000000  |
| 9                | 1                | 0              | -1.877194               | 0.076817  | 0.000000  |
| 10               | 8                | 0              | -1.422213               | -2.384549 | 0.000000  |
| 11               | 1                | 0              | 2.011615                | 1.151312  | -0.000000 |

Rotational constants (GHZ):                    3.6773322                    1.3349671                    0.9794143

-----  
 ----- FREQUENCIES AND ROTATIONAL CONSTANTS -----  
 -----

| INDEX NO. | DOF TYPE | CM-1 (UNSCALED) | CM-1 (SCALED BY ) | SYMMETRY | IR-INTENSITY |
|-----------|----------|-----------------|-------------------|----------|--------------|
| 1         | vib      | 133.58          | 0.00              | A''      | 2.0403       |
| 2         | vib      | 157.32          | 0.00              | A''      | 2.1971       |
| 3         | vib      | 274.61          | 0.00              | A'       | 10.0471      |
| 4         | vib      | 427.77          | 0.00              | A''      | 0.0900       |
| 5         | vib      | 463.97          | 0.00              | A'       | 8.3378       |
| 6         | vib      | 488.19          | 0.00              | A'       | 19.1347      |
| 7         | vib      | 553.67          | 0.00              | A'       | 22.8511      |
| 8         | vib      | 653.66          | 0.00              | A''      | 6.5300       |
| 9         | vib      | 671.01          | 0.00              | A''      | 27.9991      |
| 10        | vib      | 705.32          | 0.00              | A'       | 11.6462      |
| 11        | vib      | 735.64          | 0.00              | A''      | 102.0172     |
| 12        | vib      | 782.31          | 0.00              | A''      | 22.4422      |
| 13        | vib      | 920.43          | 0.00              | A''      | 17.3069      |
| 14        | vib      | 950.98          | 0.00              | A'       | 7.6515       |
| 15        | vib      | 1042.99         | 0.00              | A'       | 22.5244      |
| 16        | vib      | 1114.48         | 0.00              | A'       | 26.7624      |
| 17        | vib      | 1201.25         | 0.00              | A'       | 267.6497     |
| 18        | vib      | 1274.75         | 0.00              | A'       | 44.3711      |
| 19        | vib      | 1361.71         | 0.00              | A'       | 45.9187      |
| 20        | vib      | 1417.42         | 0.00              | A'       | 51.5196      |
| 21        | vib      | 1439.76         | 0.00              | A'       | 120.6659     |
| 22        | vib      | 1566.61         | 0.00              | A'       | 663.9610     |
| 23        | vib      | 1693.92         | 0.00              | A'       | 10.8840      |
| 24        | vib      | 1850.05         | 0.00              | A'       | 583.5974     |
| 25        | vib      | 3246.89         | 0.00              | A'       | 2.2202       |
| 26        | vib      | 3594.33         | 0.00              | A'       | 80.4090      |
| 27        | vib      | 3644.98         | 0.00              | A'       | 116.9276     |
| 28        | rot      | 0.1226626       | -                 |          |              |
| 29        | rot      | 0.0445297       | -                 |          |              |
| 30        | rot      | 0.0326697       | -                 |          |              |

-----  
 ----- ZPE & THERMAL CONTRIBUTIONS -----  
 -----

Eelectronic                                    [kJ/mol]    = -1979058.296

```

Ezpe [kJ/mol] = +193.602
Eelectronic+Ezpe [kJ/mol] = -1978864.694

Eelectronic [hartrees] = -753.783392
Ezpe [hartrees] = +0.073739
Eelectronic+Ezpe [hartrees] = -753.709653

Thermal Correction to Energy [kJ/mol] = +210.148
Thermal Correction to Enthalpy [kJ/mol] = +212.626
Thermal Correction to Gibbs [kJ/mol] = +111.613

```

```

!+++++
END OF GAUSSIAN OUTPUT FILENAME: NSU3-NSU1-m062x-product.log
!+++++

```

```

!+++++
GAUSSIAN OUTPUT FILENAME: NSU3-NSU1-m062x-reactant.log
!+++++

```

```

1) LEVEL OF THEORY: M062X/DEF2TZVP
Charge = 0 Multiplicity = 1 Stoichiometry C3H3N3OS

```

```

-----
----- OPTIMIZED GEOMETRY -----
-----

```

| Center Number | Atomic Number | Atomic Type | Coordinates (Angstroms) |           |           |
|---------------|---------------|-------------|-------------------------|-----------|-----------|
|               |               |             | X                       | Y         | Z         |
| 1             | 7             | 0           | -0.976664               | -0.131198 | 0.000000  |
| 2             | 7             | 0           | 1.306661                | 0.345939  | -0.000000 |
| 3             | 6             | 0           | -0.000000               | 0.703387  | 0.000000  |
| 4             | 6             | 0           | -0.666425               | -1.491953 | -0.000000 |
| 5             | 6             | 0           | 0.779973                | -1.816914 | -0.000000 |
| 6             | 7             | 0           | 1.710063                | -0.939219 | -0.000000 |
| 7             | 1             | 0           | 1.078394                | -2.857387 | -0.000000 |
| 8             | 16            | 0           | -0.277664               | 2.443696  | 0.000000  |
| 9             | 1             | 0           | -1.605661               | 2.287443  | 0.000000  |
| 10            | 8             | 0           | -1.505139               | -2.356403 | -0.000000 |
| 11            | 1             | 0           | 2.049295                | 1.026262  | -0.000000 |

```

Rotational constants (GHZ): 3.6877298 1.3253394 0.9749504

```

```

-----
----- FREQUENCIES AND ROTATIONAL CONSTANTS -----
-----

```

| INDEX NO. | DOF | TYPE | CM-1 (UNSCALED) | CM-1 (SCALED BY ) | SYMMETRY | IR-INTENSITY |
|-----------|-----|------|-----------------|-------------------|----------|--------------|
| 1         | vib |      | 101.54          | 0.00              | A''      | 0.0508       |
| 2         | vib |      | 169.14          | 0.00              | A''      | 0.0229       |
| 3         | vib |      | 254.27          | 0.00              | A'       | 5.4036       |
| 4         | vib |      | 316.92          | 0.00              | A''      | 39.5449      |
| 5         | vib |      | 419.14          | 0.00              | A'       | 3.5584       |
| 6         | vib |      | 434.97          | 0.00              | A''      | 1.2322       |
| 7         | vib |      | 495.21          | 0.00              | A'       | 3.5475       |
| 8         | vib |      | 565.78          | 0.00              | A''      | 78.0079      |
| 9         | vib |      | 578.89          | 0.00              | A'       | 12.5227      |
| 10        | vib |      | 675.80          | 0.00              | A''      | 8.4172       |
| 11        | vib |      | 704.24          | 0.00              | A'       | 9.4272       |
| 12        | vib |      | 792.43          | 0.00              | A''      | 0.1764       |
| 13        | vib |      | 900.91          | 0.00              | A'       | 20.4278      |
| 14        | vib |      | 938.54          | 0.00              | A'       | 13.1255      |
| 15        | vib |      | 952.02          | 0.00              | A''      | 14.7315      |
| 16        | vib |      | 1044.47         | 0.00              | A'       | 40.0870      |
| 17        | vib |      | 1119.26         | 0.00              | A'       | 2.2066       |
| 18        | vib |      | 1197.25         | 0.00              | A'       | 32.3306      |
| 19        | vib |      | 1310.12         | 0.00              | A'       | 127.4014     |
| 20        | vib |      | 1377.07         | 0.00              | A'       | 90.0961      |
| 21        | vib |      | 1512.69         | 0.00              | A'       | 192.4098     |
| 22        | vib |      | 1620.56         | 0.00              | A'       | 517.2372     |
| 23        | vib |      | 1703.40         | 0.00              | A'       | 20.3751      |
| 24        | vib |      | 1827.00         | 0.00              | A'       | 443.8853     |

|    |     |           |      |    |          |
|----|-----|-----------|------|----|----------|
| 25 | vib | 2751.67   | 0.00 | A' | 17.9463  |
| 26 | vib | 3230.66   | 0.00 | A' | 0.2377   |
| 27 | vib | 3644.90   | 0.00 | A' | 123.9765 |
| 28 | rot | 0.1230094 | -    |    |          |
| 29 | rot | 0.0442086 | -    |    |          |
| 30 | rot | 0.0325208 | -    |    |          |

----- ZPE & THERMAL CONTRIBUTIONS -----

|                  |          |                |
|------------------|----------|----------------|
| Eelectronic      | [kJ/mol] | = -1978988.912 |
| Ezpe             | [kJ/mol] | = +183.260     |
| Eelectronic+Ezpe | [kJ/mol] | = -1978805.652 |

|                  |            |               |
|------------------|------------|---------------|
| Eelectronic      | [hartrees] | = -753.756965 |
| Ezpe             | [hartrees] | = +0.069800   |
| Eelectronic+Ezpe | [hartrees] | = -753.687165 |

|                                |          |            |
|--------------------------------|----------|------------|
| Thermal Correction to Energy   | [kJ/mol] | = +201.016 |
| Thermal Correction to Enthalpy | [kJ/mol] | = +203.495 |
| Thermal Correction to Gibbs    | [kJ/mol] | = +100.137 |

!+++++  
 END OF GAUSSIAN OUTPUT FILENAME: NSU3-NSU1-m062x-reactant.log  
 !+++++

!+++++  
 GAUSSIAN OUTPUT FILENAME: NSU3-qb3.log  
 !+++++

1) LEVEL OF THEORY: CBS-QB3  
 Charge = 0 Multiplicity = 1 Stoichiometry C3H3N3OS

----- OPTIMIZED GEOMETRY -----

| Center Number | Atomic Number | Atomic Type | Coordinates (Angstroms) |           |           |
|---------------|---------------|-------------|-------------------------|-----------|-----------|
|               |               |             | X                       | Y         | Z         |
| 1             | 7             | 0           | 0.157265                | -0.972148 | -0.000003 |
| 2             | 7             | 0           | -0.375807               | 1.308953  | 0.000064  |
| 3             | 6             | 0           | -0.704295               | -0.014915 | -0.000004 |
| 4             | 6             | 0           | 1.521488                | -0.632765 | 0.000139  |
| 5             | 6             | 0           | 1.808710                | 0.823169  | 0.000068  |
| 6             | 7             | 0           | 0.908959                | 1.745150  | 0.000083  |
| 7             | 1             | 0           | 2.843192                | 1.147689  | 0.000033  |
| 8             | 16            | 0           | -2.458516               | -0.341301 | -0.000085 |
| 9             | 1             | 0           | -2.269209               | -1.670343 | -0.000143 |
| 10            | 8             | 0           | 2.405388                | -1.460589 | -0.000104 |
| 11            | 1             | 0           | -1.069181               | 2.041562  | 0.000073  |

Rotational constants (GHZ):                    3.6387674                    1.3050257                    0.9605347

----- FREQUENCIES AND ROTATIONAL CONSTANTS -----

| INDEX NO. | DOF TYPE | CM-1 (UNSCALED) | CM-1 (SCALED BY 0.99) | SYMMETRY | IR-INTENSITY |
|-----------|----------|-----------------|-----------------------|----------|--------------|
| 1         | vib      | 91.91           | 90.99                 | A        | 0.0344       |
| 2         | vib      | 160.55          | 158.95                | A        | 0.5822       |
| 3         | vib      | 226.78          | 224.51                | A        | 38.4711      |
| 4         | vib      | 245.49          | 243.03                | A        | 4.7100       |
| 5         | vib      | 398.24          | 394.26                | A        | 7.0361       |
| 6         | vib      | 424.67          | 420.42                | A        | 0.0926       |
| 7         | vib      | 487.47          | 482.60                | A        | 3.4820       |
| 8         | vib      | 550.60          | 545.09                | A        | 83.3638      |
| 9         | vib      | 572.08          | 566.36                | A        | 11.1931      |
| 10        | vib      | 658.05          | 651.47                | A        | 13.2997      |
| 11        | vib      | 693.04          | 686.11                | A        | 8.9299       |
| 12        | vib      | 774.63          | 766.88                | A        | 0.4074       |

|    |     |           |         |   |          |
|----|-----|-----------|---------|---|----------|
| 13 | vib | 876.58    | 867.81  | A | 17.9007  |
| 14 | vib | 911.80    | 902.69  | A | 13.4349  |
| 15 | vib | 931.28    | 921.96  | A | 14.9581  |
| 16 | vib | 1020.11   | 1009.91 | A | 37.9160  |
| 17 | vib | 1090.67   | 1079.77 | A | 0.9815   |
| 18 | vib | 1155.07   | 1143.52 | A | 43.1491  |
| 19 | vib | 1278.82   | 1266.03 | A | 190.8604 |
| 20 | vib | 1346.04   | 1332.58 | A | 65.5143  |
| 21 | vib | 1479.87   | 1465.08 | A | 131.1524 |
| 22 | vib | 1591.10   | 1575.19 | A | 454.2214 |
| 23 | vib | 1650.89   | 1634.38 | A | 17.3195  |
| 24 | vib | 1776.16   | 1758.40 | A | 352.3679 |
| 25 | vib | 2690.10   | 2663.20 | A | 11.9233  |
| 26 | vib | 3188.14   | 3156.25 | A | 2.5954   |
| 27 | vib | 3626.02   | 3589.76 | A | 97.7758  |
| 28 | rot | 0.1213762 | -       |   |          |
| 29 | rot | 0.0435310 | -       |   |          |
| 30 | rot | 0.0320400 | -       |   |          |

----- ZPE & THERMAL CONTRIBUTIONS -----

|                                |            |                |
|--------------------------------|------------|----------------|
| Eelectronic                    | [kJ/mol]   | = -1979299.143 |
| Ezpe                           | [kJ/mol]   | = +178.820     |
| Eelectronic+Ezpe               | [kJ/mol]   | = -1979120.323 |
| Eelectronic                    | [hartrees] | = -753.875126  |
| Ezpe                           | [hartrees] | = +0.068109    |
| Eelectronic+Ezpe               | [hartrees] | = -753.807017  |
| Thermal Correction to Energy   | [kJ/mol]   | = +197.254     |
| Thermal Correction to Enthalpy | [kJ/mol]   | = +199.735     |
| Thermal Correction to Gibbs    | [kJ/mol]   | = +94.788      |

----- ENERGETICS -----

|                   |             |                      |             |
|-------------------|-------------|----------------------|-------------|
| Temperature=      | 298.150000  |                      |             |
| E(ZPE)=           | 0.067427    | E(Thermal)=          | 0.074499    |
| E(SCF)=           | -751.181027 | DE(MP2)=             | -1.447117   |
| DE(CBS)=          | -0.143522   | DE(MP34)=            | -0.033744   |
| DE(CCSB)=         | -0.050698   | DE(Int)=             | 0.047314    |
| DE(Empirical)=    | -0.063827   |                      |             |
| CBS-QB3 (0 K)=    | -752.805192 | CBS-QB3 Energy=      | -752.798121 |
| CBS-QB3 Enthalpy= | -752.797177 | CBS-QB3 Free Energy= | -752.837240 |

!+++++  
 END OF GAUSSIAN OUTPUT FILENAME: NSU3-qb3.log  
 !+++++

!+++++  
 GAUSSIAN OUTPUT FILENAME: SU1-m062x.log  
 !+++++

1) LEVEL OF THEORY: OPT=VTIGHT  
 Charge = 0 Multiplicity = 1 Stoichiometry C4H4N2OS

----- OPTIMIZED GEOMETRY -----

| Center Number | Atomic Number | Atomic Type | Coordinates (Angstroms) |           |           |
|---------------|---------------|-------------|-------------------------|-----------|-----------|
|               |               |             | X                       | Y         | Z         |
| 1             | 7             | 0           | -0.873491               | -0.173500 | 0.000000  |
| 2             | 7             | 0           | 1.312103                | 0.483012  | -0.000000 |
| 3             | 6             | 0           | -0.000000               | 0.870968  | -0.000000 |
| 4             | 6             | 0           | -0.580181               | -1.547994 | 0.000000  |
| 5             | 6             | 0           | 0.846311                | -1.838717 | -0.000000 |
| 6             | 6             | 0           | 1.720451                | -0.824126 | -0.000000 |

|    |    |   |           |           |           |
|----|----|---|-----------|-----------|-----------|
| 7  | 1  | 0 | 1.159168  | -2.869739 | -0.000000 |
| 8  | 1  | 0 | 2.791538  | -0.971892 | -0.000000 |
| 9  | 16 | 0 | -0.454745 | 2.454061  | 0.000000  |
| 10 | 1  | 0 | -1.856064 | 0.067902  | 0.000000  |
| 11 | 8  | 0 | -1.473739 | -2.356892 | 0.000000  |
| 12 | 1  | 0 | 1.981423  | 1.236518  | -0.000000 |

-----  
Rotational constants (GHZ):                    3.5897210                    1.3214615                    0.9658933

-----  
----- FREQUENCIES AND ROTATIONAL CONSTANTS -----  
-----

| INDEX NO. | DOF TYPE | CM-1 (UNSCALED) | CM-1 (SCALED BY ) | SYMMETRY | IR-INTENSITY |
|-----------|----------|-----------------|-------------------|----------|--------------|
| 1         | vib      | 135.77          | 0.00              | A''      | 0.8116       |
| 2         | vib      | 164.67          | 0.00              | A''      | 1.0561       |
| 3         | vib      | 277.91          | 0.00              | A'       | 9.6477       |
| 4         | vib      | 406.22          | 0.00              | A''      | 13.3794      |
| 5         | vib      | 460.52          | 0.00              | A'       | 15.0484      |
| 6         | vib      | 503.82          | 0.00              | A'       | 11.0803      |
| 7         | vib      | 541.77          | 0.00              | A'       | 8.9546       |
| 8         | vib      | 635.56          | 0.00              | A''      | 29.7378      |
| 9         | vib      | 668.87          | 0.00              | A''      | 17.4448      |
| 10        | vib      | 727.30          | 0.00              | A''      | 57.4183      |
| 11        | vib      | 728.93          | 0.00              | A'       | 5.9704       |
| 12        | vib      | 763.98          | 0.00              | A''      | 11.0353      |
| 13        | vib      | 838.25          | 0.00              | A''      | 70.1044      |
| 14        | vib      | 931.38          | 0.00              | A'       | 5.8729       |
| 15        | vib      | 998.95          | 0.00              | A''      | 0.0641       |
| 16        | vib      | 1013.15         | 0.00              | A'       | 11.0356      |
| 17        | vib      | 1094.65         | 0.00              | A'       | 4.4143       |
| 18        | vib      | 1182.77         | 0.00              | A'       | 222.3090     |
| 19        | vib      | 1225.31         | 0.00              | A'       | 123.5327     |
| 20        | vib      | 1247.88         | 0.00              | A'       | 56.2580      |
| 21        | vib      | 1400.64         | 0.00              | A'       | 13.2906      |
| 22        | vib      | 1420.99         | 0.00              | A'       | 58.3087      |
| 23        | vib      | 1474.30         | 0.00              | A'       | 50.7452      |
| 24        | vib      | 1587.37         | 0.00              | A'       | 819.3915     |
| 25        | vib      | 1706.30         | 0.00              | A'       | 87.8235      |
| 26        | vib      | 1833.20         | 0.00              | A'       | 678.0644     |
| 27        | vib      | 3240.33         | 0.00              | A'       | 2.2186       |
| 28        | vib      | 3281.99         | 0.00              | A'       | 5.4770       |
| 29        | vib      | 3599.44         | 0.00              | A'       | 77.4520      |
| 30        | vib      | 3642.44         | 0.00              | A'       | 109.6420     |
| 31        | rot      | 0.1197402       | -                 |          |              |
| 32        | rot      | 0.0440792       | -                 |          |              |
| 33        | rot      | 0.0322187       | -                 |          |              |

-----  
----- ZPE & THERMAL CONTRIBUTIONS -----  
-----

|                                |            |                |
|--------------------------------|------------|----------------|
| Eelectronic                    | [kJ/mol]   | = -1937017.84  |
| Ezpe                           | [kJ/mol]   | = +225.704     |
| Eelectronic+Ezpe               | [kJ/mol]   | = -1936792.136 |
|                                |            |                |
| Eelectronic                    | [hartrees] | = -737.771030  |
| Ezpe                           | [hartrees] | = +0.085966    |
| Eelectronic+Ezpe               | [hartrees] | = -737.685064  |
|                                |            |                |
| Thermal Correction to Energy   | [kJ/mol]   | = +242.478     |
| Thermal Correction to Enthalpy | [kJ/mol]   | = +244.959     |
| Thermal Correction to Gibbs    | [kJ/mol]   | = +143.707     |

!+++++  
END OF GAUSSIAN OUTPUT FILENAME: SU1-m062x.log  
!+++++

!+++++  
GAUSSIAN OUTPUT FILENAME: SU2-m062x.log  
!+++++

1)LEVEL OF THEORY: OPT=VTIGHT  
 Charge = 0 Multiplicity = 1 Stoichiometry C4H4N2OS

-----  
 ----- OPTIMIZED GEOMETRY -----  
 -----

| Center Number | Atomic Number | Atomic Type | Coordinates (Angstroms) |           |           |
|---------------|---------------|-------------|-------------------------|-----------|-----------|
|               |               |             | X                       | Y         | Z         |
| 1             | 7             | 0           | -0.801184               | -0.322729 | 0.000000  |
| 2             | 7             | 0           | 1.289183                | 0.711934  | -0.000000 |
| 3             | 6             | 0           | 0.000000                | 0.769852  | -0.000000 |
| 4             | 6             | 0           | -0.321900               | -1.648805 | 0.000000  |
| 5             | 6             | 0           | 1.122371                | -1.697839 | 0.000000  |
| 6             | 6             | 0           | 1.831809                | -0.547797 | 0.000000  |
| 7             | 1             | 0           | 1.593869                | -2.668548 | 0.000000  |
| 8             | 1             | 0           | 2.914988                | -0.570848 | -0.000000 |
| 9             | 16            | 0           | -0.836955               | 2.315771  | -0.000000 |
| 10            | 1             | 0           | 0.305873                | 3.009314  | -0.000000 |
| 11            | 8             | 0           | -1.103042               | -2.571204 | 0.000000  |
| 12            | 1             | 0           | -1.808777               | -0.229530 | 0.000000  |

Rotational constants (GHZ):                    3.5951095                    1.3127084                    0.9615945

-----  
 ----- FREQUENCIES AND ROTATIONAL CONSTANTS -----  
 -----

| INDEX NO. | DOF TYPE | CM-1 (UNSCALED) | CM-1 (SCALED BY ) | SYMMETRY | IR-INTENSITY |
|-----------|----------|-----------------|-------------------|----------|--------------|
| 1         | vib      | 152.40          | 0.00              | A''      | 2.2036       |
| 2         | vib      | 183.14          | 0.00              | A''      | 3.0427       |
| 3         | vib      | 248.46          | 0.00              | A'       | 0.4585       |
| 4         | vib      | 264.29          | 0.00              | A''      | 35.7624      |
| 5         | vib      | 413.88          | 0.00              | A''      | 7.8800       |
| 6         | vib      | 435.23          | 0.00              | A'       | 2.2745       |
| 7         | vib      | 493.68          | 0.00              | A'       | 10.0637      |
| 8         | vib      | 543.39          | 0.00              | A'       | 1.4239       |
| 9         | vib      | 635.91          | 0.00              | A''      | 31.4756      |
| 10        | vib      | 723.79          | 0.00              | A'       | 12.0891      |
| 11        | vib      | 724.31          | 0.00              | A''      | 18.9109      |
| 12        | vib      | 779.64          | 0.00              | A''      | 6.4891       |
| 13        | vib      | 859.86          | 0.00              | A''      | 46.7033      |
| 14        | vib      | 886.93          | 0.00              | A'       | 0.5211       |
| 15        | vib      | 954.78          | 0.00              | A'       | 31.2181      |
| 16        | vib      | 1011.89         | 0.00              | A'       | 40.3048      |
| 17        | vib      | 1033.05         | 0.00              | A''      | 0.2023       |
| 18        | vib      | 1090.22         | 0.00              | A'       | 17.3350      |
| 19        | vib      | 1192.77         | 0.00              | A'       | 30.2958      |
| 20        | vib      | 1229.27         | 0.00              | A'       | 5.6108       |
| 21        | vib      | 1303.71         | 0.00              | A'       | 96.3874      |
| 22        | vib      | 1443.49         | 0.00              | A'       | 16.3789      |
| 23        | vib      | 1486.89         | 0.00              | A'       | 21.5421      |
| 24        | vib      | 1589.07         | 0.00              | A'       | 583.6128     |
| 25        | vib      | 1668.46         | 0.00              | A'       | 66.2645      |
| 26        | vib      | 1824.64         | 0.00              | A'       | 736.2746     |
| 27        | vib      | 2753.31         | 0.00              | A'       | 13.5700      |
| 28        | vib      | 3210.46         | 0.00              | A'       | 12.6100      |
| 29        | vib      | 3261.94         | 0.00              | A'       | 0.2556       |
| 30        | vib      | 3591.21         | 0.00              | A'       | 66.5160      |
| 31        | rot      | 0.1199199       | -                 |          |              |
| 32        | rot      | 0.0437872       | -                 |          |              |
| 33        | rot      | 0.0320753       | -                 |          |              |

-----  
 ----- ZPE & THERMAL CONTRIBUTIONS -----  
 -----

Eelectronic                    [kJ/mol]    = -1936971.089  
 Ezpe                            [kJ/mol]    = +215.267  
 Eelectronic+Ezpe            [kJ/mol]    = -1936755.822  
  
 Eelectronic                    [hartrees] = -737.753224

Ezpe [hartrees] = +0.081991  
Eelectronic+Ezpe [hartrees] = -737.671233

Thermal Correction to Energy [kJ/mol] = +233.021  
Thermal Correction to Enthalpy [kJ/mol] = +235.499  
Thermal Correction to Gibbs [kJ/mol] = +132.724

!+++++  
END OF GAUSSIAN OUTPUT FILENAME: SU2-m062x.log  
!+++++

!+++++  
GAUSSIAN OUTPUT FILENAME: SU3-SU1-H2O-TS.log  
!+++++

1)LEVEL OF THEORY: B3LYP/DEF2TZVP  
Charge = 0 Multiplicity = 1 Stoichiometry C4H6N2O2S

-----  
----- OPTIMIZED GEOMETRY -----  
-----

| Center Number | Atomic Number | Atomic Type | Coordinates (Angstroms) |           |           |
|---------------|---------------|-------------|-------------------------|-----------|-----------|
|               |               |             | X                       | Y         | Z         |
| 1             | 6             | 0           | -2.346951               | -0.257107 | -0.006416 |
| 2             | 6             | 0           | -1.461807               | 0.907734  | -0.001955 |
| 3             | 7             | 0           | -0.085293               | 0.625091  | -0.011859 |
| 4             | 6             | 0           | 0.388818                | -0.600115 | 0.000913  |
| 5             | 16            | 0           | 2.092766                | -0.939670 | 0.004836  |
| 6             | 7             | 0           | -0.460041               | -1.669986 | 0.010621  |
| 7             | 6             | 0           | -1.823005               | -1.492695 | 0.001818  |
| 8             | 1             | 0           | -3.413723               | -0.094731 | -0.011867 |
| 9             | 1             | 0           | 1.055127                | 1.619953  | -0.056246 |
| 10            | 8             | 0           | 2.096042                | 1.876362  | -0.096958 |
| 11            | 1             | 0           | 2.332632                | 2.340059  | 0.717234  |
| 12            | 1             | 0           | 2.378784                | 0.652150  | -0.026075 |
| 13            | 8             | 0           | -1.857025               | 2.058237  | 0.012306  |
| 14            | 1             | 0           | -2.414133               | -2.398088 | 0.002944  |
| 15            | 1             | 0           | -0.060069               | -2.594056 | 0.016350  |

Rotational constants (GHZ): 1.9501150 1.1649455 0.7306856

-----  
----- FREQUENCIES AND ROTATIONAL CONSTANTS -----  
-----

| INDEX NO. | DOF | TYPE | CM-1 (UNSCALED) | CM-1 (SCALED BY ) | SYMMETRY | IR-INTENSITY |
|-----------|-----|------|-----------------|-------------------|----------|--------------|
| 1         | vib |      | -1039.86        | 0.00              | A        | 1067.3894    |
| 2         | vib |      | 78.15           | 0.00              | A        | 12.7925      |
| 3         | vib |      | 145.00          | 0.00              | A        | 0.2860       |
| 4         | vib |      | 160.62          | 0.00              | A        | 1.9964       |
| 5         | vib |      | 222.17          | 0.00              | A        | 38.3429      |
| 6         | vib |      | 373.85          | 0.00              | A        | 76.3448      |
| 7         | vib |      | 417.69          | 0.00              | A        | 6.9558       |
| 8         | vib |      | 429.05          | 0.00              | A        | 13.7123      |
| 9         | vib |      | 458.90          | 0.00              | A        | 7.6735       |
| 10        | vib |      | 480.12          | 0.00              | A        | 105.6686     |
| 11        | vib |      | 557.13          | 0.00              | A        | 65.4892      |
| 12        | vib |      | 563.91          | 0.00              | A        | 43.7725      |
| 13        | vib |      | 573.04          | 0.00              | A        | 44.2580      |
| 14        | vib |      | 585.69          | 0.00              | A        | 71.4774      |
| 15        | vib |      | 664.94          | 0.00              | A        | 1.1179       |
| 16        | vib |      | 721.07          | 0.00              | A        | 20.1050      |
| 17        | vib |      | 757.04          | 0.00              | A        | 6.6552       |
| 18        | vib |      | 841.90          | 0.00              | A        | 46.5323      |
| 19        | vib |      | 917.47          | 0.00              | A        | 109.9549     |
| 20        | vib |      | 971.68          | 0.00              | A        | 0.0407       |
| 21        | vib |      | 1021.74         | 0.00              | A        | 25.5675      |
| 22        | vib |      | 1077.83         | 0.00              | A        | 344.5189     |
| 23        | vib |      | 1081.35         | 0.00              | A        | 3.7945       |
| 24        | vib |      | 1164.06         | 0.00              | A        | 25.7957      |

|    |     |           |      |   |           |
|----|-----|-----------|------|---|-----------|
| 25 | vib | 1201.00   | 0.00 | A | 467.0743  |
| 26 | vib | 1221.86   | 0.00 | A | 8.9748    |
| 27 | vib | 1288.42   | 0.00 | A | 280.6196  |
| 28 | vib | 1418.95   | 0.00 | A | 44.2856   |
| 29 | vib | 1444.99   | 0.00 | A | 468.7887  |
| 30 | vib | 1531.98   | 0.00 | A | 32.7780   |
| 31 | vib | 1575.01   | 0.00 | A | 480.5669  |
| 32 | vib | 1615.09   | 0.00 | A | 334.6671  |
| 33 | vib | 1678.64   | 0.00 | A | 56.6249   |
| 34 | vib | 1748.43   | 0.00 | A | 642.4480  |
| 35 | vib | 2182.20   | 0.00 | A | 1746.1772 |
| 36 | vib | 3204.03   | 0.00 | A | 3.4057    |
| 37 | vib | 3233.39   | 0.00 | A | 0.4909    |
| 38 | vib | 3620.22   | 0.00 | A | 87.0722   |
| 39 | vib | 3791.44   | 0.00 | A | 78.1746   |
| 40 | rot | 0.0650488 | -    |   |           |
| 41 | rot | 0.0388584 | -    |   |           |
| 42 | rot | 0.0243730 | -    |   |           |

----- ZPE & THERMAL CONTRIBUTIONS -----

|                                |            |                |
|--------------------------------|------------|----------------|
| Eelectronic                    | [kJ/mol]   | = -2138156.27  |
| Ezpe                           | [kJ/mol]   | = +269.279     |
| Eelectronic+Ezpe               | [kJ/mol]   | = -2137886.991 |
| Eelectronic                    | [hartrees] | = -814.380602  |
| Ezpe                           | [hartrees] | = +0.102563    |
| Eelectronic+Ezpe               | [hartrees] | = -814.278039  |
| Thermal Correction to Energy   | [kJ/mol]   | = +290.785     |
| Thermal Correction to Enthalpy | [kJ/mol]   | = +293.266     |
| Thermal Correction to Gibbs    | [kJ/mol]   | = +181.354     |

!+++++  
 END OF GAUSSIAN OUTPUT FILENAME: SU3-SU1-H2O-TS.log

!+++++  
 GAUSSIAN OUTPUT FILENAME: TS-5SH-5HS-m062x.log

1) LEVEL OF THEORY: OPT=(TS,CALCFC,NOEIGENTEST,VTIGHT)  
 Charge = 0 Multiplicity = 1 Stoichiometry C3H4N2S

----- OPTIMIZED GEOMETRY -----

| Center Number | Atomic Number | Atomic Type | Coordinates (Angstroms) |           |           |
|---------------|---------------|-------------|-------------------------|-----------|-----------|
|               |               |             | X                       | Y         | Z         |
| 1             | 7             | 0           | 0.670822                | -0.823412 | -0.000000 |
| 2             | 6             | 0           | -0.000000               | 0.321632  | 0.000000  |
| 3             | 6             | 0           | -0.241266               | -1.855847 | -0.000000 |
| 4             | 6             | 0           | -1.486480               | -1.314035 | -0.000000 |
| 5             | 7             | 0           | -1.317566               | 0.066215  | -0.000000 |
| 6             | 1             | 0           | -2.045844               | 0.758480  | -0.000000 |
| 7             | 1             | 0           | -2.460539               | -1.768987 | -0.000000 |
| 8             | 1             | 0           | 0.046597                | -2.891790 | -0.000000 |
| 9             | 16            | 0           | 1.102811                | 1.640260  | 0.000000  |
| 10            | 1             | 0           | 1.708496                | 0.048012  | 0.000000  |

Rotational constants (GHZ):                    9.2824906                    2.2327991                    1.7998624

----- FREQUENCIES AND ROTATIONAL CONSTANTS -----

| INDEX NO. | DOF TYPE | CM-1 (UNSCALED) | CM-1 (SCALED BY ) | SYMMETRY | IR-INTENSITY |
|-----------|----------|-----------------|-------------------|----------|--------------|
| 1         | vib      | -1670.60        | 0.00              | A'       | 1762.8056    |



|    |     |           |      |     |          |
|----|-----|-----------|------|-----|----------|
| 2  | vib | 191.09    | 0.00 | A'' | 3.8428   |
| 3  | vib | 375.08    | 0.00 | A'  | 5.4372   |
| 4  | vib | 567.10    | 0.00 | A'  | 5.6869   |
| 5  | vib | 576.75    | 0.00 | A'' | 60.0674  |
| 6  | vib | 624.74    | 0.00 | A'' | 15.8143  |
| 7  | vib | 675.37    | 0.00 | A'' | 1.4843   |
| 8  | vib | 731.42    | 0.00 | A'' | 74.2266  |
| 9  | vib | 851.76    | 0.00 | A'' | 19.2515  |
| 10 | vib | 881.10    | 0.00 | A'' | 4.9406   |
| 11 | vib | 939.05    | 0.00 | A'  | 0.7044   |
| 12 | vib | 984.51    | 0.00 | A'  | 15.2904  |
| 13 | vib | 1083.95   | 0.00 | A'  | 32.8411  |
| 14 | vib | 1143.72   | 0.00 | A'  | 5.2557   |
| 15 | vib | 1184.65   | 0.00 | A'  | 0.5993   |
| 16 | vib | 1267.53   | 0.00 | A'  | 18.1253  |
| 17 | vib | 1366.09   | 0.00 | A'  | 39.8121  |
| 18 | vib | 1484.97   | 0.00 | A'  | 36.2610  |
| 19 | vib | 1514.69   | 0.00 | A'  | 187.6054 |
| 20 | vib | 1590.62   | 0.00 | A'  | 59.8127  |
| 21 | vib | 1786.09   | 0.00 | A'  | 27.3867  |
| 22 | vib | 3300.03   | 0.00 | A'  | 3.3905   |
| 23 | vib | 3319.57   | 0.00 | A'  | 0.0052   |
| 24 | vib | 3689.84   | 0.00 | A'  | 112.3264 |
| 25 | rot | 0.3096306 | -    |     |          |
| 26 | rot | 0.0744782 | -    |     |          |
| 27 | rot | 0.0600369 | -    |     |          |

----- ZPE & THERMAL CONTRIBUTIONS -----

Eelectronic [kJ/mol] = -1639230.55  
 Ezpe [kJ/mol] = +180.217  
 Eelectronic+Ezpe [kJ/mol] = -1639050.333

Eelectronic [hartrees] = -624.349857  
 Ezpe [hartrees] = +0.068641  
 Eelectronic+Ezpe [hartrees] = -624.281216

Thermal Correction to Energy [kJ/mol] = +192.751  
 Thermal Correction to Enthalpy [kJ/mol] = +195.230  
 Thermal Correction to Gibbs [kJ/mol] = +104.965

!+++++  
 END OF GAUSSIAN OUTPUT FILENAME: TS-5SH-5HS-m062x.log  
 !+++++

!+++++  
 GAUSSIAN OUTPUT FILENAME: TS-MeSU3-MeSU1-apf.log  
 !+++++

1) LEVEL OF THEORY: OPT=(TS,CALCF,NOEIGENTEST,VTIGHT)  
 Charge = 0 Multiplicity = 1 Stoichiometry C5H6N2OS

----- OPTIMIZED GEOMETRY -----

| Center Number | Atomic Number | Atomic Type | Coordinates (Angstroms) |           |          |
|---------------|---------------|-------------|-------------------------|-----------|----------|
|               |               |             | X                       | Y         | Z        |
| 1             | 7             | 0           | -1.156985               | -0.010556 | 0.000000 |
| 2             | 7             | 0           | 1.195599                | 0.017231  | 0.000000 |
| 3             | 6             | 0           | 0.000000                | 0.634041  | 0.000000 |
| 4             | 6             | 0           | -1.252405               | -1.402245 | 0.000000 |
| 5             | 6             | 0           | 0.054223                | -2.068429 | 0.000000 |
| 6             | 6             | 0           | 1.193913                | -1.363426 | 0.000000 |
| 7             | 1             | 0           | 0.072955                | -3.149293 | 0.000000 |
| 8             | 1             | 0           | 2.173674                | -1.824315 | 0.000000 |
| 9             | 16            | 0           | -0.323781               | 2.314867  | 0.000000 |
| 10            | 1             | 0           | -1.609891               | 1.337955  | 0.000000 |

|    |   |   |           |           |           |
|----|---|---|-----------|-----------|-----------|
| 11 | 8 | 0 | -2.312755 | -1.986063 | 0.000000  |
| 12 | 6 | 0 | 2.428325  | 0.784948  | 0.000000  |
| 13 | 1 | 0 | 2.480292  | 1.417348  | 0.887384  |
| 14 | 1 | 0 | 3.270589  | 0.095526  | 0.000000  |
| 15 | 1 | 0 | 2.480292  | 1.417348  | -0.887384 |

Rotational constants (GHZ):                    2.2328918                    1.2498790                    0.8053826

----- FREQUENCIES AND ROTATIONAL CONSTANTS -----

| INDEX NO. | DOF TYPE | CM-1(UNSCALED) | CM-1(SCALED BY ) | SYMMETRY | IR-INTENSITY |
|-----------|----------|----------------|------------------|----------|--------------|
| 1         | vib      | -1549.30       | 0.00             | A'       | 1253.1392    |
| 2         | vib      | 28.32          | 0.00             | A''      | 0.0231       |
| 3         | vib      | 100.11         | 0.00             | A''      | 0.8129       |
| 4         | vib      | 154.77         | 0.00             | A''      | 0.1168       |
| 5         | vib      | 235.24         | 0.00             | A''      | 3.4104       |
| 6         | vib      | 258.79         | 0.00             | A'       | 3.0429       |
| 7         | vib      | 347.55         | 0.00             | A'       | 2.3892       |
| 8         | vib      | 419.54         | 0.00             | A''      | 1.3864       |
| 9         | vib      | 458.34         | 0.00             | A'       | 19.9908      |
| 10        | vib      | 529.73         | 0.00             | A'       | 3.6837       |
| 11        | vib      | 568.01         | 0.00             | A'       | 1.4701       |
| 12        | vib      | 645.27         | 0.00             | A''      | 0.3283       |
| 13        | vib      | 717.11         | 0.00             | A'       | 12.5565      |
| 14        | vib      | 739.83         | 0.00             | A''      | 2.3412       |
| 15        | vib      | 802.93         | 0.00             | A'       | 3.2163       |
| 16        | vib      | 839.57         | 0.00             | A''      | 48.5418      |
| 17        | vib      | 885.28         | 0.00             | A''      | 13.2264      |
| 18        | vib      | 952.29         | 0.00             | A'       | 12.4898      |
| 19        | vib      | 971.10         | 0.00             | A''      | 0.0906       |
| 20        | vib      | 1042.75        | 0.00             | A'       | 1.4482       |
| 21        | vib      | 1146.08        | 0.00             | A''      | 0.0064       |
| 22        | vib      | 1149.96        | 0.00             | A'       | 79.6843      |
| 23        | vib      | 1204.25        | 0.00             | A'       | 4.6468       |
| 24        | vib      | 1234.51        | 0.00             | A'       | 52.1860      |
| 25        | vib      | 1291.11        | 0.00             | A'       | 31.1335      |
| 26        | vib      | 1405.11        | 0.00             | A'       | 68.6061      |
| 27        | vib      | 1460.43        | 0.00             | A'       | 72.7227      |
| 28        | vib      | 1465.71        | 0.00             | A'       | 254.6611     |
| 29        | vib      | 1472.64        | 0.00             | A''      | 14.1014      |
| 30        | vib      | 1510.51        | 0.00             | A'       | 136.5747     |
| 31        | vib      | 1519.29        | 0.00             | A'       | 231.0434     |
| 32        | vib      | 1692.38        | 0.00             | A'       | 95.9056      |
| 33        | vib      | 1782.20        | 0.00             | A'       | 585.9646     |
| 34        | vib      | 1827.18        | 0.00             | A'       | 73.4848      |
| 35        | vib      | 3063.70        | 0.00             | A'       | 19.1559      |
| 36        | vib      | 3136.54        | 0.00             | A''      | 4.7449       |
| 37        | vib      | 3165.90        | 0.00             | A'       | 4.6049       |
| 38        | vib      | 3214.14        | 0.00             | A'       | 2.7146       |
| 39        | vib      | 3241.37        | 0.00             | A'       | 0.3077       |
| 40        | rot      | 0.0744813      | -                |          |              |
| 41        | rot      | 0.0416915      | -                |          |              |
| 42        | rot      | 0.0268647      | -                |          |              |

----- ZPE & THERMAL CONTRIBUTIONS -----

|                                |            |                |
|--------------------------------|------------|----------------|
| Eelectronic                    | [kJ/mol]   | = -2039410.748 |
| Ezpe                           | [kJ/mol]   | = +279.206     |
| Eelectronic+Ezpe               | [kJ/mol]   | = -2039131.542 |
| Eelectronic                    | [hartrees] | = -776.770424  |
| Ezpe                           | [hartrees] | = +0.106344    |
| Eelectronic+Ezpe               | [hartrees] | = -776.664080  |
| Thermal Correction to Energy   | [kJ/mol]   | = +300.578     |
| Thermal Correction to Enthalpy | [kJ/mol]   | = +303.056     |
| Thermal Correction to Gibbs    | [kJ/mol]   | = +188.763     |

!+++++  
 END OF GAUSSIAN OUTPUT FILENAME: TS-MeSU3-MeSU1-apf.log  
 !+++++

!+++++  
 GAUSSIAN OUTPUT FILENAME: TS-MeSU3-MeSU1-apfd.log  
 !+++++

1) LEVEL OF THEORY: OPT=(TS,CALCF,NOEIGENTEST,VTIGHT)  
 Charge = 0 Multiplicity = 1 Stoichiometry C5H6N2OS

-----  
 ----- OPTIMIZED GEOMETRY -----  
 -----

| Center Number | Atomic Number | Atomic Type | Coordinates (Angstroms) |           |           |
|---------------|---------------|-------------|-------------------------|-----------|-----------|
|               |               |             | X                       | Y         | Z         |
| 1             | 7             | 0           | -1.156194               | -0.011178 | 0.000000  |
| 2             | 7             | 0           | 1.196781                | 0.018209  | 0.000000  |
| 3             | 6             | 0           | 0.000000                | 0.634154  | 0.000000  |
| 4             | 6             | 0           | -1.248985               | -1.404053 | 0.000000  |
| 5             | 6             | 0           | 0.059065                | -2.067871 | 0.000000  |
| 6             | 6             | 0           | 1.198343                | -1.361779 | 0.000000  |
| 7             | 1             | 0           | 0.077885                | -3.149238 | 0.000000  |
| 8             | 1             | 0           | 2.179301                | -1.820267 | 0.000000  |
| 9             | 16            | 0           | -0.331522               | 2.315339  | 0.000000  |
| 10            | 1             | 0           | -1.611789               | 1.335836  | 0.000000  |
| 11            | 8             | 0           | -2.306360               | -1.994170 | 0.000000  |
| 12            | 6             | 0           | 2.426030                | 0.789834  | 0.000000  |
| 13            | 1             | 0           | 2.473383                | 1.422453  | 0.887212  |
| 14            | 1             | 0           | 3.272238                | 0.105780  | 0.000000  |
| 15            | 1             | 0           | 2.473383                | 1.422453  | -0.887212 |

-----  
 Rotational constants (GHZ):                    2.2305139                    1.2498696                    0.8050676  
 -----

-----  
 ----- FREQUENCIES AND ROTATIONAL CONSTANTS -----  
 -----

| INDEX NO. | DOF TYPE | CM-1 (UNSCALED) | CM-1 (SCALED BY ) | SYMMETRY | IR-INTENSITY |
|-----------|----------|-----------------|-------------------|----------|--------------|
| 1         | vib      | -1543.70        | 0.00              | A'       | 1253.4805    |
| 2         | vib      | 31.94           | 0.00              | A''      | 0.0382       |
| 3         | vib      | 98.76           | 0.00              | A''      | 0.8233       |
| 4         | vib      | 153.33          | 0.00              | A''      | 0.1052       |
| 5         | vib      | 233.85          | 0.00              | A''      | 3.3697       |
| 6         | vib      | 269.44          | 0.00              | A'       | 3.2274       |
| 7         | vib      | 357.08          | 0.00              | A'       | 2.2653       |
| 8         | vib      | 418.57          | 0.00              | A''      | 1.3909       |
| 9         | vib      | 458.29          | 0.00              | A'       | 19.9036      |
| 10        | vib      | 533.23          | 0.00              | A'       | 4.1140       |
| 11        | vib      | 581.17          | 0.00              | A'       | 0.7861       |
| 12        | vib      | 645.43          | 0.00              | A''      | 0.3366       |
| 13        | vib      | 716.53          | 0.00              | A'       | 12.9645      |
| 14        | vib      | 739.48          | 0.00              | A''      | 2.3542       |
| 15        | vib      | 804.22          | 0.00              | A'       | 3.1881       |
| 16        | vib      | 840.15          | 0.00              | A''      | 48.4198      |
| 17        | vib      | 884.73          | 0.00              | A''      | 13.2409      |
| 18        | vib      | 961.35          | 0.00              | A'       | 14.9262      |
| 19        | vib      | 970.79          | 0.00              | A''      | 0.0610       |
| 20        | vib      | 1049.78         | 0.00              | A'       | 2.1722       |
| 21        | vib      | 1146.86         | 0.00              | A''      | 0.0035       |
| 22        | vib      | 1153.13         | 0.00              | A'       | 85.5108      |
| 23        | vib      | 1208.78         | 0.00              | A'       | 3.0934       |
| 24        | vib      | 1238.56         | 0.00              | A'       | 48.8460      |
| 25        | vib      | 1300.70         | 0.00              | A'       | 38.2075      |
| 26        | vib      | 1409.41         | 0.00              | A'       | 62.1680      |
| 27        | vib      | 1464.40         | 0.00              | A'       | 299.9770     |
| 28        | vib      | 1473.53         | 0.00              | A''      | 14.2238      |
| 29        | vib      | 1474.35         | 0.00              | A'       | 32.0809      |
| 30        | vib      | 1513.11         | 0.00              | A'       | 153.0427     |
| 31        | vib      | 1524.47         | 0.00              | A'       | 210.1520     |
| 32        | vib      | 1693.43         | 0.00              | A'       | 100.9809     |

|    |     |           |      |     |          |
|----|-----|-----------|------|-----|----------|
| 33 | vib | 1781.74   | 0.00 | A'  | 579.3780 |
| 34 | vib | 1829.72   | 0.00 | A'  | 67.9858  |
| 35 | vib | 3065.60   | 0.00 | A'  | 19.1796  |
| 36 | vib | 3138.39   | 0.00 | A'' | 4.7615   |
| 37 | vib | 3168.75   | 0.00 | A'  | 4.5122   |
| 38 | vib | 3213.25   | 0.00 | A'  | 2.6858   |
| 39 | vib | 3238.15   | 0.00 | A'  | 0.3831   |
| 40 | rot | 0.0744019 | -    |     |          |
| 41 | rot | 0.0416912 | -    |     |          |
| 42 | rot | 0.0268542 | -    |     |          |

----- ZPE & THERMAL CONTRIBUTIONS -----

Eelectronic [kJ/mol] = -2039433.848  
 Ezpe [kJ/mol] = +279.834  
 Eelectronic+Ezpe [kJ/mol] = -2039154.014

Eelectronic [hartrees] = -776.779222  
 Ezpe [hartrees] = +0.106583  
 Eelectronic+Ezpe [hartrees] = -776.672639

Thermal Correction to Energy [kJ/mol] = +301.100  
 Thermal Correction to Enthalpy [kJ/mol] = +303.579  
 Thermal Correction to Gibbs [kJ/mol] = +189.706

!+++++  
 END OF GAUSSIAN OUTPUT FILENAME: TS-MeSU3-MeSU1-apfd.log  
 !+++++

!+++++  
 GAUSSIAN OUTPUT FILENAME: TS-MeSU3-MeSU1-b2plyp.log  
 !+++++

1) LEVEL OF THEORY: OPT=(TS,CALCF,NOEIGENTEST,VTIGHT)  
 Charge = 0 Multiplicity = 1 Stoichiometry C5H6N2OS

----- OPTIMIZED GEOMETRY -----

| Center Number | Atomic Number | Atomic Type | Coordinates (Angstroms) |           |           |
|---------------|---------------|-------------|-------------------------|-----------|-----------|
|               |               |             | X                       | Y         | Z         |
| 1             | 7             | 0           | -1.161567               | -0.012405 | 0.000000  |
| 2             | 7             | 0           | 1.199259                | 0.019530  | 0.000000  |
| 3             | 6             | 0           | -0.000000               | 0.638210  | 0.000000  |
| 4             | 6             | 0           | -1.252981               | -1.411905 | 0.000000  |
| 5             | 6             | 0           | 0.056579                | -2.074362 | 0.000000  |
| 6             | 6             | 0           | 1.199638                | -1.365779 | 0.000000  |
| 7             | 1             | 0           | 0.078859                | -3.153492 | 0.000000  |
| 8             | 1             | 0           | 2.177638                | -1.825112 | 0.000000  |
| 9             | 16            | 0           | -0.328928               | 2.323877  | 0.000000  |
| 10            | 1             | 0           | -1.623100               | 1.333892  | 0.000000  |
| 11            | 8             | 0           | -2.317415               | -1.999928 | 0.000000  |
| 12            | 6             | 0           | 2.438826                | 0.791818  | 0.000000  |
| 13            | 1             | 0           | 2.487629                | 1.421739  | 0.886417  |
| 14            | 1             | 0           | 3.277296                | 0.100861  | 0.000000  |
| 15            | 1             | 0           | 2.487629                | 1.421739  | -0.886417 |

Rotational constants (GHZ): 2.2175259 1.2398137 0.7991956

----- FREQUENCIES AND ROTATIONAL CONSTANTS -----

| INDEX NO. | DOF TYPE | CM-1 (UNSCALED) | CM-1 (SCALED BY ) | SYMMETRY | IR-INTENSITY |
|-----------|----------|-----------------|-------------------|----------|--------------|
| 1         | vib      | -1587.40        | 0.00              | A'       | 1262.4607    |
| 2         | vib      | 36.50           | 0.00              | A''      | 0.0398       |
| 3         | vib      | 99.52           | 0.00              | A''      | 0.7719       |
| 4         | vib      | 152.90          | 0.00              | A''      | 0.1471       |

|    |     |           |      |     |          |
|----|-----|-----------|------|-----|----------|
| 5  | vib | 230.47    | 0.00 | A'' | 3.5058   |
| 6  | vib | 259.82    | 0.00 | A'  | 3.2896   |
| 7  | vib | 344.40    | 0.00 | A'  | 2.2245   |
| 8  | vib | 418.71    | 0.00 | A'' | 1.3384   |
| 9  | vib | 455.19    | 0.00 | A'  | 20.2871  |
| 10 | vib | 523.18    | 0.00 | A'  | 3.9223   |
| 11 | vib | 563.51    | 0.00 | A'  | 1.3212   |
| 12 | vib | 638.30    | 0.00 | A'' | 0.1826   |
| 13 | vib | 712.04    | 0.00 | A'  | 12.3799  |
| 14 | vib | 732.35    | 0.00 | A'' | 1.4654   |
| 15 | vib | 792.96    | 0.00 | A'  | 2.1819   |
| 16 | vib | 833.72    | 0.00 | A'' | 50.4869  |
| 17 | vib | 880.50    | 0.00 | A'' | 11.3325  |
| 18 | vib | 938.60    | 0.00 | A'  | 11.3912  |
| 19 | vib | 962.99    | 0.00 | A'' | 0.1272   |
| 20 | vib | 1039.93   | 0.00 | A'  | 2.4512   |
| 21 | vib | 1156.37   | 0.00 | A'  | 95.5676  |
| 22 | vib | 1158.11   | 0.00 | A'' | 0.1048   |
| 23 | vib | 1192.84   | 0.00 | A'  | 4.8331   |
| 24 | vib | 1229.33   | 0.00 | A'  | 41.2422  |
| 25 | vib | 1277.51   | 0.00 | A'  | 48.4382  |
| 26 | vib | 1405.39   | 0.00 | A'  | 117.2761 |
| 27 | vib | 1457.02   | 0.00 | A'  | 357.4193 |
| 28 | vib | 1463.87   | 0.00 | A'  | 113.8987 |
| 29 | vib | 1494.24   | 0.00 | A'' | 12.7520  |
| 30 | vib | 1495.58   | 0.00 | A'  | 43.7272  |
| 31 | vib | 1531.15   | 0.00 | A'  | 114.4232 |
| 32 | vib | 1665.38   | 0.00 | A'  | 51.9602  |
| 33 | vib | 1741.59   | 0.00 | A'  | 581.6996 |
| 34 | vib | 1807.63   | 0.00 | A'  | 41.2425  |
| 35 | vib | 3073.73   | 0.00 | A'  | 19.4558  |
| 36 | vib | 3147.85   | 0.00 | A'' | 4.9682   |
| 37 | vib | 3173.34   | 0.00 | A'  | 4.8028   |
| 38 | vib | 3222.81   | 0.00 | A'  | 2.5151   |
| 39 | vib | 3244.84   | 0.00 | A'  | 0.4361   |
| 40 | rot | 0.0739687 | -    |     |          |
| 41 | rot | 0.0413557 | -    |     |          |
| 42 | rot | 0.0266583 | -    |     |          |

----- ZPE & THERMAL CONTRIBUTIONS -----

|                                |            |                |
|--------------------------------|------------|----------------|
| Eelectronic                    | [kJ/mol]   | = -2039350.658 |
| Ezpe                           | [kJ/mol]   | = +278.455     |
| Eelectronic+Ezpe               | [kJ/mol]   | = -2039072.203 |
|                                |            |                |
| Eelectronic                    | [hartrees] | = -776.747537  |
| Ezpe                           | [hartrees] | = +0.106058    |
| Eelectronic+Ezpe               | [hartrees] | = -776.641479  |
|                                |            |                |
| Thermal Correction to Energy   | [kJ/mol]   | = +299.890     |
| Thermal Correction to Enthalpy | [kJ/mol]   | = +302.371     |
| Thermal Correction to Gibbs    | [kJ/mol]   | = +188.469     |

!+++++  
 END OF GAUSSIAN OUTPUT FILENAME: TS-MeSU3-MeSU1-b2plyp.log  
 !+++++

!+++++  
 GAUSSIAN OUTPUT FILENAME: TS-MeSU3-MeSU1-wb97xd.log  
 !+++++

1) LEVEL OF THEORY: OPT=(TS,CALCF,NOEIGENTEST,VTIGHT)  
 Charge = 0 Multiplicity = 1 Stoichiometry C5H6N2OS

----- OPTIMIZED GEOMETRY -----

| Center | Atomic | Atomic | Coordinates (Angstroms) |
|--------|--------|--------|-------------------------|
|--------|--------|--------|-------------------------|

| Number | Number | Type | X         | Y         | Z         |
|--------|--------|------|-----------|-----------|-----------|
| 1      | 7      | 0    | -1.154848 | -0.012245 | 0.000000  |
| 2      | 7      | 0    | 1.195280  | 0.019903  | 0.000000  |
| 3      | 6      | 0    | -0.000000 | 0.632779  | 0.000000  |
| 4      | 6      | 0    | -1.247029 | -1.404700 | 0.000000  |
| 5      | 6      | 0    | 0.063573  | -2.070290 | 0.000000  |
| 6      | 6      | 0    | 1.197898  | -1.363488 | 0.000000  |
| 7      | 1      | 0    | 0.084306  | -3.149686 | 0.000000  |
| 8      | 1      | 0    | 2.177090  | -1.822188 | 0.000000  |
| 9      | 16     | 0    | -0.336724 | 2.314336  | 0.000000  |
| 10     | 1      | 0    | -1.614830 | 1.328979  | 0.000000  |
| 11     | 8      | 0    | -2.303534 | -1.988837 | 0.000000  |
| 12     | 6      | 0    | 2.428627  | 0.792211  | 0.000000  |
| 13     | 1      | 0    | 2.477913  | 1.422814  | 0.887340  |
| 14     | 1      | 0    | 3.272031  | 0.105907  | 0.000000  |
| 15     | 1      | 0    | 2.477913  | 1.422814  | -0.887340 |

Rotational constants (GHZ):                    2.2260835                    1.2522917                    0.8054936

----- FREQUENCIES AND ROTATIONAL CONSTANTS -----

| INDEX NO. | DOF | TYPE | CM-1 (UNSCALED) | CM-1 (SCALED BY ) | SYMMETRY | IR-INTENSITY |
|-----------|-----|------|-----------------|-------------------|----------|--------------|
| 1         | vib |      | -1616.94        | 0.00              | A'       | 1420.1512    |
| 2         | vib |      | 49.04           | 0.00              | A''      | 0.0391       |
| 3         | vib |      | 100.19          | 0.00              | A''      | 0.8698       |
| 4         | vib |      | 157.98          | 0.00              | A''      | 0.1127       |
| 5         | vib |      | 237.13          | 0.00              | A''      | 3.5609       |
| 6         | vib |      | 266.52          | 0.00              | A'       | 3.1979       |
| 7         | vib |      | 352.89          | 0.00              | A'       | 2.4164       |
| 8         | vib |      | 424.11          | 0.00              | A''      | 1.4083       |
| 9         | vib |      | 461.67          | 0.00              | A'       | 22.1758      |
| 10        | vib |      | 534.05          | 0.00              | A'       | 3.7816       |
| 11        | vib |      | 575.38          | 0.00              | A'       | 1.8211       |
| 12        | vib |      | 650.71          | 0.00              | A''      | 0.2990       |
| 13        | vib |      | 719.92          | 0.00              | A'       | 13.4713      |
| 14        | vib |      | 748.05          | 0.00              | A''      | 2.0590       |
| 15        | vib |      | 806.35          | 0.00              | A'       | 3.3578       |
| 16        | vib |      | 847.80          | 0.00              | A''      | 50.7190      |
| 17        | vib |      | 895.69          | 0.00              | A''      | 16.1826      |
| 18        | vib |      | 955.38          | 0.00              | A'       | 14.6710      |
| 19        | vib |      | 989.70          | 0.00              | A''      | 0.0615       |
| 20        | vib |      | 1052.63         | 0.00              | A'       | 1.1489       |
| 21        | vib |      | 1158.14         | 0.00              | A''      | 0.0464       |
| 22        | vib |      | 1162.76         | 0.00              | A'       | 84.9355      |
| 23        | vib |      | 1213.34         | 0.00              | A'       | 4.7633       |
| 24        | vib |      | 1246.80         | 0.00              | A'       | 52.8251      |
| 25        | vib |      | 1299.33         | 0.00              | A'       | 27.7185      |
| 26        | vib |      | 1418.66         | 0.00              | A'       | 72.3704      |
| 27        | vib |      | 1476.43         | 0.00              | A'       | 102.0000     |
| 28        | vib |      | 1480.66         | 0.00              | A'       | 258.6088     |
| 29        | vib |      | 1487.46         | 0.00              | A''      | 14.2506      |
| 30        | vib |      | 1521.65         | 0.00              | A'       | 158.8778     |
| 31        | vib |      | 1532.37         | 0.00              | A'       | 256.6957     |
| 32        | vib |      | 1710.90         | 0.00              | A'       | 112.3298     |
| 33        | vib |      | 1804.98         | 0.00              | A'       | 619.6981     |
| 34        | vib |      | 1854.57         | 0.00              | A'       | 80.6662      |
| 35        | vib |      | 3069.64         | 0.00              | A'       | 19.0216      |
| 36        | vib |      | 3145.29         | 0.00              | A''      | 5.0564       |
| 37        | vib |      | 3172.47         | 0.00              | A'       | 5.0041       |
| 38        | vib |      | 3224.79         | 0.00              | A'       | 2.4463       |
| 39        | vib |      | 3250.94         | 0.00              | A'       | 0.2837       |
| 40        | rot |      | 0.0742542       | -                 |          |              |
| 41        | rot |      | 0.0417720       | -                 |          |              |
| 42        | rot |      | 0.0268684       | -                 |          |              |

----- ZPE & THERMAL CONTRIBUTIONS -----

Eelectronic                    [kJ/mol]                    = -2040133.052

Ezpe [kJ/mol] = +281.459  
 Eelectronic+Ezpe [kJ/mol] = -2039851.593

Eelectronic [hartrees] = -777.045535  
 Ezpe [hartrees] = +0.107202  
 Eelectronic+Ezpe [hartrees] = -776.938333

Thermal Correction to Energy [kJ/mol] = +302.552  
 Thermal Correction to Enthalpy [kJ/mol] = +305.033  
 Thermal Correction to Gibbs [kJ/mol] = +192.394

!+++++  
 END OF GAUSSIAN OUTPUT FILENAME: TS-MeSU3-MeSU1-wb97xd.log  
 !+++++

!+++++  
 GAUSSIAN OUTPUT FILENAME: TS-NNSH-NNHS-m062x.log  
 !+++++

1) LEVEL OF THEORY: OPT=(TS,CALCF,NOEIGENTEST,VTIGHT)  
 Charge = 0 Multiplicity = 1 Stoichiometry C4H4N2S

-----  
 ----- OPTIMIZED GEOMETRY -----  
 -----

| Center Number | Atomic Number | Atomic Type | Coordinates (Angstroms) |           |           |
|---------------|---------------|-------------|-------------------------|-----------|-----------|
|               |               |             | X                       | Y         | Z         |
| 1             | 6             | 0           | 1.359127                | 0.218220  | 0.000000  |
| 2             | 7             | 0           | -0.924015               | -0.427079 | -0.000000 |
| 3             | 6             | 0           | 0.000000                | 0.560400  | -0.000000 |
| 4             | 6             | 0           | 1.648988                | -1.122296 | 0.000000  |
| 5             | 6             | 0           | 0.604644                | -2.057464 | 0.000000  |
| 6             | 7             | 0           | -0.668890               | -1.701875 | 0.000000  |
| 7             | 1             | 0           | 0.793044                | -3.121879 | 0.000000  |
| 8             | 16            | 0           | -0.894651               | 2.019229  | -0.000000 |
| 9             | 1             | 0           | -1.804105               | 0.612571  | -0.000000 |
| 10            | 1             | 0           | 2.674205                | -1.468541 | 0.000000  |
| 11            | 1             | 0           | 2.125067                | 0.979695  | 0.000000  |

Rotational constants (GHZ): 5.9089909 1.7426513 1.3457648

-----  
 ----- FREQUENCIES AND ROTATIONAL CONSTANTS -----  
 -----

| INDEX NO. | DOF TYPE | CM-1 (UNSCALED) | CM-1 (SCALED BY ) | SYMMETRY | IR-INTENSITY |
|-----------|----------|-----------------|-------------------|----------|--------------|
| 1         | vib      | -1600.64        | 0.00              | A'       | 1126.8491    |
| 2         | vib      | 160.62          | 0.00              | A''      | 0.3364       |
| 3         | vib      | 364.36          | 0.00              | A'       | 7.2994       |
| 4         | vib      | 395.74          | 0.00              | A''      | 0.4459       |
| 5         | vib      | 476.07          | 0.00              | A''      | 1.3189       |
| 6         | vib      | 507.82          | 0.00              | A'       | 3.4546       |
| 7         | vib      | 667.94          | 0.00              | A'       | 4.6894       |
| 8         | vib      | 759.42          | 0.00              | A''      | 9.0772       |
| 9         | vib      | 761.82          | 0.00              | A'       | 20.9537      |
| 10        | vib      | 825.89          | 0.00              | A''      | 35.4521      |
| 11        | vib      | 946.54          | 0.00              | A''      | 2.9143       |
| 12        | vib      | 954.61          | 0.00              | A''      | 3.9359       |
| 13        | vib      | 1033.83         | 0.00              | A''      | 0.0330       |
| 14        | vib      | 1053.80         | 0.00              | A'       | 13.0931      |
| 15        | vib      | 1081.95         | 0.00              | A'       | 1.2064       |
| 16        | vib      | 1123.21         | 0.00              | A'       | 68.4949      |
| 17        | vib      | 1177.67         | 0.00              | A'       | 51.1919      |
| 18        | vib      | 1221.73         | 0.00              | A'       | 25.4176      |
| 19        | vib      | 1264.67         | 0.00              | A'       | 66.3729      |
| 20        | vib      | 1409.10         | 0.00              | A'       | 28.0003      |
| 21        | vib      | 1473.78         | 0.00              | A'       | 117.3081     |
| 22        | vib      | 1600.92         | 0.00              | A'       | 1.2500       |
| 23        | vib      | 1639.00         | 0.00              | A'       | 115.8556     |
| 24        | vib      | 1824.93         | 0.00              | A'       | 35.6306      |

|    |     |           |      |    |        |
|----|-----|-----------|------|----|--------|
| 25 | vib | 3222.51   | 0.00 | A' | 1.1107 |
| 26 | vib | 3240.32   | 0.00 | A' | 1.4825 |
| 27 | vib | 3250.86   | 0.00 | A' | 0.1836 |
| 28 | rot | 0.1971027 | -    |    |        |
| 29 | rot | 0.0581286 | -    |    |        |
| 30 | rot | 0.0448899 | -    |    |        |

----- ZPE & THERMAL CONTRIBUTIONS -----

|                  |          |                |
|------------------|----------|----------------|
| Eelectronic      | [kJ/mol] | = -1739192.062 |
| Ezpe             | [kJ/mol] | = +194.030     |
| Eelectronic+Ezpe | [kJ/mol] | = -1738998.032 |

|                  |            |               |
|------------------|------------|---------------|
| Eelectronic      | [hartrees] | = -662.423181 |
| Ezpe             | [hartrees] | = +0.073902   |
| Eelectronic+Ezpe | [hartrees] | = -662.349279 |

|                                |          |            |
|--------------------------------|----------|------------|
| Thermal Correction to Energy   | [kJ/mol] | = +207.743 |
| Thermal Correction to Enthalpy | [kJ/mol] | = +210.221 |
| Thermal Correction to Gibbs    | [kJ/mol] | = +116.325 |

!+++++  
 END OF GAUSSIAN OUTPUT FILENAME: TS-NNSH-NNHS-m062x.log  
 !+++++

!+++++  
 GAUSSIAN OUTPUT FILENAME: TS-NSU3-dimer-qb3.log  
 !+++++

1) LEVEL OF THEORY: CBS-QB3  
 Charge = 0 Multiplicity = 1 Stoichiometry C6H6N6O2S2

----- OPTIMIZED GEOMETRY -----

| Center Number | Atomic Number | Atomic Type | Coordinates (Angstroms) |           |           |
|---------------|---------------|-------------|-------------------------|-----------|-----------|
|               |               |             | X                       | Y         | Z         |
| 1             | 7             | 0           | 1.778677                | -0.343756 | -0.000027 |
| 2             | 7             | 0           | 3.200405                | 1.487368  | 0.000039  |
| 3             | 6             | 0           | 1.939990                | 0.963275  | 0.000007  |
| 4             | 6             | 0           | 2.884322                | -1.198247 | -0.000024 |
| 5             | 6             | 0           | 4.196162                | -0.519611 | -0.000005 |
| 6             | 7             | 0           | 4.341011                | 0.759934  | 0.000026  |
| 7             | 1             | 0           | 5.095777                | -1.123651 | -0.000016 |
| 8             | 16            | 0           | 0.641325                | 2.112912  | 0.000010  |
| 9             | 1             | 0           | -0.494279               | 1.139062  | -0.000014 |
| 10            | 8             | 0           | 2.763001                | -2.407444 | -0.000038 |
| 11            | 1             | 0           | 3.334165                | 2.487941  | 0.000059  |
| 12            | 7             | 0           | -1.778677               | 0.343756  | -0.000024 |
| 13            | 7             | 0           | -3.200404               | -1.487368 | 0.000031  |
| 14            | 6             | 0           | -1.939990               | -0.963274 | 0.000005  |
| 15            | 6             | 0           | -2.884323               | 1.198247  | -0.000024 |
| 16            | 6             | 0           | -4.196162               | 0.519611  | 0.000001  |
| 17            | 7             | 0           | -4.341011               | -0.759935 | 0.000027  |
| 18            | 1             | 0           | -5.095777               | 1.123650  | -0.000003 |
| 19            | 16            | 0           | -0.641324               | -2.112912 | 0.000011  |
| 20            | 1             | 0           | 0.494278                | -1.139061 | -0.000016 |
| 21            | 8             | 0           | -2.763002               | 2.407444  | -0.000043 |
| 22            | 1             | 0           | -3.334164               | -2.487941 | 0.000051  |

Rotational constants (GHZ):                    0.7981956                    0.2576413                    0.1947727

----- FREQUENCIES AND ROTATIONAL CONSTANTS -----

| INDEX NO. | DOF TYPE | CM-1 (UNSCALED) | CM-1 (SCALED BY 0.99) | SYMMETRY | IR-INTENSITY |
|-----------|----------|-----------------|-----------------------|----------|--------------|
| 1         | vib      | -643.14         | -636.71               | A        | 0.0000       |



|    |     |           |         |   |           |
|----|-----|-----------|---------|---|-----------|
| 2  | vib | 22.40     | 22.18   | A | 0.0578    |
| 3  | vib | 38.54     | 38.15   | A | 7.2432    |
| 4  | vib | 65.55     | 64.89   | A | 0.0000    |
| 5  | vib | 96.25     | 95.29   | A | 0.0000    |
| 6  | vib | 99.14     | 98.15   | A | 97.7965   |
| 7  | vib | 123.56    | 122.32  | A | 0.0000    |
| 8  | vib | 128.34    | 127.06  | A | 0.6745    |
| 9  | vib | 158.21    | 156.63  | A | 0.7506    |
| 10 | vib | 169.64    | 167.95  | A | 0.0000    |
| 11 | vib | 279.15    | 276.36  | A | 0.0000    |
| 12 | vib | 291.40    | 288.48  | A | 407.4345  |
| 13 | vib | 409.55    | 405.45  | A | 0.0000    |
| 14 | vib | 427.64    | 423.36  | A | 0.0000    |
| 15 | vib | 432.11    | 427.79  | A | 0.0000    |
| 16 | vib | 432.85    | 428.52  | A | 1.7142    |
| 17 | vib | 435.91    | 431.55  | A | 42.4978   |
| 18 | vib | 507.85    | 502.77  | A | 7.5708    |
| 19 | vib | 520.04    | 514.84  | A | 0.0000    |
| 20 | vib | 585.44    | 579.59  | A | 109.5770  |
| 21 | vib | 593.88    | 587.95  | A | 0.0000    |
| 22 | vib | 602.77    | 596.74  | A | 0.0000    |
| 23 | vib | 609.53    | 603.43  | A | 164.0016  |
| 24 | vib | 660.00    | 653.40  | A | 0.0000    |
| 25 | vib | 662.43    | 655.81  | A | 42.4271   |
| 26 | vib | 702.38    | 695.36  | A | 47.9607   |
| 27 | vib | 713.28    | 706.15  | A | 0.0000    |
| 28 | vib | 765.41    | 757.76  | A | 0.1812    |
| 29 | vib | 767.42    | 759.74  | A | 0.0000    |
| 30 | vib | 900.32    | 891.31  | A | 0.0000    |
| 31 | vib | 920.27    | 911.07  | A | 45.7619   |
| 32 | vib | 920.80    | 911.59  | A | 374.8905  |
| 33 | vib | 922.03    | 912.81  | A | 0.0000    |
| 34 | vib | 922.35    | 913.12  | A | 0.0000    |
| 35 | vib | 928.78    | 919.50  | A | 8.3527    |
| 36 | vib | 1030.22   | 1019.92 | A | 6778.8842 |
| 37 | vib | 1052.87   | 1042.34 | A | 140.0984  |
| 38 | vib | 1057.42   | 1046.85 | A | 0.0000    |
| 39 | vib | 1074.23   | 1063.49 | A | 0.0000    |
| 40 | vib | 1089.26   | 1078.37 | A | 723.6271  |
| 41 | vib | 1183.72   | 1171.89 | A | 289.2187  |
| 42 | vib | 1188.91   | 1177.02 | A | 0.0000    |
| 43 | vib | 1266.62   | 1253.95 | A | 388.6594  |
| 44 | vib | 1273.16   | 1260.43 | A | 0.0000    |
| 45 | vib | 1305.45   | 1292.40 | A | 116.6194  |
| 46 | vib | 1345.05   | 1331.60 | A | 0.0000    |
| 47 | vib | 1360.76   | 1347.15 | A | 185.9834  |
| 48 | vib | 1362.37   | 1348.75 | A | 0.0000    |
| 49 | vib | 1465.04   | 1450.39 | A | 0.0000    |
| 50 | vib | 1465.29   | 1450.64 | A | 101.9813  |
| 51 | vib | 1561.37   | 1545.76 | A | 0.0000    |
| 52 | vib | 1577.71   | 1561.94 | A | 547.5411  |
| 53 | vib | 1650.66   | 1634.15 | A | 0.0000    |
| 54 | vib | 1650.88   | 1634.37 | A | 16.6194   |
| 55 | vib | 1762.54   | 1744.92 | A | 0.0000    |
| 56 | vib | 1771.82   | 1754.10 | A | 1014.6139 |
| 57 | vib | 3195.42   | 3163.46 | A | 2.0131    |
| 58 | vib | 3195.44   | 3163.48 | A | 0.0000    |
| 59 | vib | 3620.61   | 3584.41 | A | 209.3380  |
| 60 | vib | 3620.93   | 3584.72 | A | 0.0000    |
| 61 | rot | 0.0266249 | -       |   |           |
| 62 | rot | 0.0085940 | -       |   |           |
| 63 | rot | 0.0064969 | -       |   |           |

----- ZPE & THERMAL CONTRIBUTIONS -----

Eelectronic [kJ/mol] = -3958657.948  
Ezpe [kJ/mol] = +352.557  
Eelectronic+Ezpe [kJ/mol] = -3958305.391  
  
Eelectronic [hartrees] = -1507.772976

Ezpe [hartrees] = +0.134282  
Eelectronic+Ezpe [hartrees] = -1507.638694

Thermal Correction to Energy [kJ/mol] = +389.509  
Thermal Correction to Enthalpy [kJ/mol] = +391.987  
Thermal Correction to Gibbs [kJ/mol] = +237.836

-----  
ENERGETICS  
-----

Temperature= 298.150000  
E(ZPE)= 0.132939 E(Thermal)= 0.147118  
E(SCF)= -1502.352182 DE(MP2)= -2.930215  
DE(CBS)= -0.288818 DE(MP34)= -0.058655  
DE(CCSD)= -0.105138 DE(Int)= 0.094921  
DE(Empirical)= -0.127199  
CBS-QB3 (0 K)= -1505.634346 CBS-QB3 Energy= -1505.620168  
CBS-QB3 Enthalpy= -1505.619223 CBS-QB3 Free Energy= -1505.678155

!+++++  
END OF GAUSSIAN OUTPUT FILENAME: TS-NSU3-dimer-qb3.log  
!+++++

!+++++  
GAUSSIAN OUTPUT FILENAME: TS-NSU3-NSU1-m062x.log  
!+++++

1) LEVEL OF THEORY: M062X/DEF2TZVP  
Charge = 0 Multiplicity = 1 Stoichiometry C3H3N3OS

-----  
OPTIMIZED GEOMETRY  
-----

| Center Number | Atomic Number | Atomic Type | Coordinates (Angstroms) |           |           |
|---------------|---------------|-------------|-------------------------|-----------|-----------|
|               |               |             | X                       | Y         | Z         |
| 1             | 7             | 0           | -0.841605               | -0.227949 | -0.000000 |
| 2             | 7             | 0           | 1.323597                | 0.625141  | 0.000000  |
| 3             | 6             | 0           | 0.000000                | 0.799723  | 0.000000  |
| 4             | 6             | 0           | -0.369710               | -1.530435 | -0.000000 |
| 5             | 6             | 0           | 1.120030                | -1.606360 | -0.000000 |
| 6             | 7             | 0           | 1.906721                | -0.601272 | 0.000000  |
| 7             | 1             | 0           | 1.572712                | -2.589767 | -0.000000 |
| 8             | 16            | 0           | -0.906419               | 2.243706  | 0.000000  |
| 9             | 1             | 0           | -1.750181               | 0.840944  | 0.000000  |
| 10            | 8             | 0           | -1.062745               | -2.513155 | -0.000000 |
| 11            | 1             | 0           | 1.959222                | 1.405756  | 0.000000  |

Rotational constants (GHZ): 3.4328916 1.4114974 1.0002330

-----  
FREQUENCIES AND ROTATIONAL CONSTANTS  
-----

| INDEX NO. | DOF TYPE | CM-1 (UNSCALED) | CM-1 (SCALED BY ) | SYMMETRY | IR-INTENSITY |
|-----------|----------|-----------------|-------------------|----------|--------------|
| 1         | vib      | -1615.61        | 0.00              | A'       | 1532.2104    |
| 2         | vib      | 140.89          | 0.00              | A''      | 0.9230       |
| 3         | vib      | 156.50          | 0.00              | A''      | 0.0222       |
| 4         | vib      | 304.95          | 0.00              | A'       | 6.7675       |
| 5         | vib      | 440.22          | 0.00              | A''      | 2.1482       |
| 6         | vib      | 448.09          | 0.00              | A'       | 6.6233       |
| 7         | vib      | 538.50          | 0.00              | A'       | 9.1700       |
| 8         | vib      | 585.84          | 0.00              | A'       | 32.7082      |
| 9         | vib      | 608.79          | 0.00              | A''      | 56.5121      |
| 10        | vib      | 655.17          | 0.00              | A''      | 48.7119      |
| 11        | vib      | 698.80          | 0.00              | A'       | 12.1536      |
| 12        | vib      | 769.17          | 0.00              | A''      | 0.6676       |
| 13        | vib      | 881.62          | 0.00              | A''      | 21.2600      |
| 14        | vib      | 951.46          | 0.00              | A''      | 9.9742       |
| 15        | vib      | 960.47          | 0.00              | A'       | 1.7126       |
| 16        | vib      | 1060.34         | 0.00              | A'       | 42.7513      |

|    |     |           |      |    |          |
|----|-----|-----------|------|----|----------|
| 17 | vib | 1088.16   | 0.00 | A' | 2.3310   |
| 18 | vib | 1233.00   | 0.00 | A' | 33.8319  |
| 19 | vib | 1321.99   | 0.00 | A' | 150.9829 |
| 20 | vib | 1360.68   | 0.00 | A' | 169.1611 |
| 21 | vib | 1518.08   | 0.00 | A' | 209.3523 |
| 22 | vib | 1546.35   | 0.00 | A' | 522.0013 |
| 23 | vib | 1705.31   | 0.00 | A' | 8.8472   |
| 24 | vib | 1802.96   | 0.00 | A' | 23.9008  |
| 25 | vib | 1842.46   | 0.00 | A' | 526.4285 |
| 26 | vib | 3224.16   | 0.00 | A' | 0.2037   |
| 27 | vib | 3658.28   | 0.00 | A' | 146.2294 |
| 28 | rot | 0.1145089 | -    |    |          |
| 29 | rot | 0.0470825 | -    |    |          |
| 30 | rot | 0.0333642 | -    |    |          |

----- ZPE & THERMAL CONTRIBUTIONS -----

Eelectronic [kJ/mol] = -1978886.559  
 Ezpe [kJ/mol] = +176.462  
 Eelectronic+Ezpe [kJ/mol] = -1978710.097

Eelectronic [hartrees] = -753.717981  
 Ezpe [hartrees] = +0.067211  
 Eelectronic+Ezpe [hartrees] = -753.650770

Thermal Correction to Energy [kJ/mol] = +192.678  
 Thermal Correction to Enthalpy [kJ/mol] = +195.156  
 Thermal Correction to Gibbs [kJ/mol] = +94.773

!+++++  
 END OF GAUSSIAN OUTPUT FILENAME: TS-NSU3-NSU1-m062x.log  
 !+++++

!+++++  
 GAUSSIAN OUTPUT FILENAME: TS-SU2-SU1-m062x.log  
 !+++++

1) LEVEL OF THEORY: OPT=(TS,CALCF,NOEIGENTEST,VTIGHT)  
 Charge = 0 Multiplicity = 1 Stoichiometry C4H4N2OS

----- OPTIMIZED GEOMETRY -----

| Center Number | Atomic Number | Atomic Type | Coordinates (Angstroms) |           |           |
|---------------|---------------|-------------|-------------------------|-----------|-----------|
|               |               |             | X                       | Y         | Z         |
| 1             | 7             | 0           | -0.971847               | -0.139562 | -0.000000 |
| 2             | 7             | 0           | 1.282300                | 0.423312  | -0.000000 |
| 3             | 6             | 0           | 0.000000                | 0.777406  | -0.000000 |
| 4             | 6             | 0           | -0.733758               | -1.541525 | 0.000000  |
| 5             | 6             | 0           | 0.675576                | -1.875774 | 0.000000  |
| 6             | 6             | 0           | 1.611151                | -0.899279 | 0.000000  |
| 7             | 1             | 0           | 0.938070                | -2.921769 | 0.000000  |
| 8             | 1             | 0           | 2.670160                | -1.121626 | 0.000000  |
| 9             | 16            | 0           | -0.074963               | 2.483346  | -0.000000 |
| 10            | 1             | 0           | 1.422698                | 1.798160  | -0.000000 |
| 11            | 8             | 0           | -1.672503               | -2.298007 | 0.000000  |
| 12            | 1             | 0           | -1.942491               | 0.144534  | -0.000000 |

Rotational constants (GHZ): 3.8585658 1.2880472 0.9656865

----- FREQUENCIES AND ROTATIONAL CONSTANTS -----

| INDEX NO. | DOF TYPE | CM-1 (UNSCALED) | CM-1 (SCALED BY ) | SYMMETRY | IR-INTENSITY |
|-----------|----------|-----------------|-------------------|----------|--------------|
| 1         | vib      | -1622.57        | 0.00              | A'       | 1458.1710    |
| 2         | vib      | 138.80          | 0.00              | A''      | 0.9629       |
| 3         | vib      | 179.48          | 0.00              | A''      | 5.2643       |

|    |     |           |      |     |          |
|----|-----|-----------|------|-----|----------|
| 4  | vib | 303.56    | 0.00 | A'  | 2.4270   |
| 5  | vib | 412.83    | 0.00 | A'' | 13.7792  |
| 6  | vib | 478.37    | 0.00 | A'  | 20.7286  |
| 7  | vib | 533.32    | 0.00 | A'  | 2.4834   |
| 8  | vib | 553.29    | 0.00 | A'  | 5.2717   |
| 9  | vib | 633.81    | 0.00 | A'' | 4.6729   |
| 10 | vib | 722.63    | 0.00 | A'' | 51.9697  |
| 11 | vib | 738.79    | 0.00 | A'  | 15.2217  |
| 12 | vib | 769.22    | 0.00 | A'' | 6.0141   |
| 13 | vib | 844.10    | 0.00 | A'' | 57.1592  |
| 14 | vib | 867.86    | 0.00 | A'' | 15.8955  |
| 15 | vib | 900.59    | 0.00 | A'  | 11.3065  |
| 16 | vib | 1017.07   | 0.00 | A'' | 0.2552   |
| 17 | vib | 1028.81   | 0.00 | A'  | 26.6730  |
| 18 | vib | 1108.24   | 0.00 | A'  | 21.5281  |
| 19 | vib | 1175.21   | 0.00 | A'  | 47.8526  |
| 20 | vib | 1222.07   | 0.00 | A'  | 25.8980  |
| 21 | vib | 1298.98   | 0.00 | A'  | 137.8138 |
| 22 | vib | 1436.00   | 0.00 | A'  | 0.5680   |
| 23 | vib | 1509.77   | 0.00 | A'  | 36.1318  |
| 24 | vib | 1538.51   | 0.00 | A'  | 802.5079 |
| 25 | vib | 1659.26   | 0.00 | A'  | 147.8476 |
| 26 | vib | 1822.98   | 0.00 | A'  | 325.2428 |
| 27 | vib | 1834.62   | 0.00 | A'  | 396.7832 |
| 28 | vib | 3229.74   | 0.00 | A'  | 6.1758   |
| 29 | vib | 3269.18   | 0.00 | A'  | 1.9717   |
| 30 | vib | 3603.80   | 0.00 | A'  | 84.2119  |
| 31 | rot | 0.1287079 | -    |     |          |
| 32 | rot | 0.0429646 | -    |     |          |
| 33 | rot | 0.0322118 | -    |     |          |

----- ZPE & THERMAL CONTRIBUTIONS -----

Eelectronic [kJ/mol] = -1936863.153  
 Ezpe [kJ/mol] = +208.336  
 Eelectronic+Ezpe [kJ/mol] = -1936654.817  
  
 Eelectronic [hartrees] = -737.712113  
 Ezpe [hartrees] = +0.079351  
 Eelectronic+Ezpe [hartrees] = -737.632762  
  
 Thermal Correction to Energy [kJ/mol] = +224.617  
 Thermal Correction to Enthalpy [kJ/mol] = +227.095  
 Thermal Correction to Gibbs [kJ/mol] = +126.820

!+++++  
 END OF GAUSSIAN OUTPUT FILENAME: TS-SU2-SU1-m062x.log  
 !+++++

!+++++  
 GAUSSIAN OUTPUT FILENAME: TS-SU2-SU1.log  
 !+++++

1) LEVEL OF THEORY: OPT=(TS,CALCF,NOEIGENTEST,VTIGHT)  
 Charge = 0 Multiplicity = 1 Stoichiometry C4H4N2OS

----- OPTIMIZED GEOMETRY -----

| Center Number | Atomic Number | Atomic Type | Coordinates (Angstroms) |           |           |
|---------------|---------------|-------------|-------------------------|-----------|-----------|
|               |               |             | X                       | Y         | Z         |
| 1             | 7             | 0           | -0.978382               | -0.131991 | 0.000000  |
| 2             | 7             | 0           | 1.286005                | 0.412031  | -0.000000 |
| 3             | 6             | 0           | -0.000000               | 0.781602  | 0.000000  |
| 4             | 6             | 0           | -0.747220               | -1.544357 | -0.000000 |
| 5             | 6             | 0           | 0.657837                | -1.884254 | -0.000000 |
| 6             | 6             | 0           | 1.605963                | -0.911004 | -0.000000 |

|    |    |   |           |           |           |
|----|----|---|-----------|-----------|-----------|
| 7  | 1  | 0 | 0.917258  | -2.931526 | -0.000000 |
| 8  | 1  | 0 | 2.663439  | -1.141923 | -0.000000 |
| 9  | 16 | 0 | -0.047929 | 2.493257  | 0.000000  |
| 10 | 1  | 0 | 1.459538  | 1.788822  | 0.000000  |
| 11 | 8  | 0 | -1.697292 | -2.296785 | -0.000000 |
| 12 | 1  | 0 | -1.947875 | 0.154587  | 0.000000  |

-----  
Rotational constants (GHZ):                    3.8498870                    1.2773895                    0.9591457

-----  
----- FREQUENCIES AND ROTATIONAL CONSTANTS -----  
-----

| INDEX NO. | DOF TYPE | CM-1 (UNSCALED) | CM-1 (SCALED BY ) | SYMMETRY | IR-INTENSITY |
|-----------|----------|-----------------|-------------------|----------|--------------|
| 1         | vib      | -1622.43        | 0.00              | A'       | 1329.5291    |
| 2         | vib      | 133.67          | 0.00              | A''      | 0.9435       |
| 3         | vib      | 178.84          | 0.00              | A''      | 4.8891       |
| 4         | vib      | 298.09          | 0.00              | A'       | 2.1722       |
| 5         | vib      | 414.12          | 0.00              | A''      | 13.4740      |
| 6         | vib      | 473.54          | 0.00              | A'       | 20.0482      |
| 7         | vib      | 525.26          | 0.00              | A'       | 1.9580       |
| 8         | vib      | 553.33          | 0.00              | A'       | 5.8639       |
| 9         | vib      | 625.67          | 0.00              | A''      | 6.0406       |
| 10        | vib      | 710.37          | 0.00              | A''      | 50.4785      |
| 11        | vib      | 733.34          | 0.00              | A'       | 11.1688      |
| 12        | vib      | 755.98          | 0.00              | A''      | 3.8709       |
| 13        | vib      | 831.85          | 0.00              | A''      | 52.7049      |
| 14        | vib      | 862.80          | 0.00              | A''      | 14.2887      |
| 15        | vib      | 874.29          | 0.00              | A'       | 8.8477       |
| 16        | vib      | 994.95          | 0.00              | A''      | 0.2883       |
| 17        | vib      | 1015.67         | 0.00              | A'       | 18.5064      |
| 18        | vib      | 1097.44         | 0.00              | A'       | 25.8876      |
| 19        | vib      | 1149.92         | 0.00              | A'       | 33.3687      |
| 20        | vib      | 1211.78         | 0.00              | A'       | 42.3409      |
| 21        | vib      | 1291.78         | 0.00              | A'       | 154.4907     |
| 22        | vib      | 1423.91         | 0.00              | A'       | 1.9991       |
| 23        | vib      | 1483.62         | 0.00              | A'       | 35.8905      |
| 24        | vib      | 1505.36         | 0.00              | A'       | 597.9554     |
| 25        | vib      | 1613.76         | 0.00              | A'       | 121.2851     |
| 26        | vib      | 1775.23         | 0.00              | A'       | 635.6522     |
| 27        | vib      | 1810.26         | 0.00              | A'       | 8.5806       |
| 28        | vib      | 3194.07         | 0.00              | A'       | 7.7159       |
| 29        | vib      | 3233.58         | 0.00              | A'       | 0.2115       |
| 30        | vib      | 3577.80         | 0.00              | A'       | 67.1892      |
| 31        | rot      | 0.1284184       | -                 |          |              |
| 32        | rot      | 0.0426091       | -                 |          |              |
| 33        | rot      | 0.0319937       | -                 |          |              |

-----  
----- ZPE & THERMAL CONTRIBUTIONS -----  
-----

|                                |            |                |
|--------------------------------|------------|----------------|
| Eelectronic                    | [kJ/mol]   | = -1937313.533 |
| Ezpe                           | [kJ/mol]   | = +205.461     |
| Eelectronic+Ezpe               | [kJ/mol]   | = -1937108.072 |
|                                |            |                |
| Eelectronic                    | [hartrees] | = -737.883654  |
| Ezpe                           | [hartrees] | = +0.078256    |
| Eelectronic+Ezpe               | [hartrees] | = -737.805398  |
|                                |            |                |
| Thermal Correction to Energy   | [kJ/mol]   | = +221.902     |
| Thermal Correction to Enthalpy | [kJ/mol]   | = +224.380     |
| Thermal Correction to Gibbs    | [kJ/mol]   | = +123.790     |

!+++++  
END OF GAUSSIAN OUTPUT FILENAME: TS-SU2-SU1.log

!+++++  
GAUSSIAN OUTPUT FILENAME: TS-SU3-SU1-m062x.log

1)LEVEL OF THEORY: M062X/DEF2TZVP  
 Charge = 0 Multiplicity = 1 Stoichiometry C4H4N2OS

-----  
 ----- OPTIMIZED GEOMETRY -----  
 -----

| Center Number | Atomic Number | Atomic Type | Coordinates (Angstroms) |           |           |
|---------------|---------------|-------------|-------------------------|-----------|-----------|
|               |               |             | X                       | Y         | Z         |
| 1             | 7             | 0           | -0.823697               | -0.222908 | 0.000000  |
| 2             | 7             | 0           | 1.336791                | 0.666041  | -0.000000 |
| 3             | 6             | 0           | 0.000000                | 0.808042  | 0.000000  |
| 4             | 6             | 0           | -0.376064               | -1.550951 | 0.000000  |
| 5             | 6             | 0           | 1.092410                | -1.683434 | -0.000000 |
| 6             | 6             | 0           | 1.881872                | -0.605635 | -0.000000 |
| 7             | 1             | 0           | 1.505538                | -2.680320 | -0.000000 |
| 8             | 1             | 0           | 2.961525                | -0.650572 | -0.000000 |
| 9             | 16            | 0           | -0.922621               | 2.249592  | 0.000000  |
| 10            | 1             | 0           | -1.748477               | 0.854715  | 0.000000  |
| 11            | 8             | 0           | -1.132445               | -2.488983 | 0.000000  |
| 12            | 1             | 0           | 1.921947                | 1.484500  | -0.000000 |

Rotational constants (GHZ):                    3.3513045                    1.3989569                    0.9869627

-----  
 ----- FREQUENCIES AND ROTATIONAL CONSTANTS -----  
 -----

| INDEX NO. | DOF TYPE | CM-1 (UNSCALED) | CM-1 (SCALED BY ) | SYMMETRY | IR-INTENSITY |
|-----------|----------|-----------------|-------------------|----------|--------------|
| 1         | vib      | -1590.74        | 0.00              | A'       | 1472.0234    |
| 2         | vib      | 144.58          | 0.00              | A''      | 0.7232       |
| 3         | vib      | 158.01          | 0.00              | A''      | 0.4367       |
| 4         | vib      | 304.88          | 0.00              | A'       | 6.4448       |
| 5         | vib      | 416.85          | 0.00              | A''      | 5.4612       |
| 6         | vib      | 445.32          | 0.00              | A'       | 10.5303      |
| 7         | vib      | 547.73          | 0.00              | A'       | 4.1993       |
| 8         | vib      | 571.21          | 0.00              | A'       | 11.8250      |
| 9         | vib      | 575.88          | 0.00              | A''      | 78.3845      |
| 10        | vib      | 641.35          | 0.00              | A''      | 0.6327       |
| 11        | vib      | 712.43          | 0.00              | A'       | 15.0271      |
| 12        | vib      | 745.73          | 0.00              | A''      | 7.9075       |
| 13        | vib      | 848.51          | 0.00              | A''      | 52.2550      |
| 14        | vib      | 881.29          | 0.00              | A''      | 13.3862      |
| 15        | vib      | 937.10          | 0.00              | A'       | 8.4011       |
| 16        | vib      | 992.43          | 0.00              | A''      | 0.0089       |
| 17        | vib      | 1030.93         | 0.00              | A'       | 45.5564      |
| 18        | vib      | 1076.34         | 0.00              | A'       | 9.8010       |
| 19        | vib      | 1206.32         | 0.00              | A'       | 8.5995       |
| 20        | vib      | 1217.37         | 0.00              | A'       | 6.7842       |
| 21        | vib      | 1304.01         | 0.00              | A'       | 290.5481     |
| 22        | vib      | 1423.02         | 0.00              | A'       | 2.1820       |
| 23        | vib      | 1523.12         | 0.00              | A'       | 189.1160     |
| 24        | vib      | 1569.12         | 0.00              | A'       | 607.4026     |
| 25        | vib      | 1714.05         | 0.00              | A'       | 71.4062      |
| 26        | vib      | 1807.17         | 0.00              | A'       | 157.1438     |
| 27        | vib      | 1830.53         | 0.00              | A'       | 472.2374     |
| 28        | vib      | 3240.07         | 0.00              | A'       | 2.0672       |
| 29        | vib      | 3262.22         | 0.00              | A'       | 0.9616       |
| 30        | vib      | 3665.06         | 0.00              | A'       | 128.8569     |
| 31        | rot      | 0.1117875       | -                 |          |              |
| 32        | rot      | 0.0466642       | -                 |          |              |
| 33        | rot      | 0.0329215       | -                 |          |              |

-----  
 ----- ZPE & THERMAL CONTRIBUTIONS -----  
 -----

Eelectronic                    [kJ/mol]    = -1936837.806  
 Ezpe                            [kJ/mol]    = +208.105  
 Eelectronic+Ezpe            [kJ/mol]    = -1936629.701  
  
 Eelectronic                    [hartrees] = -737.702459

Ezpe [hartrees] = +0.079263  
Eelectronic+Ezpe [hartrees] = -737.623196

Thermal Correction to Energy [kJ/mol] = +224.659  
Thermal Correction to Enthalpy [kJ/mol] = +227.137  
Thermal Correction to Gibbs [kJ/mol] = +126.315

---

!+++++  
END OF GAUSSIAN OUTPUT FILENAME: TS-SU3-SU1-m062x.log  
!+++++
